# Supplementary material for: Lack of Hikeshi activates HSF1 activity under normal conditions and disturbs the heat-shock response
Source: Life Sci Alliance. 2022 May 17;5(9):e202101241. doi: 10.26508/lsa.202101241 (PMC9113944; doi:10.26508/lsa.202101241)
Supplement: Supplementary file 1 [file LSA-2021-01241_TableS1.xlsx]

## Sheet: HeLa FC > 1.5
Upregulated genes under nonstressed conditions in the Hikeshi-KO HeLa cells, compared with WT cells (fold change > 1.5)
																1_HeLa_non-HS (151007_Hiseq3A_l3_009)			2_Hikeshi-KO#1_non-HS (151007_Hiseq3A_l3_010)			3_Hikeshi-KO#2_non-HS (151007_Hiseq3A_l3_011)				non-HS Hikeshi-KO#1/WT	non-HS Hikeshi-KO#2/WT
UniProt Gene Name	UniProt ID	inhouse_ID	name	chromosome	strand	UTR_start	UTR_end	CDS_start	CDS_end	exon num	exon_starts	exon_ends	mRNA_length	symbol	definition	tag	ppm	rpkm	tag	ppm	rpkm	tag	ppm	rpkm		rpkm ratio	rpkm ratio
CAC1H_HUMAN,	O95180,	596	NM_001005407,NM_021098	chr16	+	1203240	1271772	1203737	1270994	35	1203240,1203719,1244971,1245431,1245925,1248614,1250255,1250715,1251662,1254009,1255113,1256103,1257000,1257274,1257769,1258012,1259031,1260034,1260369,1260582,1260786,1261167,1261480,1261715,1261945,1262510,1263779,1264971,1265241,1265522,1266931,1267918,1268209,1268969,1269980,	1203470,1204036,1245083,1245565,1246023,1248774,1250571,1250808,1252452,1254458,1255265,1256289,1257118,1257430,1257860,1258221,1259412,1260135,1260493,1260651,1260971,1261294,1261606,1261805,1262138,1262528,1263931,1265081,1265375,1265593,1267010,1268040,1268651,1269130,1271772,	8088	CACNA1H	calcium channel, voltage-dependent, T type, alpha 1H subunit	27	0.72	0.08	337	11.36	1.4	57	1.23	0.15		17.5	1.875
PTN_HUMAN,	P21246,	2914	NM_002825	chr7	-	136912091	137028546	136912766	136939720	5	136912091,136935976,136938210,136939605,137028184,	136912822,136936138,136938384,136939721,137028546,	1545	PTN	pleiotrophin	14	0.37	0.23	171	5.76	3.72	64	1.38	0.89		16.1739	3.86957
CD180_HUMAN,	Q99467,	18726	NM_005582	chr5	-	66478103	66492617	66478684	66492469	3	66478103,66481678,66492379,	66480413,66481845,66492617,	2715	CD180	CD180 molecule	8	0.21	0.07	90	3.03	1.11	106	2.29	0.84		15.8571	12
CRYAB_HUMAN,	P02511,	13891	NM_001885	chr11	-	111779349	111782473	111779487	111782448	3	111779349,111781050,111782247,	111779691,111781173,111782473,	691	CRYAB	crystallin, alpha B	43	1.15	1.66	495	16.69	24.15	87	1.88	2.72		14.5482	1.63855
GRIP2_HUMAN,	Q9C0E4,	5305	NM_001080423	chr3	-	14530618	14583588	14535172	14583588	25	14530618,14536350,14537924,14545073,14547122,14548308,14549068,14551327,14552672,14552920,14554284,14555172,14555799,14558571,14559279,14561617,14561896,14563148,14564506,14565118,14565899,14566943,14567357,14581775,14583379,	14535334,14536497,14538068,14545179,14547297,14548488,14549208,14551472,14552818,14552987,14554365,14555318,14555986,14558721,14559405,14561786,14562044,14563294,14564582,14565205,14566045,14567079,14567438,14581897,14583588,	7976	GRIP2	glutamate receptor interacting protein 2	29	0.77	0.09	166	5.59	0.7	120	2.6	0.32		7.77778	3.55556
HSP76_HUMAN,	P17066,	6953	NM_002155	chr1	+	161494035	161496687	161494448	161496380	1	161494035,	161496687,	2652	HSPA6	heat shock 70kDa protein 6 (HSP70B')	17	0.45	0.16	89	3	1.13	235	5.09	1.91		7.0625	11.9375
CSRP2_HUMAN,	Q16527,	11347	NM_001321	chr12	-	77252495	77272799	77252731	77260040	6	77252495,77253326,77254063,77256955,77259928,77272717,	77252808,77253420,77254193,77257124,77260041,77272799,	901	CSRP2	cysteine and glycine-rich protein 2	37	0.99	1.09	155	5.22	5.79	90	1.95	2.16		5.31193	1.98165
MYOM3_HUMAN,	Q5VTT5,	1015	NM_152372	chr1	-	24382530	24438665	24383853	24435126	37	24382530,24385413,24387549,24387762,24388435,24389615,24389981,24390561,24392380,24393510,24394459,24394712,24397606,24398458,24400649,24401808,24402648,24406505,24407819,24408490,24409082,24410957,24413133,24416027,24416554,24417286,24418663,24419436,24421342,24421931,24424412,24426169,24432409,24433562,24434482,24434965,24438520,	24384117,24385469,24387572,24387799,24388599,24389724,24390020,24390649,24392491,24393578,24394519,24394857,24397743,24398503,24400759,24401965,24402763,24406684,24407946,24408678,24409204,24411129,24413317,24416155,24416608,24417486,24418805,24419598,24421480,24421976,24424501,24426265,24432567,24433722,24434563,24435144,24438665,	5800	MYOM3	myomesin family, member 3	264	7.07	1.21	1042	35.15	6.06	843	18.29	3.15		5.00826	2.60331
UCP4_HUMAN,	O95847,	934	NM_001204051,NM_001204052,NM_004277	chr6	+	46620651	46645927	46620929	46644417	9	46620651,46623579,46626698,46630112,46632510,46636445,46637871,46638862,46644119,	46621035,46623771,46626783,46630235,46632623,46636530,46637964,46638965,46645927,	2986	SLC25A27	solute carrier family 25, member 27	50	1.34	0.44	181	6.1	2.04	117	2.53	0.84		4.63636	1.90909
		21916	NR_024344	chr11	-	133766329	133771635	133771635	133771635	1	133766329,	133771635,	5306	LOC283174	uncharacterized LOC283174	43	1.15	0.21	152	5.12	0.96	549	11.91	2.24		4.57143	10.6667
GBRB3_HUMAN,	P28472,	13407	NM_000814,NM_001191320,NM_001191321,NM_021912	chr15	-	26788693	27018935	26792939	27018871	12	26788693,26806078,26812727,26825465,26828478,26866460,26874123,26961760,27017548,27017827,27018029,27018791,	26793281,26806323,26812880,26825603,26828561,26866681,26874237,26961912,27017616,27017919,27018223,27018935,	6192	GABRB3	gamma-aminobutyric acid (GABA) A receptor, beta 3	45	1.2	0.19	157	5.29	0.85	147	3.18	0.51		4.47368	2.68421
NCF2_HUMAN,	P19878,	8533	NM_000433,NM_001127651,NM_001190789,NM_001190794	chr1	-	183524696	183560056	183525252	183559464	16	183524696,183529230,183532329,183532568,183533139,183534838,183536054,183536338,183538276,183539914,183542319,183543621,183546733,183556029,183559290,183559974,	183525365,183529408,183532441,183532720,183533165,183534914,183536123,183536480,183538320,183539974,183542427,183543756,183546842,183556112,183559739,183560056,	2494	NCF2	neutrophil cytosolic factor 2	34	0.91	0.36	119	4.01	1.6	105	2.27	0.91		4.44444	2.52778
REEP1_HUMAN,	Q9H902,	6411	NM_001164730,NM_001164731,NM_001164732,NM_022912	chr2	-	86441119	86565206	86444161	86565199	8	86441119,86459747,86479079,86481816,86491087,86509292,86564601,86565146,	86444233,86459925,86479193,86481937,86491164,86509365,86564777,86565206,	3913	REEP1	receptor accessory protein 1	76	2.03	0.51	261	8.8	2.24	268	5.81	1.48		4.39216	2.90196
MLC1_HUMAN,	Q15049,	4346	NM_015166,NM_139202	chr22	-	50497819	50524358	50500011	50523331	13	50497819,50502462,50506861,50508955,50512644,50515269,50515829,50518346,50518772,50521512,50523154,50523567,50523783,	50500086,50502627,50506984,50509012,50512761,50515341,50515931,50518448,50518826,50521602,50523390,50523781,50524358,	4174	MLC1	megalencephalic leukoencephalopathy with subcortical cysts 1	34	0.91	0.21	110	3.71	0.88	76	1.64	0.39		4.19048	1.85714
DOC11_HUMAN,	Q5JSL3,	10283	NM_144658	chrX	+	117629871	117820123	117629934	117819770	53	117629871,117676687,117676888,117677473,117679285,117679983,117695345,117699967,117700536,117702041,117706285,117707768,117712487,117714059,117718697,117719003,117722099,117722375,117724172,117727176,117731393,117731992,117733101,117739200,117742034,117742193,117743240,117744234,117748654,117749562,117752512,117758501,117761466,117762125,117764341,117770308,117772042,117773397,117775152,117777419…	117630036,117676804,117676978,117677556,117679355,117680079,117695480,117700145,117700616,117702125,117706426,117707981,117712610,117714142,117718820,117719080,117722284,117722441,117724265,117727300,117731515,117732079,117733191,117739319,117742104,117742319,117743312,117744381,117748738,117749674,117752691,117758618,117761542,117762235,117764453,117770375,117772090,117773540,117775268,117777557…	6638	DOCK11	dedicator of cytokinesis 11	255	6.83	1.02	796	26.85	4.04	543	11.78	1.77		3.96078	1.73529
HS71B_HUMAN,	P0DMV9,	10145	NM_005345	chr6	+	31783290	31785719	31783533	31785459	1	31783290,	31785719,	2429	HSPA1A	heat shock 70kDa protein 1A	5495	147.32	60.65	16451	554.95	228.46	22607	490.52	201.94		3.76686	3.3296
LY6D_HUMAN,	Q14210,	11939	NM_003695	chr8	-	143866297	143868008	143866636	143867932	3	143866297,143867004,143867880,	143866872,143867103,143868008,	802	LY6D	lymphocyte antigen 6 complex, locus D	43	1.15	1.43	128	4.31	5.37	80	1.73	2.15		3.75524	1.5035
		3731	NM_014987	chr11	-	133785184	133826880	133788933	133826649	20	133785184,133788918,133789636,133792071,133792463,133794714,133795633,133796810,133799565,133800878,133801347,133801549,133801965,133805511,133805947,133807270,133807704,133814114,133815955,133826585,	133788197,133789000,133791292,133792117,133792625,133794799,133795860,133796986,133799677,133801029,133801464,133801690,133802108,133805657,133806089,133807388,133807856,133814261,133816153,133826880,	7309	IGSF9B	immunoglobulin superfamily, member 9B	55	1.47	0.2	158	5.32	0.72	432	9.37	1.28		3.6	6.4
PAPP2_HUMAN,	Q9BXP8,	17951	NM_020318,NM_021936	chr1	+	176432306	176811970	176525458	176811590	23	176432306,176524542,176563659,176640105,176659272,176661261,176664873,176668235,176671742,176675494,176679118,176680970,176708761,176709115,176734801,176738742,176740102,176758944,176760482,176762695,176769196,176809308,176811515,	176432554,176526377,176564731,176640251,176660341,176661454,176664995,176668725,176671871,176675586,176679312,176681117,176708897,176709332,176734973,176738920,176740316,176759113,176760618,176762805,176769268,176809407,176811970,	7695	PAPPA2	pappalysin 2	55	1.47	0.19	152	5.12	0.66	221	4.79	0.62		3.47368	3.26316
TBA1A_HUMAN,	Q71U36,	18503	NM_006009	chr12	-	49578582	49582861	49578792	49582762	4	49578582,49580092,49580393,49582759,	49579773,49580241,49580616,49582861,	1665	TUBA1A	tubulin, alpha 1a	588	15.76	9.46	1536	51.81	31.11	1180	25.6	15.37		3.28858	1.62474
C1QT1_HUMAN,	Q9BXJ1,	837	NM_030968,NM_198593,NM_198594	chr17	+	77020250	77045870	77040050	77044170	5	77020250,77030471,77040036,77042636,77043619,	77020576,77030615,77040205,77042776,77045870,	3030	C1QTNF1	C1q and tumor necrosis factor related protein 1	103	2.76	0.91	266	8.97	2.96	216	4.68	1.54		3.25275	1.69231
CP2B6_HUMAN,	P20813,	17767	NM_000767	chr19	+	41497203	41524301	41497210	41522732	9	41497203,41509905,41510201,41512809,41515123,41515898,41518202,41518578,41522550,	41497381,41510068,41510351,41512970,41515300,41516040,41518390,41518720,41524301,	3052	CYP2B6	cytochrome P450, family 2, subfamily B, polypeptide 6	2	0.05	0.01	3	0.1	0.03	204	4.42	1.44		3	144
SCD5_HUMAN,	Q86SK9,	10947	NM_001037582,NM_024906	chr4	-	83550689	83720010	83552479	83719690	6	83550689,83557743,83581039,83601859,83626435,83719458,	83552670,83557976,83582230,83602065,83626566,83720010,	4294	SCD5	stearoyl-CoA desaturase 5	151	4.04	0.94	357	12.04	2.8	454	9.85	2.29		2.97872	2.43617
BEGIN_HUMAN,	Q9BUH8,	682	NM_001159531,NM_020836	chr14	-	101003483	101036131	101004305	101034261	7	101003483,101006832,101010194,101011336,101012837,101034247,101036074,	101005652,101006916,101010302,101011403,101012999,101034407,101036131,	2807	BEGAIN	brain-enriched guanylate kinase-associated homolog (rat)	236	6.32	2.25	545	18.38	6.54	883	19.15	6.82		2.90667	3.03111
POLS2_HUMAN,	Q5K4E3,	2839	NM_173502	chr16	-	31150247	31161415	31150458	31161356	15	31150247,31151614,31151812,31152789,31153043,31153801,31154057,31154662,31154908,31157109,31159715,31160393,31160783,31161016,31161319,	31150737,31151736,31152078,31152931,31153281,31153965,31154314,31154792,31155158,31157276,31159996,31160556,31160819,31161052,31161415,	2838	PRSS36	protease, serine, 36	57	1.52	0.53	130	4.38	1.54	117	2.53	0.89		2.90566	1.67925
S12A7_HUMAN,	Q9Y666,	2238	NM_006598	chr5	-	1050488	1112172	1052474	1112106	24	1050488,1053463,1057585,1060458,1063958,1064197,1065397,1073747,1074681,1075485,1076252,1076808,1077947,1078815,1079512,1081691,1083859,1085346,1087017,1088420,1089096,1093647,1094268,1111982,	1052566,1053597,1057764,1060566,1064090,1064367,1065593,1073916,1074786,1075605,1076351,1076927,1078122,1078873,1079611,1081859,1084071,1085588,1087148,1088475,1089243,1093770,1094363,1112172,	5304	SLC12A7	solute carrier family 12 (potassium/chloride transporters), member 7	1010	27.07	5.1	2325	78.43	14.78	2749	59.64	11.24		2.89804	2.20392
SYNCI_HUMAN,	Q9H7C4,	848	NM_001161708,NM_030786	chr1	-	33145506	33168361	33147388	33168261	5	33145506,33149610,33149858,33160465,33168208,	33147461,33149690,33149983,33161645,33168361,	3493	SYNC	syncoilin, intermediate filament protein	397	10.64	3.04	909	30.66	8.77	761	16.51	4.72		2.88487	1.55263
HS71B_HUMAN,	P0DMV9,	4732	NM_005346	chr6	+	31795511	31798031	31795727	31797653	1	31795511,	31798031,	2520	HSPA1B	heat shock 70kDa protein 1B	4599	123.3	48.92	10496	354.07	140.5	14476	314.09	124.63		2.87204	2.54763
IL32_HUMAN,	P24001,	18516	NM_001012631,NM_001012632,NM_001012633,NM_001012634,NM_001012635,NM_001012636,NM_001012718,NM_004221	chr16	+	3115312	3119668	3115812	3119356	8	3115312,3115611,3115781,3117377,3117554,3117984,3118180,3118990,	3115495,3115711,3115827,3117416,3117614,3118011,3118240,3119668,	1193	IL32	interleukin 32	389	10.42	8.73	883	29.78	24.96	879	19.07	15.98		2.85911	1.83047
EEPD1_HUMAN,	Q7L9B9,	254	NM_030636	chr7	+	36192835	36341152	36193933	36338815	8	36192835,36193741,36278593,36320723,36324294,36327247,36336601,36338615,	36193283,36194811,36278645,36320834,36324429,36327386,36336796,36341152,	4687	EEPD1	endonuclease/exonuclease/phosphatase family domain containing 1	53	1.42	0.3	119	4.01	0.85	123	2.66	0.56		2.83333	1.86667
ZBT7C_HUMAN,	A1YPR0,	8876	NM_001039360	chr18	-	45553638	45663680	45555630	45567478	3	45553638,45566270,45663377,	45556282,45567494,45663680,	4171	ZBTB7C	zinc finger and BTB domain containing 7C	79	2.11	0.5	174	5.86	1.4	143	3.1	0.74		2.8	1.48
GGT1_HUMAN,	P19440,	3531	NM_001032364,NM_001032365,NM_005265,NM_013430	chr22	+	24979717	25024972	25007048	25024806	18	24979717,24999123,25003625,25003920,25005931,25006216,25007041,25010742,25011007,25016294,25016879,25019073,25019746,25023398,25023818,25024047,25024241,25024659,	24979776,24999288,25003699,25003990,25006000,25006498,25007212,25010873,25011094,25016487,25017037,25019223,25019883,25023586,25023946,25024160,25024355,25024972,	2602	GGT1	gamma-glutamyltransferase 1	283	7.58	2.91	562	18.95	7.28	637	13.82	5.31		2.50172	1.82474
CHSTB_HUMAN,	Q9NPF2,	10568	NM_001173982,NM_018413	chr12	+	104850691	105155792	104851189	105151581	3	104850691,104995683,105150726,	104851307,104995769,105155792,	5768	CHST11	carbohydrate (chondroitin 4) sulfotransferase 11	176	4.71	0.81	339	11.43	1.98	407	8.83	1.53		2.44444	1.88889
TSH2_HUMAN,	Q9NRE2,	2057	NM_001193421,NM_173485	chr20	+	51588945	52111869	51589832	51873102	4	51588945,51801821,51870037,52103682,	51589872,51802215,51873110,52111869,	12581	TSHZ2	teashirt zinc finger homeobox 2	176	4.71	0.37	339	11.43	0.9	610	13.23	1.05		2.43243	2.83784
DNJB1_HUMAN,	P25685,	10871	NM_006145	chr19	-	14625581	14629201	14626751	14629161	3	14625581,14627277,14628950,	14626982,14627858,14629201,	2233	DNAJB1	DnaJ (Hsp40) homolog, subfamily B, member 1	4508	120.86	54.12	8710	293.82	131.58	16048	348.2	155.93		2.43126	2.88119
PLGF_HUMAN,	P49763,	15959	NM_001207012,NM_002632	chr14	-	75408532	75422467	75409408	75421945	7	75408532,75412915,75413081,75415209,75416059,75420606,75421870,	75409436,75412978,75413111,75415286,75416256,75420649,75422467,	1911	PGF	placental growth factor	62	1.66	0.86	119	4.01	2.09	234	5.07	2.65		2.43023	3.0814
HS71L_HUMAN,	P34931,	8769	NM_005527	chr6	-	31777395	31782835	31777823	31779749	2	31777395,31782665,	31779762,31782835,	2537	HSPA1L	heat shock 70kDa protein 1-like	268	7.18	2.83	517	17.44	6.87	680	14.75	5.81		2.42756	2.053
FOLR1_HUMAN,	P15328,	12663	NM_000802,NM_016724,NM_016725,NM_016729	chr11	+	71900601	71907367	71903217	71907221	7	71900601,71900958,71901619,71903172,71906314,71906655,71906940,	71900803,71900975,71901685,71903385,71906503,71906791,71907367,	1250	FOLR1	folate receptor 1 (adult)	3658	98.07	78.45	7012	236.54	189.23	30969	671.95	537.55		2.41211	6.85214
TECT1_HUMAN,	Q2MV58,	17563	NM_001082537,NM_001082538,NM_001173975,NM_001173976,NM_024549	chr12	+	111051831	111086935	111051987	111085697	17	111051831,111054081,111057640,111064166,111066571,111070276,111072200,111072474,111074285,111078187,111078828,111079346,111080053,111082771,111085000,111085553,111086847,	111052268,111054157,111057761,111064297,111066723,111070364,111072268,111072584,111074306,111078322,111078954,111079432,111080194,111082934,111085141,111085698,111086935,	2229	TCTN1	tectonic family member 1	263	7.05	3.16	500	16.86	7.56	613	13.3	5.96		2.39241	1.88608
PITC1_HUMAN,	Q9UKF7,	17894	NM_012417,NM_181671	chr17	+	65373923	65689647	65374270	65689004	10	65373923,65528917,65548372,65549725,65574301,65628258,65665623,65671594,65683181,65688687,	65374318,65529066,65548461,65549733,65574373,65628354,65665779,65671658,65683300,65689647,	2108	PITPNC1	phosphatidylinositol transfer protein, cytoplasmic 1	85	2.27	1.07	157	5.29	2.5	704	15.27	7.24		2.33645	6.76636
CLUS_HUMAN,	P10909,	6366	NM_001831	chr8	-	27454433	27472328	27455757	27468088	9	27454433,27455976,27457296,27461807,27462440,27463870,27466454,27467991,27472171,	27455767,27456152,27457526,27461912,27462852,27464041,27466603,27468117,27472328,	2860	CLU	clusterin	57271	1535.52	536.89	105957	3574.36	1249.77	111135	2411.38	843.13		2.3278	1.5704
PKHA4_HUMAN,	Q9H4M7,	17482	NM_001161354,NM_020904	chr19	-	49340353	49371884	49340545	49370877	20	49340353,49341273,49342461,49344405,49348626,49348773,49351156,49355484,49356938,49357263,49357473,49360678,49362116,49362725,49363606,49364657,49364876,49368759,49370793,49371339,	49340808,49341386,49342520,49344567,49348703,49348873,49351297,49355583,49357088,49357344,49357521,49360753,49362396,49362941,49363716,49364758,49364949,49368867,49370883,49371884,	3083	PLEKHA4	pleckstrin homology domain containing, family A (phosphoinositide binding specific) member 4	56	1.5	0.48	101	3.4	1.1	106	2.29	0.74		2.29167	1.54167
CO5_HUMAN,	P01031,	8633	NM_001735	chr9	-	123714613	123812554	123715016	123812524	41	123714613,123716007,123719562,123722525,123723759,123724948,123725170,123725913,123731338,123732447,123734207,123737056,123738977,123742360,123744121,123744932,123751323,123751845,123753468,123758517,123759824,123768196,123769181,123770685,123776150,123777476,123778531,123779639,123779920,123782253,123783786,123785681,123787731,123789437,123792674,123794390,123797080,123800158,123805281,123808468…	123715146,123716146,123719646,123722615,123723843,123725054,123725245,123726016,123731396,123732529,123734270,123737209,123739183,123742532,123744217,123745092,123751399,123752058,123753558,123758578,123760052,123768336,123769255,123770776,123776348,123777539,123778661,123779789,123780130,123782457,123783972,123785797,123787858,123789552,123792765,123794473,123797172,123800229,123805444,123808661…	5464	C5	complement component 5	72	1.93	0.35	131	4.41	0.8	235	5.09	0.93		2.28571	2.65714
LGR6_HUMAN,	Q9HBX8,	5169	NM_001017403,NM_001017404,NM_021636	chr1	+	202163117	202288889	202163117	202288335	20	202163117,202172904,202183282,202194550,202197063,202205049,202245433,202249908,202266635,202269976,202270291,202272406,202273686,202274811,202275995,202276457,202278178,202279324,202283929,202287079,	202163329,202173003,202183365,202194622,202197135,202205121,202245649,202249980,202266704,202270048,202270363,202272475,202273758,202274877,202276067,202276529,202278304,202279485,202284010,202288889,	3640	LGR6	leucine-rich repeat containing G protein-coupled receptor 6	113	3.02	0.82	201	6.78	1.86	239	5.18	1.42		2.26829	1.73171
MSI1H_HUMAN,	O43347,	13985	NM_002442	chr12	-	120779132	120806958	120783393	120806894	15	120779132,120783372,120783937,120785248,120789146,120791101,120794704,120795618,120796807,120800845,120802516,120805810,120805994,120806635,120806835,	120780908,120783435,120784125,120785317,120789203,120791182,120794822,120795701,120796856,120800938,120802558,120805895,120806076,120806676,120806958,	2950	MSI1	musashi homolog 1 (Drosophila)	89	2.38	0.8	159	5.36	1.81	249	5.4	1.83		2.2625	2.2875
FGFP3_HUMAN,	Q8TAT2,	11106	NM_152429	chr10	-	93666344	93669258	93667949	93668726	2	93666344,93669154,	93668804,93669258,	2564	FGFBP3	fibroblast growth factor binding protein 3	47	1.26	0.49	84	2.83	1.1	139	3.01	1.17		2.2449	2.38776
RGS2_HUMAN,	P41220,	16959	NM_002923	chr1	+	192778168	192781407	192778201	192780726	5	192778168,192779295,192779499,192780110,192780531,	192778311,192779397,192779561,192780277,192781407,	1350	RGS2	regulator of G-protein signaling 2, 24kDa	859	23.03	17.05	1474	49.72	36.82	2090	45.34	33.58		2.15953	1.9695
TNAP3_HUMAN,	P21580,	13732	NM_006290	chr6	+	138188580	138204449	138192364	138202456	9	138188580,138192349,138195981,138196824,138197132,138198212,138199568,138201207,138202171,	138188631,138192659,138196172,138196972,138197303,138198393,138200488,138201389,138204449,	4432	TNFAIP3	tumor necrosis factor, alpha-induced protein 3	958	25.68	5.79	1643	55.42	12.5	2133	46.28	10.44		2.15889	1.80311
PCOC1_HUMAN,	Q15113,	5727	NM_002593	chr7	+	100199881	100205798	100200079	100205726	9	100199881,100201052,100201581,100202713,100203298,100204038,100205074,100205259,100205559,	100200174,100201161,100201840,100202838,100203435,100204253,100205146,100205430,100205798,	1620	PCOLCE	procollagen C-endopeptidase enhancer	894	23.96	14.79	1533	51.71	31.91	1849	40.11	24.75		2.15754	1.67343
RASM_HUMAN,	O14807,	5270	NM_001085049,NM_001252090,NM_001252091,NM_001252092,NM_001252093,NM_012219	chr3	+	138066489	138124377	138091725	138121111	9	138066489,138067507,138067691,138067969,138091707,138116165,138117310,138119375,138121011,	138067167,138067609,138067874,138068221,138091918,138116319,138117410,138119455,138124377,	5126	MRAS	muscle RAS oncogene homolog	29	0.77	0.15	50	1.68	0.32	201	4.36	0.85		2.13333	5.66667
CD33_HUMAN,	P20138,	8877	NM_001082618,NM_001177608,NM_001772	chr19	+	51728334	51743274	51728374	51742943	8	51728334,51728473,51729058,51729564,51738411,51738849,51739077,51742772,	51728411,51728854,51729337,51729612,51738508,51738931,51739221,51743274,	1610	CD33	CD33 molecule	229	6.13	3.8	387	13.05	8.1	694	15.05	9.34		2.13158	2.45789
I22R1_HUMAN,	Q8N6P7,	17950	NM_021258	chr1	-	24446260	24469775	24447294	24469572	7	24446260,24449791,24454630,24460700,24463620,24465071,24469529,	24448227,24449913,24454769,24460876,24463799,24465204,24469775,	2962	IL22RA1	interleukin 22 receptor, alpha 1	176	4.71	1.59	297	10.01	3.37	340	7.37	2.48		2.1195	1.55975
KREM2_HUMAN,	Q8NCW0,	14112	NM_001253725,NM_001253726,NM_024507,NM_172229	chr16	+	3014216	3018384	3014521	3018021	9	3014216,3014859,3016140,3016325,3016642,3016910,3017320,3017526,3017810,	3014615,3015034,3016232,3016450,3016796,3017243,3017446,3017605,3018384,	2057	KREMEN2	kringle containing transmembrane protein 2	42	1.12	0.54	70	2.36	1.14	151	3.27	1.58		2.11111	2.92593
PHC1_HUMAN,	P78364,	13158	NM_004426	chr12	+	9067315	9094060	9070273	9092055	15	9067315,9070225,9072351,9073580,9074196,9075228,9083030,9085158,9086460,9086862,9087719,9089451,9089771,9090424,9091900,	9067423,9070387,9072462,9073661,9074346,9075384,9083523,9085946,9086608,9087074,9087834,9089560,9089922,9090656,9094060,	5176	PHC1	polyhomeotic homolog 1 (Drosophila)	59	1.58	0.3	97	3.27	0.63	109	2.36	0.45		2.1	1.5
TSH1_HUMAN,	Q6ZSZ6,	5751	NM_005786	chr18	+	72922709	73001905	72997497	73000596	2	72922709,72997402,	72923198,73001905,	4992	TSHZ1	teashirt zinc finger homeobox 1	386	10.34	2.07	640	21.58	4.32	856	18.57	3.71		2.08696	1.79227
LIMS2_HUMAN,	Q7Z4I7,	13470	NM_001136037,NM_001161403,NM_001161404,NM_001256542,NM_017980	chr2	-	128395995	128439360	128396855	128432598	14	128395995,128397644,128397844,128398470,128399623,128400497,128405611,128411997,128412403,128414976,128421879,128431251,128432587,128438893,	128397003,128397720,128397893,128398563,128399774,128400647,128405828,128412118,128412470,128415136,128422167,128431317,128432764,128439360,	3090	LIMS2	LIM and senescent cell antigen-like domains 2	352	9.43	3.05	570	19.22	6.22	1130	24.51	7.93		2.03934	2.6
HS105_HUMAN,	Q92598,	17429	NM_006644	chr13	-	31710762	31736117	31711454	31735719	18	31710762,31712543,31712917,31713136,31714320,31715258,31717928,31719699,31722095,31722510,31724090,31725083,31725745,31726988,31728769,31729650,31732942,31735612,	31711661,31712705,31713037,31713244,31714446,31715396,31718060,31719905,31722229,31722617,31724319,31725328,31725879,31727088,31728892,31729791,31733000,31736117,	3667	HSPH1	heat shock 105kDa/110kDa protein 1	11775	315.7	86.09	19051	642.66	175.25	27213	590.46	161.01		2.03566	1.87025
		21930	NR_027064	chr19	-	5558177	5568005	5568005	5568005	3	5558177,5562092,5567675,	5561410,5562222,5568005,	3693	PLAC2	placenta-specific 2 (non-protein coding)	100	2.68	0.72	160	5.39	1.45	239	5.18	1.4		2.01389	1.94444
CE112_HUMAN,	Q8N8E3,	3457	NM_001037325,NM_001199165,NM_145036	chr17	-	63631657	64188212	63632088	64179417	29	63631657,63633241,63637081,63685246,63739185,63746779,63822255,63847921,63898269,63923699,63957580,64001807,64023618,64024430,64025240,64025986,64049853,64059080,64062895,64066032,64092368,64092702,64125863,64128787,64171161,64172947,64179311,64187776,64188114,	63632092,63633306,63637183,63685336,63739335,63746842,63822661,63848152,63898452,63923807,63957716,64001887,64023678,64024523,64025370,64026141,64049997,64059199,64062995,64066119,64092446,64092750,64125941,64128881,64171334,64173138,64179425,64187987,64188212,	4022	CEP112	centrosomal protein 112kDa	84	2.25	0.55	132	4.45	1.1	182	3.94	0.97		2	1.76364
BAG3_HUMAN,	O95817,	18257	NM_004281	chr10	+	121410881	121437329	121411187	121436794	4	121410881,121429362,121431766,121435975,	121411367,121429689,121432168,121437329,	2569	BAG3	BCL2-associated athanogene 3	3535	94.77	36.88	5607	189.14	73.62	8091	175.55	68.33		1.9962	1.85277
TTL11_HUMAN,	Q8NHH1,	15449	NM_001139442,NM_194252	chr9	-	124584203	124855885	124584865	124855697	9	124584203,124622615,124632775,124736287,124737162,124751189,124794001,124801550,124854965,	124585158,124622722,124633027,124736403,124737258,124752049,124794135,124801647,124855885,	3537	TTLL11	tubulin tyrosine ligase-like family, member 11	99	2.65	0.74	155	5.22	1.47	202	4.38	1.23		1.98649	1.66216
CO6A1_HUMAN,	P12109,	2852	NM_001848	chr21	+	47401662	47424963	47401764	47423927	35	47401662,47402547,47404182,47406439,47406857,47407068,47407412,47407523,47408997,47409521,47409665,47410171,47410291,47410686,47410892,47411923,47412077,47412276,47412661,47414080,47417334,47417613,47418034,47418311,47418810,47419066,47419570,47420244,47420672,47421166,47421874,47422131,47422440,47423033,47423304,	47401861,47402677,47404383,47406599,47406986,47407089,47407433,47407568,47409051,47409566,47409692,47410198,47410336,47410740,47410955,47411986,47412131,47412312,47412724,47414143,47417397,47417676,47418085,47418347,47418873,47419132,47419606,47420281,47420681,47421300,47421984,47422315,47422624,47423063,47424963,	4225	COL6A1	collagen, type VI, alpha 1	441	11.82	2.79	693	23.37	5.53	1905	41.33	9.78		1.98208	3.50538
PDZD2_HUMAN,	O15018,	8300	NM_178140	chr5	+	31799030	32111038	31799355	32108241	24	31799030,31983260,31995681,32000244,32010435,32037336,32048644,32052716,32053874,32057760,32057983,32059344,32061107,32069674,32071489,32072266,32073937,32077567,32087236,32093012,32097384,32098469,32101210,32108074,	31799831,31983762,31995824,32000377,32010588,32037448,32048790,32052836,32053989,32057834,32058209,32059462,32061240,32069756,32071524,32072423,32074749,32077712,32091281,32093130,32097486,32098740,32101345,32111038,	11642	PDZD2	PDZ domain containing 2	88	2.35	0.2	135	4.55	0.39	1219	26.44	2.27		1.95	11.35
CACP_HUMAN,	P43155,	17508	NM_000755	chr9	-	131857072	131873070	131857675	131872788	14	131857072,131858276,131859528,131860291,131860527,131860809,131862144,131862789,131864161,131864678,131865291,131866466,131870092,131872761,	131857891,131858414,131859591,131860427,131860650,131860929,131862245,131862968,131864336,131864844,131865345,131866585,131870356,131873070,	2766	CRAT	carnitine O-acetyltransferase	281	7.53	2.72	434	14.64	5.29	743	16.12	5.82		1.94485	2.13971
S17A9_HUMAN,	Q9BYT1,	17541	NM_022082	chr20	+	61583998	61599949	61584182	61598852	13	61583998,61588116,61588792,61591855,61593975,61594624,61594935,61595579,61596483,61596961,61597876,61598054,61598688,	61584241,61588314,61588932,61591955,61594106,61594721,61595032,61595667,61596518,61597077,61597932,61598084,61599949,	2592	SLC17A9	solute carrier family 17, member 9	1002	26.86	10.36	1523	51.37	19.81	1923	41.72	16.09		1.91216	1.55309
Z385A_HUMAN,	Q96PM9,	1240	NM_001130967,NM_001130968,NM_015481	chr12	-	54762919	54785083	54764039	54785028	8	54762919,54764409,54764710,54765256,54767756,54769627,54778211,54785018,	54764270,54764505,54764880,54765499,54767919,54769738,54778481,54785083,	2469	ZNF385A	zinc finger protein 385A	1084	29.06	11.76	1646	55.52	22.48	2116	45.91	18.59		1.91156	1.58078
ADRB2_HUMAN,	P07550,	2702	NM_000024	chr5	+	148206155	148208197	148206394	148207636	1	148206155,	148208197,	2042	ADRB2	adrenergic, beta-2-, receptor, surface	86	2.3	1.12	130	4.38	2.14	255	5.53	2.7		1.91071	2.41071
C4orf50_HUMAN,	Q6ZRC1,	18961	ENST00000324058,ENST00000531445	chr4	-	5958844	5991545	5961101	5991498	7	5958844,5966750,5969140,5975385,5977625,5981900,5990073,	5961353,5966872,5969189,5975568,5977682,5982065,5991545,	4557	C4orf50	chromosome 4 open reading frame 50	78	2.09	0.45	116	3.91	0.85	168	3.64	0.79		1.88889	1.75556
DEDD2_HUMAN,	Q8WXF8,	10822	NM_133328	chr19	-	42702751	42721813	42703589	42721159	5	42702751,42713851,42719284,42720831,42721783,	42703981,42713992,42719404,42721197,42721813,	1887	DEDD2	death effector domain containing 2	1034	27.72	14.68	1529	51.57	27.32	2252	48.86	25.89		1.86104	1.76362
MAD1_HUMAN,	Q05195,	1682	NM_001202513,NM_001202514,NM_002357	chr2	+	70142172	70170076	70142462	70165416	6	70142172,70143252,70148867,70162482,70164366,70165228,	70142535,70143352,70148897,70162597,70164526,70170076,	5616	MXD1	MAX dimerization protein 1	421	11.28	2	620	20.91	3.72	792	17.18	3.05		1.86	1.525
NFAC1_HUMAN,	O95644,	7271	NM_006162,NM_172387,NM_172388,NM_172389,NM_172390	chr18	+	77155771	77289323	77156224	77287577	11	77155771,77160325,77170402,77193578,77208781,77210953,77211675,77221310,77227449,77246247,77287527,	77156351,77160479,77171501,77193738,77208984,77211126,77211816,77221366,77228177,77246937,77289323,	5780	NFATC1	nuclear factor of activated T-cells, cytoplasmic, calcineurin-dependent 1	73	1.95	0.33	106	3.57	0.61	212	4.59	0.79		1.84848	2.39394
LCN10_HUMAN,	Q6JVE6,	1899	NM_001001712	chr9	-	139632618	139637411	139633976	139637355	6	139632618,139634401,139635287,139635703,139636332,139637238,	139634005,139634500,139635395,139635813,139636472,139637411,	2017	LCN10	lipocalin 10	655	17.56	8.7	961	32.41	16.06	1955	42.41	21.02		1.84598	2.41609
SP6_HUMAN,	Q3SY56,	9946	NM_199262	chr17	-	45922279	45933240	45924664	45925795	2	45922279,45933019,	45925852,45933240,	3794	SP6	Sp6 transcription factor	694	18.6	4.9	1017	34.3	9.04	3149	68.32	18		1.8449	3.67347
ACO11_HUMAN,	Q8WXI4,	16614	NM_015547,NM_147161	chr1	+	55013806	55100417	55013982	55100402	18	55013806,55050327,55051507,55058218,55059613,55060228,55062931,55064968,55066941,55068341,55069543,55070018,55070748,55072806,55073614,55074629,55096406,55100360,	55014015,55050535,55051577,55058279,55059712,55060364,55063088,55065088,55067086,55068397,55069610,55070102,55070882,55072938,55073741,55076005,55096559,55100417,	3391	ACOT11	acyl-CoA thioesterase 11	86	2.3	0.67	124	4.18	1.23	212	4.59	1.35		1.83582	2.01493
HSPB1_HUMAN,	P04792,	3569	NM_001540	chr7	+	75931874	75933614	75932029	75933490	3	75931874,75933118,75933300,	75932393,75933182,75933614,	897	HSPB1	heat shock 27kDa protein 1	7472	200.33	223.33	10884	367.16	409.31	16983	368.49	410.8		1.83276	1.83943
ICAM2_HUMAN,	P13598,	2575	NM_000873,NM_001099786,NM_001099787,NM_001099788,NM_001099789	chr17	-	62079954	62097994	62080106	62084051	6	62079954,62081003,62082466,62083990,62085100,62097765,	62080285,62081324,62082733,62084283,62085182,62097994,	1523	ICAM2	intercellular adhesion molecule 2	93	2.49	1.63	135	4.55	2.98	269	5.83	3.82		1.82822	2.34356
SMI19_HUMAN,	Q96E16,	1091	NM_001135674,NM_001135675,NM_001135676,NM_138436	chr8	+	42396297	42408140	42401615	42407751	5	42396297,42396717,42401611,42403798,42407686,	42396342,42397516,42401749,42403923,42408140,	1561	C8orf40	chromosome 8 open reading frame 40	90	2.41	1.54	130	4.38	2.8	222	4.81	3.08		1.81818	2
S6A19_HUMAN,	Q695T7,	11574	NM_001003841	chr5	+	1201709	1225230	1201765	1222019	12	1201709,1208860,1210558,1212417,1213577,1214067,1216672,1216903,1219017,1219619,1221265,1221815,	1201967,1209001,1210696,1212599,1213688,1214180,1216801,1217060,1219222,1219779,1221428,1225230,	5172	SLC6A19	solute carrier family 6 (neutral amino acid transporter), member 19	20	0.53	0.1	28	0.94	0.18	367	7.96	1.53		1.8	15.3
TNR6_HUMAN,	P25445,	17456	NM_000043,NM_152871,NM_152872	chr10	+	90750287	90775542	90750633	90774207	9	90750287,90762785,90767456,90768645,90770295,90770509,90771755,90773099,90773875,	90750663,90762951,90767594,90768754,90770357,90770572,90771838,90773124,90775542,	2689	FAS	Fas (TNF receptor superfamily, member 6)	346	9.27	3.44	491	16.56	6.15	697	15.12	5.62		1.78779	1.63372
MTURN_HUMAN,	Q8N3F0,	7676	NM_152793	chr7	+	30174551	30202381	30174752	30197164	3	30174551,30185792,30197053,	30174914,30185915,30202381,	5814	C7orf41	chromosome 7 open reading frame 41	92	2.46	0.42	130	4.38	0.75	235	5.09	0.87		1.78571	2.07143
TRBM_HUMAN,	P07204,	3643	NM_000361	chr20	-	23026269	23030301	23028413	23030141	1	23026269,	23030301,	4032	THBD	thrombomodulin	210	5.63	1.39	297	10.01	2.48	391	8.48	2.1		1.78417	1.51079
CAH13_HUMAN,	Q8N1Q1,	18276	NM_198584	chr8	+	86157715	86196302	86158057	86193578	7	86157715,86162968,86171649,86178836,86180130,86180700,86193458,	86158094,86163166,86171768,86178932,86180193,86180856,86196302,	3855	CA13	carbonic anhydrase XIII	179	4.79	1.24	253	8.53	2.21	376	8.15	2.11		1.78226	1.70161
SNX10_HUMAN,	Q9Y5X0,	1279	NM_001199835,NM_001199837,NM_001199838,NM_013322	chr7	+	26331514	26413949	26386062	26412192	8	26331514,26386039,26400503,26403944,26404154,26404666,26411440,26412110,	26331753,26386086,26400681,26404122,26404255,26404765,26411653,26413949,	2894	SNX10	sorting nexin 10	250	6.7	2.31	353	11.9	4.11	507	11	3.8		1.77922	1.64502
GLIS1_HUMAN,	Q8NBF1,	4199	NM_147193	chr1	-	53971905	54199877	53972291	54060575	10	53971905,53974792,53975521,53980297,53986306,53990449,53995463,54059780,54065773,54199576,	53972449,53974960,53975700,53980454,53986439,53990560,53995625,54060663,54065951,54199877,	2816	GLIS1	GLIS family zinc finger 1	111	2.97	1.05	156	5.26	1.86	338	7.33	2.6		1.77143	2.47619
RP9_HUMAN,	Q8TA86,	5573	NM_203288	chr7	-	33134409	33149002	33134845	33148984	6	33134409,33136104,33136882,33138918,33140142,33148832,	33135044,33136166,33136974,33139048,33140173,33149002,	1120	RP9	retinitis pigmentosa 9 (autosomal dominant)	140	3.75	3.34	195	6.57	5.86	303	6.57	5.86		1.75449	1.75449
CATZ_HUMAN,	Q9UBR2,	7208	NM_001336	chr20	-	57570241	57582309	57570703	57582183	6	57570241,57571693,57572657,57576519,57581376,57582040,	57570814,57571856,57572808,57576699,57581540,57582309,	1500	CTSZ	cathepsin Z	20329	545.05	363.36	28297	954.57	636.38	42843	929.59	619.72		1.75138	1.70553
PMP22_HUMAN,	Q01453,	8655	NM_000304,NM_153321,NM_153322	chr17	-	15133095	15168644	15134233	15164044	6	15133095,15142787,15162410,15163966,15165745,15168470,	15134397,15142928,15162510,15164093,15165889,15168644,	1988	PMP22	peripheral myelin protein 22	1705	45.71	22.99	2359	79.57	40.02	3230	70.08	35.25		1.74076	1.53328
PPR29_HUMAN,	Q5R3F8,	16640	NM_052906	chr22	-	37763999	37823505	37769111	37771574	3	37763999,37813807,37823332,	37772036,37813958,37823505,	8361	ELFN2	extracellular leucine-rich repeat and fibronectin type III domain containing 2	726	19.46	2.32	990	33.39	3.99	1429	31	3.7		1.71983	1.59483
GLI3_HUMAN,	P10071,	11681	NM_000168	chr7	-	42000547	42276618	42003927	42262852	15	42000547,42007193,42011935,42017156,42018197,42063066,42064862,42065797,42079636,42084982,42088089,42116350,42187824,42262728,42276569,	42006239,42007521,42012226,42017321,42018347,42063207,42064976,42066011,42079838,42085129,42088295,42116456,42188067,42262894,42276618,	8214	GLI3	GLI family zinc finger 3	476	12.76	1.55	646	21.79	2.65	1093	23.71	2.88		1.70968	1.85806
KHK_HUMAN,	P50053,	18282	NM_000221,NM_006488	chr2	+	27309610	27323619	27310127	27322618	9	27309610,27315199,27317344,27317667,27319596,27320370,27322063,27322287,27322532,	27310219,27315316,27317479,27317802,27319669,27320517,27322152,27322445,27323619,	2550	KHK	ketohexokinase (fructokinase)	71	1.9	0.74	96	3.23	1.26	141	3.05	1.19		1.7027	1.60811
ZFN2A_HUMAN,	Q8N6M9,	14253	NM_182491	chr7	-	1192542	1199855	1192704	1197848	5	1192542,1195088,1197291,1197793,1199599,	1192860,1195220,1197386,1197893,1199855,	901	ZFAND2A	zinc finger, AN1-type domain 2A	536	14.37	15.94	723	24.38	27.05	1189	25.79	28.62		1.69699	1.79548
ST5_HUMAN,	P78524,	8390	NM_005418,NM_139157,NM_213618	chr11	-	8714898	8932498	8715642	8772247	24	8714898,8717009,8717973,8719071,8720479,8720759,8724118,8728631,8729323,8732391,8732668,8734097,8735544,8736156,8737149,8739287,8747619,8751496,8772167,8832063,8832793,8860856,8902556,8932367,	8715677,8717096,8718213,8719183,8720521,8720937,8724267,8728772,8729401,8732461,8732778,8734282,8735589,8736253,8737365,8739439,8747756,8752756,8772272,8832224,8832882,8860897,8902656,8932498,	4705	ST5	suppression of tumorigenicity 5	420	11.26	2.39	562	18.95	4.02	802	17.4	3.69		1.68201	1.54393
FKBP9_HUMAN,	O95302,	7847	NM_007270	chr7	+	32997004	33046543	32997185	33044963	10	32997004,33014228,33014793,33015965,33019975,33028118,33035774,33039726,33042287,33044786,	32997406,33014374,33014983,33016111,33020165,33028264,33035961,33039872,33042451,33046543,	3474	FKBP9	FK506 binding protein 9, 63 kDa	516	13.83	3.98	690	23.27	6.69	955	20.72	5.96		1.6809	1.49749
STIP1_HUMAN,	P31948,	2426	NM_006819	chr11	+	63953586	63972020	63953733	63971598	14	63953586,63960549,63961660,63961950,63963116,63964742,63964964,63965325,63967411,63967640,63970347,63970596,63970921,63971525,	63953742,63960759,63961802,63962092,63963285,63964869,63965067,63965446,63967508,63967765,63970384,63970700,63971094,63972020,	2201	STIP1	stress-induced-phosphoprotein 1	18143	486.44	221	24189	815.99	370.73	32821	712.14	323.55		1.67751	1.46403
HS90A_HUMAN,	P07900,	16203	NM_001017963,NM_005348	chr14	-	102547074	102606086	102548048	102605741	13	102547074,102548447,102549370,102549882,102550129,102550735,102551017,102551634,102552094,102552553,102553322,102568211,102605586,	102548158,102548781,102549639,102550030,102550320,102550901,102551335,102551768,102552461,102552715,102553512,102568422,102606086,	4074	HSP90AA1	heat shock protein 90kDa alpha (cytosolic), class A member 1	49209	1319.36	323.84	65467	2208.47	542.08	100953	2190.45	537.66		1.67391	1.66026
LPAR5_HUMAN,	Q9H1C0,	9922	NM_001142961,NM_020400	chr12	-	6728000	6745297	6729295	6730414	3	6728000,6740750,6745072,	6730630,6740815,6745297,	2920	LPAR5	lysophosphatidic acid receptor 5	219	5.87	2.01	287	9.68	3.31	425	9.22	3.15		1.64677	1.56716
PAQR4_HUMAN,	Q8N4S7,	7360	NM_152341	chr16	+	3019341	3023485	3019675	3021949	3	3019341,3021157,3021515,	3019841,3021379,3023485,	2692	PAQR4	progestin and adipoQ receptor family member IV	2042	54.74	20.33	2668	90	33.43	3932	85.31	31.69		1.64437	1.55878
GAGE4_HUMAN,	Q13068,	367	NM_001040663,NM_001468	chrX	+	49363615	49373139	49364777	49370618	6	49363615,49364769,49365326,49368270,49369600,49370595,	49363730,49364861,49365447,49368396,49369743,49373139,	3141	GAGE1	G antigen 1	701	18.79	5.98	911	30.73	9.78	1679	36.43	11.59		1.63545	1.93813
		24710	NR_003277	chr10	-	47133294	47133836	47133836	47133836	1	47133294,	47133836,	542	LOC728643	heterogeneous nuclear ribonucleoprotein A1 pseudogene	383	10.26	18.92	496	16.73	30.86	738	16.01	29.53		1.63108	1.56078
PKHG4_HUMAN,	Q58EX7,	17513	NM_001129727,NM_001129728,NM_001129729,NM_001129731,NM_015432	chr16	+	67311412	67323403	67313947	67322711	21	67311412,67314613,67314784,67314993,67315469,67315626,67315911,67316103,67316405,67316644,67318177,67318615,67319192,67320176,67320347,67320651,67320902,67321800,67322069,67322391,67322705,	67314446,67314709,67314908,67315087,67315547,67315740,67316010,67316252,67316544,67316761,67318360,67319118,67319439,67320266,67320569,67320822,67321080,67321917,67322303,67322507,67323403,	6803	PLEKHG4	pleckstrin homology domain containing, family G (with RhoGef domain) member 4	440	11.79	1.73	570	19.22	2.82	803	17.42	2.56		1.63006	1.47977
CAP2_HUMAN,	P40123,	4174	NM_006366	chr6	+	17393735	17558023	17421786	17556673	13	17393735,17421785,17426820,17463226,17507399,17507871,17514079,17539499,17541203,17543067,17543291,17551694,17556589,	17393977,17421907,17426921,17463304,17507543,17507957,17514185,17539689,17541379,17543191,17543374,17551835,17558023,	3027	CAP2	CAP, adenylate cyclase-associated protein, 2 (yeast)	1078	28.9	9.54	1392	46.95	15.51	2025	43.93	14.51		1.62579	1.52096
HEY2_HUMAN,	Q9UBP5,	2964	NM_012259	chr6	+	126070731	126082415	126070922	126080948	5	126070731,126072946,126073152,126075610,126080262,	126071005,126073025,126073236,126075692,126082415,	2672	HEY2	hairy/enhancer-of-split related with YRPW motif 2	191	5.12	1.91	246	8.29	3.1	347	7.52	2.81		1.62304	1.4712
AF1L1_HUMAN,	Q8TED9,	14335	NM_001146337,NM_152406	chr5	+	148651400	148721367	148651531	148719593	19	148651400,148679071,148679833,148680695,148681980,148685868,148686964,148689518,148691674,148695383,148695713,148697291,148699144,148699953,148702168,148709228,148712257,148715156,148719569,	148651547,148679200,148679917,148680793,148682089,148685967,148687176,148689698,148691767,148695477,148695866,148697503,148699290,148700026,148702280,148709393,148712436,148715285,148721367,	4212	AFAP1L1	actin filament associated protein 1-like 1	49	1.31	0.31	63	2.12	0.5	228	4.94	1.17		1.6129	3.77419
HES7_HUMAN,	Q9BYE0,	481	NM_001165967,NM_032580	chr17	-	8023907	8027410	8024888	8027402	4	8023907,8025660,8026348,8027360,	8025355,8025748,8026444,8027410,	1682	HES7	hairy and enhancer of split 7 (Drosophila)	124	3.32	1.97	157	5.29	3.14	544	11.8	7.01		1.59391	3.55838
LPHN1_HUMAN,	O94910,	11510	NM_001008701,NM_014921	chr19	-	14258548	14316997	14261684	14294414	24	14258548,14262944,14263120,14263328,14263595,14266170,14266921,14267469,14267736,14268062,14268693,14269149,14269901,14270212,14270546,14270923,14271404,14272123,14273417,14277827,14281493,14288342,14294344,14316796,	14262427,14262962,14263249,14263425,14263724,14266339,14267013,14267536,14267957,14268272,14268864,14269364,14270027,14270396,14270585,14271109,14271508,14272438,14274218,14277842,14281603,14288556,14294509,14316997,	7857	LPHN1	latrophilin 1	254	6.81	0.86	320	10.79	1.37	862	18.7	2.38		1.59302	2.76744
MSLN_HUMAN,	Q13421,	14999	NM_001177355,NM_005823,NM_013404	chr16	+	810764	818865	812680	818733	18	810764,811072,812671,813232,813641,814022,814646,814906,815109,815526,815690,816058,816334,816643,816884,817375,818378,818647,	810821,811174,812765,813276,813691,814143,814726,815036,815303,815617,815790,816237,816490,816810,817012,817470,818565,818865,	2193	MSLN	mesothelin	1468	39.35	17.94	1851	62.44	28.47	2670	57.93	26.41		1.58696	1.47213
BPHL_HUMAN,	Q86WA6,	5292	NM_004332	chr6	+	3118925	3153432	3118974	3152809	7	3118925,3123890,3127475,3129278,3137595,3140619,3152721,	3119081,3123994,3127642,3129432,3137727,3140743,3153432,	1548	BPHL	biphenyl hydrolase-like (serine hydrolase)	78	2.09	1.35	98	3.3	2.13	178	3.86	2.49		1.57778	1.84444
STRAB_HUMAN,	Q9C0K7,	9664	NM_001206864,NM_018571	chr2	+	202316391	202345574	202319563	202344898	12	202316391,202319468,202323506,202334675,202337677,202339369,202340341,202342341,202342809,202343079,202344211,202344730,	202316661,202319575,202323587,202334775,202337799,202339478,202340465,202342513,202342914,202343324,202344254,202345574,	2322	STRADB	STE20-related kinase adaptor beta	64	1.71	0.73	80	2.69	1.15	200	4.33	1.86		1.57534	2.54795
		23695	NR_027795	chr6	+	26421618	26430816	26430816	26430816	7	26421618,26422316,26423160,26426469,26428098,26428870,26430165,	26421852,26422425,26423987,26426751,26428335,26429013,26430816,	2483	BTN2A3P	butyrophilin, subfamily 2, member A3, pseudogene	127	3.4	1.36	158	5.32	2.14	244	5.29	2.13		1.57353	1.56618
TENX_HUMAN,	P22105,	6405	NM_019105	chr6	-	32008931	32077151	32009125	32065975	44	32008931,32009547,32009788,32010042,32010231,32010475,32010727,32010951,32011213,32011525,32011783,32012157,32012782,32013951,32015510,32016139,32017046,32017774,32020446,32021164,32023627,32024362,32025834,32029173,32029933,32032597,32035437,32036166,32036598,32037329,32037903,32039766,32041423,32046809,32049144,32049812,32052189,32053526,32056561,32056999,32062852,32063387,32065572,32076957,	32009227,32009711,32009950,32010139,32010383,32010608,32010858,32011095,32011333,32011669,32011906,32012493,32013103,32014233,32015789,32016427,32017364,32018098,32020770,32021482,32023951,32024680,32026167,32029497,32030260,32032894,32035761,32036484,32036913,32037638,32038191,32040075,32041729,32047142,32049450,32050103,32052486,32053895,32056825,32057156,32062968,32065226,32065983,32077151,	13125	TNXB	tenascin XB	38	1.01	0.07	46	1.55	0.11	151	3.27	0.24		1.57143	3.42857
BORG2_HUMAN,	Q9UKI2,	7909	NM_006449	chr2	-	37870742	37899326	37872965	37873730	2	37870742,37898568,	37873965,37899326,	3981	CDC42EP3	CDC42 effector protein (Rho GTPase binding) 3	327	8.76	2.2	407	13.72	3.44	1118	24.25	6.09		1.56364	2.76818
CXB3_HUMAN,	O75712,	6129	NM_001005752,NM_024009	chr1	+	35246789	35251967	35250363	35251176	3	35246789,35247910,35250338,	35247379,35248043,35251967,	2352	GJB3	gap junction protein, beta 3, 31kDa	332	8.9	3.78	412	13.89	5.9	673	14.6	6.2		1.56085	1.64021
KAP1_HUMAN,	P31321,	14145	NM_001164758,NM_001164759,NM_001164760,NM_001164761,NM_001164762,NM_002735	chr7	-	588833	767313	590066	751142	15	588833,591025,618892,624144,635782,645829,647027,716865,720192,750965,752050,752484,752691,766846,767226,	590239,591107,619014,624205,635941,645876,647089,716957,720363,751164,752161,752577,752844,766978,767313,	2977	PRKAR1B	protein kinase, cAMP-dependent, regulatory, type I, beta	957	25.65	8.61	1185	39.97	13.42	1906	41.35	13.88		1.55865	1.61208
P4HA2_HUMAN,	O15460,	17261	NM_001017973,NM_001017974,NM_001142598,NM_001142599,NM_004199	chr5	-	131528303	131563556	131528702	131554319	17	131528303,131530618,131531104,131533898,131534013,131534571,131539440,131539774,131543400,131544830,131545976,131549608,131552889,131553444,131554237,131562389,131563482,	131528773,131530715,131531173,131533964,131534073,131534625,131539540,131539845,131543577,131545024,131546216,131549746,131553041,131553541,131554337,131562935,131563556,	2705	P4HA2	prolyl 4-hydroxylase, alpha polypeptide II	1535	41.15	15.21	1901	64.12	23.7	3204	69.51	25.69		1.55819	1.68902
ID3_HUMAN,	Q02535,	4291	NM_002167	chr1	-	23884420	23886285	23885450	23885917	3	23884420,23885425,23885617,	23884906,23885510,23886285,	1239	ID3	inhibitor of DNA binding 3, dominant negative helix-loop-helix protein	1724	46.22	37.3	2135	72.02	58.12	4950	107.4	86.68		1.55818	2.32386
DNJA4_HUMAN,	Q8WW22,	5865	NM_001130182,NM_001130183,NM_018602	chr15	+	78556486	78574538	78556655	78572802	9	78556486,78556988,78558559,78562838,78565436,78566538,78567839,78572386,78572586,	78556735,78557237,78558635,78563019,78565541,78566766,78568070,78572487,78574538,	3372	DNAJA4	DnaJ (Hsp40) homolog, subfamily A, member 4	2850	76.41	22.66	3518	118.67	35.19	5560	120.63	35.77		1.55296	1.57855
RN135_HUMAN,	Q8IUD6,	8040	NM_001184992,NM_032322,NM_197939	chr17	+	29297955	29326929	29298091	29326209	6	29297955,29311634,29314961,29320857,29324259,29325679,	29298463,29311778,29315124,29320922,29324349,29326929,	2220	RNF135	ring finger protein 135	194	5.2	2.34	239	8.06	3.63	436	9.46	4.26		1.55128	1.82051
LFNG_HUMAN,	Q8NES3,	1269	NM_001040167,NM_001040168,NM_001166355,NM_002304	chr7	+	2552162	2568810	2552288	2568520	13	2552162,2552790,2557496,2558181,2559478,2564328,2564852,2565047,2565318,2565877,2566469,2566779,2568507,	2552335,2552962,2557578,2558232,2559927,2564377,2564952,2565201,2565404,2566043,2566555,2568063,2568810,	3155	LFNG	LFNG O-fucosylpeptide 3-beta-N-acetylglucosaminyltransferase	172	4.61	1.46	212	7.15	2.26	317	6.87	2.17		1.54795	1.4863
ECM1_HUMAN,	Q16610,	8468	NM_001202858,NM_004425,NM_022664	chr1	+	150480486	150486265	150480685	150485943	10	150480486,150482006,150482136,150482310,150482577,150483351,150483932,150484827,150485200,150485712,	150480755,150482057,150482238,150482478,150482658,150483674,150484307,150485048,150485288,150486265,	2231	ECM1	extracellular matrix protein 1	237	6.35	2.84	290	9.78	4.38	444	9.63	4.31		1.54225	1.51761
AT2A3_HUMAN,	Q93084,	2074	NM_005173,NM_174953,NM_174954,NM_174955,NM_174956,NM_174957,NM_174958	chr17	-	3827162	3867758	3828671	3867585	23	3827162,3831274,3831520,3831956,3832621,3833594,3838485,3839560,3840709,3844264,3844729,3845899,3846684,3847997,3848353,3850684,3853804,3853986,3854544,3854874,3856640,3856986,3867467,	3828735,3831332,3831621,3832074,3832739,3833728,3838571,3839763,3840930,3844600,3844948,3846025,3846816,3848100,3848442,3851149,3853890,3854067,3854683,3854979,3856723,3857004,3867758,	4885	ATP2A3	ATPase, Ca++ transporting, ubiquitous	450	12.06	2.46	550	18.55	3.79	915	19.85	4.06		1.54065	1.65041
RPRM_HUMAN,	Q9NS64,	15866	NM_019845	chr2	-	154333851	154335322	154334749	154335079	1	154333851,	154335322,	1471	RPRM	reprimo, TP53 dependent G2 arrest mediator candidate	828	22.19	15.08	1010	34.07	23.16	1499	32.52	22.1		1.53581	1.46552
PHS_HUMAN,	P61457,	16992	NM_000281	chr10	-	72643266	72648541	72643706	72648290	4	72643266,72644908,72645554,72648287,	72643805,72644989,72645686,72648541,	1006	PCBD1	pterin-4 alpha-carbinolamine dehydratase/dimerization cofactor of hepatocyte nuclear factor 1 alpha	1973	52.89	52.57	2404	81.09	80.6	3993	86.63	86.11		1.53319	1.63801
NUDC3_HUMAN,	Q8IVD9,	5492	NM_015332	chr7	-	44421964	44530385	44425609	44530199	6	44421964,44431895,44444038,44467169,44524566,44530007,	44425720,44432084,44444182,44467302,44524883,44530385,	4917	NUDCD3	NudC domain containing 3	2210	59.25	12.05	2677	90.3	18.36	4060	88.09	17.91		1.52365	1.48631
BACE1_HUMAN,	P56817,	7205	NM_001207048,NM_001207049,NM_012104,NM_138971,NM_138972,NM_138973	chr11	-	117156401	117186972	117160281	117186511	10	117156401,117161203,117161615,117162427,117163769,117164586,117165846,117166213,117167588,117186250,	117160523,117161375,117161765,117162529,117163904,117164724,117166063,117166386,117167677,117186972,	6020	BACE1	beta-site APP-cleaving enzyme 1	670	17.96	2.98	811	27.35	4.54	1316	28.55	4.74		1.52349	1.5906
PHAG1_HUMAN,	Q9NWQ8,	7338	NM_018440	chr8	-	81880045	82024303	81888778	81905462	9	81880045,81892669,81897010,81899604,81903713,81905337,81942230,81982346,82023825,	81889141,81892729,81897612,81899701,81903765,81905542,81942324,81982405,82024303,	10743	PAG1	phosphoprotein associated with glycosphingolipid microdomains 1	262	7.02	0.65	318	10.72	0.99	721	15.64	1.45		1.52308	2.23077
F120C_HUMAN,	Q9NX05,	7086	NM_017848,NM_198456	chrX	-	54094756	54209714	54099465	54209631	17	54094756,54106664,54107754,54112147,54114187,54117744,54142977,54159124,54160205,54161263,54161960,54162923,54177677,54184121,54185802,54200221,54208932,	54099720,54106722,54107893,54112349,54114397,54117859,54143227,54159296,54160479,54161544,54162037,54163023,54177806,54184204,54186049,54200579,54209714,	8441	FAM120C	family with sequence similarity 120C	450	12.06	1.42	543	18.31	2.16	881	19.11	2.26		1.52113	1.59155
PPID_HUMAN,	Q08752,	11072	NM_005038	chr4	-	159630278	159644552	159630887	159644440	10	159630278,159631779,159631913,159634270,159636448,159636713,159638163,159640331,159642494,159644355,	159630976,159631822,159632000,159634412,159636555,159636836,159638352,159640438,159642635,159644552,	1834	PPID	peptidylprolyl isomerase D	2585	69.3	37.78	3109	104.87	57.18	4874	105.75	57.66		1.5135	1.5262
MYB_HUMAN,	P10242,	17744	NM_001130172,NM_001130173,NM_001161656,NM_001161657,NM_001161658,NM_001161659,NM_001161660,NM_005375	chr6	+	135502452	135540311	135502651	135539118	16	135502452,135507040,135508971,135510928,135511264,135513461,135514975,135515493,135516885,135518098,135520045,135521222,135521427,135522776,135524354,135539001,	135502674,135507158,135509043,135511021,135511485,135513696,135515056,135515598,135517140,135518461,135520188,135521337,135521553,135522887,135524462,135540311,	3678	MYB	v-myb myeloblastosis viral oncogene homolog (avian)	194	5.2	1.41	232	7.82	2.12	351	7.61	2.06		1.50355	1.46099
RFTN1_HUMAN,	Q14699,	18165	NM_015150	chr3	-	16357351	16555222	16358334	16535376	10	16357351,16364882,16368279,16399438,16411582,16419224,16450881,16475357,16535231,16554948,	16358739,16364964,16368383,16399554,16411786,16419609,16450990,16475544,16535384,16555222,	3002	RFTN1	raftlin, lipid raft linker 1	754	20.21	6.73	891	30.05	10	1557	33.78	11.25		1.48588	1.67162
FBCD1_HUMAN,	Q8N539,	17074	NM_001145106,NM_032843	chr9	-	133777824	133814455	133779450	133813994	8	133777824,133780620,133787178,133799130,133799623,133804953,133813922,133814389,	133779710,133780800,133787275,133799267,133799783,133805433,133814239,133814455,	3323	FIBCD1	fibrinogen C domain containing 1	132	3.53	1.06	155	5.22	1.57	257	5.57	1.67		1.48113	1.57547
NCKX1_HUMAN,	O60721,	14479	NM_001254740,NM_004727	chr15	+	65914269	65948598	65916418	65946417	11	65914269,65916292,65930465,65931932,65935242,65936764,65937949,65942719,65944007,65944979,65946167,	65914430,65918308,65930519,65932041,65935344,65936851,65938041,65943280,65944097,65945146,65948598,	5870	SLC24A1	solute carrier family 24 (sodium/potassium/calcium exchanger), member 1	112	3	0.51	131	4.41	0.75	247	5.35	0.91		1.47059	1.78431
OPLA_HUMAN,	O14841,	8438	NM_017570	chr8	-	145106166	145115584	145106226	145114935	28	145106166,145106629,145106816,145106940,145107071,145107351,145107668,145107885,145108111,145109463,145109714,145109931,145110690,145111049,145111287,145111520,145111850,145112110,145112350,145112758,145112912,145113141,145113398,145113675,145113882,145114501,145114764,145115555,	145106373,145106727,145106938,145106979,145107229,145107501,145107803,145108032,145108296,145109638,145109816,145110092,145110842,145111162,145111426,145111658,145112021,145112223,145112616,145112826,145113051,145113307,145113594,145113799,145113982,145114693,145114988,145115584,	4009	OPLAH	5-oxoprolinase (ATP-hydrolysing)	229	6.13	1.52	266	8.97	2.23	566	12.28	3.06		1.46711	2.01316
LRP4_HUMAN,	O75096,	11820	NM_002334	chr11	-	46878267	46940173	46880533	46939930	38	46878267,46884156,46885998,46886669,46889529,46890150,46890538,46893075,46894650,46894925,46896350,46897006,46897354,46898016,46898294,46898749,46900457,46900676,46903252,46905421,46907641,46907875,46910961,46911494,46911827,46914523,46916139,46916716,46917434,46917760,46918419,46920108,46920454,46920937,46921413,46921812,46924333,46939878,	46880866,46884298,46886086,46886737,46889665,46890264,46890683,46893184,46894785,46895144,46896654,46897232,46897517,46898188,46898381,46898890,46900589,46900866,46903454,46905527,46907723,46908084,46911084,46911671,46912045,46914680,46916370,46916842,46917569,46917886,46918545,46920228,46920583,46921054,46921527,46921929,46924480,46940173,	8227	LRP4	low density lipoprotein receptor-related protein 4	2310	61.93	7.52	2691	90.77	11.03	4267	92.58	11.25		1.46676	1.49601
PHOP1_HUMAN,	Q8TCT1,	7247	NM_001143804,NM_178500	chr17	-	47300731	47308128	47301607	47304053	3	47300731,47304008,47307829,	47302493,47304120,47308128,	2173	PHOSPHO1	phosphatase, orphan 1	48	1.28	0.58	55	1.85	0.85	151	3.27	1.5		1.46552	2.58621
NAAA_HUMAN,	Q02083,	5414	NM_001042402,NM_014435	chr4	-	76831807	76862166	76832503	76862102	12	76831807,76834808,76836020,76839913,76841061,76841890,76842103,76846887,76852366,76857261,76861153,76861896,	76832506,76835491,76836138,76839942,76841128,76841953,76842276,76846964,76852457,76857388,76861318,76862166,	2562	NAAA	N-acylethanolamine acid amidase	275	7.37	2.87	319	10.76	4.19	525	11.39	4.44		1.45993	1.54704
S12A6_HUMAN,	Q9UHW9,	11975	NM_001042494,NM_001042495,NM_001042496,NM_001042497,NM_005135,NM_133647	chr15	-	34522196	34630265	34526081	34628881	28	34522196,34527381,34528215,34528908,34529619,34530432,34531165,34532861,34533433,34534302,34536174,34537485,34537893,34542498,34542831,34543099,34544370,34546548,34547462,34548429,34549842,34551013,34553126,34567545,34610761,34628610,34629532,34630161,	34526173,34527515,34528400,34529016,34529751,34530602,34531361,34533030,34533538,34534422,34536273,34537604,34538068,34542556,34542930,34543258,34544585,34546790,34547593,34548484,34549989,34551145,34553221,34567590,34611021,34629045,34629961,34630265,	8295	SLC12A6	solute carrier family 12 (potassium/chloride transporters), member 6	1893	50.75	6.11	2193	73.97	8.91	3514	76.24	9.19		1.45827	1.50409
E2F5_HUMAN,	Q15329,	15846	NM_001083588,NM_001083589,NM_001951	chr8	+	86089618	86126753	86089655	86126097	9	86089618,86099909,86114381,86115328,86118411,86119659,86121376,86124391,86125987,	86089889,86100031,86114491,86115490,86118455,86119724,86121644,86124439,86126753,	1856	E2F5	E2F transcription factor 5, p130-binding	306	8.2	4.41	354	11.94	6.43	773	16.77	9.03		1.45805	2.04762
TPPC9_HUMAN,	Q96Q05,	16141	NM_001160372,NM_031466	chr8	-	140742585	141468678	140743303	141468663	24	140742585,140744221,140898122,140922390,140998933,141034033,141231557,141262875,141285756,141293987,141297706,141301091,141310567,141321346,141370148,141381062,141407718,141415675,141436713,141445210,141449150,141460888,141467737,141468379,	140743471,140744445,140898213,140922544,140999044,141034176,141231682,141263028,141285920,141294120,141297833,141301177,141310713,141321473,141370292,141381279,141407844,141415797,141436740,141445339,141449296,141461482,141467861,141468678,	4598	TRAPPC9	trafficking protein particle complex 9	1300	34.85	7.57	1505	50.76	11.03	2958	64.18	13.95		1.45707	1.8428
XPP3_HUMAN,	Q9NQH7,	492	NM_001204827,NM_022098	chr22	+	41253084	41328823	41253185	41322439	12	41253084,41256681,41257621,41265002,41277773,41282316,41303590,41305125,41310242,41318336,41320365,41322272,	41253249,41256797,41258785,41265119,41278181,41282519,41303653,41305239,41310328,41318517,41320486,41328823,	9289	XPNPEP3	X-prolyl aminopeptidase (aminopeptidase P) 3, putative	612	16.4	1.76	707	23.85	2.56	1170	25.38	2.73		1.45455	1.55114
DPYL2_HUMAN,	Q16555,	14040	NM_001197293,NM_001244604,NM_001386	chr8	+	26371708	26515693	26371841	26513222	16	26371708,26435339,26435920,26439484,26441314,26481658,26484132,26484730,26485387,26492295,26500954,26501465,26505145,26509772,26510747,26513130,	26372195,26435809,26436049,26439573,26441499,26481823,26484194,26484811,26485456,26492416,26501111,26501607,26505316,26509952,26510913,26515693,	5237	DPYSL2	dihydropyrimidinase-like 2	4945	132.58	25.31	5707	192.52	36.76	9693	210.31	40.15		1.45239	1.58633

## Sheet: HeLa FC < 0.7
Downregulated genes under nonstressed conditions in the Hikeshi-KO HeLa cells, compared with WT cells (fold change < 0.7)
																1_HeLa_non-HS (151007_Hiseq3A_l3_009)			2_Hikeshi-KO#1_non-HS (151007_Hiseq3A_l3_010)			3_Hikeshi-KO#2_non-HS (151007_Hiseq3A_l3_011)				non-HS Hikeshi-KO#1/WT	non-HS Hikeshi-KO#2/WT
UniProt Gene Name	UniProt ID	inhouse_ID	name	chromosome	strand	UTR_start	UTR_end	CDS_start	CDS_end	exon num	exon_starts	exon_ends	mRNA_length	symbol	definition	tag	ppm	rpkm	tag	ppm	rpkm	tag	ppm	rpkm		rpkm ratio	rpkm ratio
SSPO_HUMAN,	A2VEC9,	12281	NM_198455	chr7	+	149473130	149531053	149473130	149530918	110	149473130,149473434,149474023,149474272,149474697,149475040,149475869,149476116,149476622,149476666,149477047,149477325,149477866,149479269,149479934,149480194,149480598,149480988,149481915,149481971,149482218,149482571,149483176,149484456,149484754,149484949,149485408,149485654,149485839,149486252,149486688,149487370,149488389,149488562,149488904,149489153,149489386,149489666,149490397,149490653…	149473180,149473617,149474106,149474452,149474942,149475134,149476028,149476196,149476664,149476774,149477219,149477566,149478011,149479387,149480110,149480422,149480764,149481223,149481969,149482104,149482313,149482828,149483311,149484653,149484882,149485059,149485558,149485748,149486009,149486486,149486910,149487607,149488481,149488794,149489057,149489294,149489569,149489817,149490551,149490708…	15579	SSPO	SCO-spondin homolog (Bos taurus)	159	4.26	0.27	0	0	0	2	0.04	0		0	0
TFPI1_HUMAN,	P10646,	8764	NM_001032281,NM_006287	chr2	-	188328957	188419219	188331662	188368495	9	188328957,188332479,188343304,188348850,188349537,188353063,188361607,188368374,188418926,	188331769,188332659,188343530,188348943,188349714,188353102,188361805,188368497,188419219,	4141	TFPI	tissue factor pathway inhibitor (lipoprotein-associated coagulation inhibitor)	242	6.48	1.56	1	0.03	0	4	0.08	0.01		0	0.00641026
NEP_HUMAN,	P08473,	14961	NM_000902,NM_007287,NM_007288,NM_007289	chr3	+	154797435	154901518	154801956	154898248	25	154797435,154797704,154797952,154801946,154802847,154832782,154834267,154834452,154834656,154836534,154855890,154857979,154859779,154860025,154861231,154862147,154864932,154866338,154878178,154884690,154886280,154886520,154889905,154890324,154898148,	154797545,154797790,154798255,154802116,154802883,154832944,154834348,154834548,154834775,154836600,154856025,154858081,154859916,154860119,154861360,154862246,154865013,154866442,154878237,154884810,154886414,154886586,154890001,154890401,154901518,	6032	MME	membrane metallo-endopeptidase	575	15.41	2.55	1	0.03	0	385	8.35	1.38		0	0.541176
A2MG_HUMAN,	P01023,	5241	NM_000014	chr12	-	9220303	9268558	9220418	9268445	36	9220303,9220778,9221335,9222340,9223083,9224954,9225248,9227155,9229351,9229941,9230296,9231839,9232234,9232689,9241795,9242497,9242951,9243796,9246060,9247568,9248134,9251202,9251976,9253739,9254042,9256834,9258831,9259086,9260119,9261916,9262462,9262909,9264754,9264972,9265955,9268359,	9220435,9220820,9221438,9222409,9223174,9225082,9225467,9227379,9229532,9230016,9230453,9231927,9232411,9232773,9241847,9242619,9243078,9244025,9246175,9247680,9248296,9251352,9252119,9253803,9254270,9256996,9258941,9259201,9260240,9262001,9262631,9262930,9264807,9265132,9266139,9268558,	4653	A2M	alpha-2-macroglobulin	1474	39.52	8.49	5	0.16	0.03	147	3.18	0.68		0.00353357	0.0800942
MCTP1_HUMAN,	Q6DN14,	12579	NM_001002796,NM_024717	chr5	-	94042288	94620279	94043200	94620279	24	94042288,94044216,94046522,94050481,94114814,94134717,94204037,94206121,94206576,94207019,94208843,94224583,94230353,94244955,94248510,94253600,94259666,94267657,94275787,94278051,94288922,94353070,94417129,94619559,	94043272,94044314,94046632,94050591,94114868,94134837,94204157,94206196,94206678,94207122,94208946,94224677,94230540,94245086,94248681,94253678,94259726,94267696,94275899,94278131,94289065,94353188,94417545,94620279,	4328	MCTP1	multiple C2 domains, transmembrane 1	169	4.53	1.04	4	0.13	0.03	100	2.16	0.49		0.0288462	0.471154
ETV1_HUMAN,	P50549,	5501	NM_001163147,NM_001163148,NM_001163149,NM_001163150,NM_001163151,NM_001163152,NM_004956	chr7	-	13930855	14031050	13935490	14028677	18	13930855,13940362,13946054,13949256,13950863,13971126,13975332,13978741,14017051,14025740,14026262,14027710,14028632,14028892,14029187,14030177,14030746,14030952,	13935712,13940464,13946224,13949325,13950932,13971374,13975521,13978871,14017105,14026139,14026310,14027798,14028764,14029089,14029642,14030327,14030865,14031050,	7574	ETV1	ets variant 1	373	10	1.32	11	0.37	0.04	36	0.78	0.1		0.030303	0.0757576
PEG10_HUMAN,	Q86TG7,	17780	NM_001040152,NM_001172437,NM_001172438,NM_001184961,NM_001184962,NM_015068	chr7	+	94285636	94299006	94285898	94294994	2	94285636,94292645,	94285903,94299006,	6628	PEG10	paternally expressed 10	3853	103.3	15.58	131	4.41	0.66	100	2.16	0.32		0.042362	0.0205392
IPKB_HUMAN,	Q9C010,	6749	NM_032471,NM_181794,NM_181795	chr6	+	122793061	123047518	123038939	123046340	8	122793061,122798995,122907065,122931376,122954427,122996222,123038931,123046272,	122793186,122799084,122907152,122931680,122954512,122996289,123039108,123047518,	2180	PKIB	protein kinase (cAMP-dependent, catalytic) inhibitor beta	361	9.67	4.43	13	0.43	0.19	8	0.17	0.07		0.0428894	0.0158014
GLHA_HUMAN,	P01215,	18205	NM_000735,NM_001252383	chr6	-	87795215	87804865	87795473	87797918	5	87795215,87795967,87796234,87797830,87804730,	87795551,87796152,87796327,87797925,87804865,	844	CGA	glycoprotein hormones, alpha polypeptide	2104	56.41	66.83	74	2.49	2.95	1070	23.21	27.5		0.0441419	0.411492
RHG32_HUMAN,	A7KAX9,	8278	NM_001142685,NM_014715	chr11	-	128834954	129062093	128838801	129062093	23	128834954,128842347,128844018,128846457,128848664,128850447,128851310,128851723,128855897,128856418,128857917,128868213,128893753,128910822,128932174,128933796,128934735,128936625,128963515,128993340,128994697,129034213,129061977,	128841054,128843327,128844897,128846529,128848810,128850643,128851456,128851831,128855980,128856563,128858020,128868363,128894088,128910904,128932252,128933919,128934828,128936763,128963602,128993425,128994789,129034322,129062093,	10446	ARHGAP32	Rho GTPase activating protein 32	156	4.18	0.4	9	0.3	0.02	27	0.58	0.05		0.05	0.125
SEM3A_HUMAN,	Q14563,	12079	NM_006080	chr7	-	83587658	83824217	83590686	83823902	17	83587658,83592520,83606447,83610636,83614751,83631270,83634654,83636668,83640337,83640498,83643524,83675639,83689780,83739785,83758438,83764109,83823790,	83591142,83592663,83606512,83610794,83614793,83631362,83634874,83636813,83640407,83640613,83643667,83675759,83689874,83739905,83758501,83764267,83824217,	5659	SEMA3A	sema domain, immunoglobulin domain (Ig), short basic domain, secreted, (semaphorin) 3A	116	3.11	0.54	8	0.26	0.04	0	0	0		0.0740741	0
BCL6B_HUMAN,	Q8N143,	14096	NM_181844	chr17	+	6926368	6932961	6926990	6930938	9	6926368,6926978,6927401,6927719,6928394,6929775,6930023,6930268,6930821,	6926418,6927169,6927623,6928082,6928519,6929940,6930154,6930406,6932961,	3525	BCL6B	B-cell CLL/lymphoma 6, member B	283	7.58	2.15	23	0.77	0.21	100	2.16	0.61		0.0976744	0.283721
LIPB2_HUMAN,	Q8ND30,	4450	NM_001256568,NM_001256569,NM_003621	chr11	+	7534995	7674996	7570706	7674449	26	7534995,7570670,7586783,7614362,7618416,7618790,7626964,7631521,7642165,7647007,7649515,7650689,7652155,7654097,7655725,7656782,7660962,7662709,7663528,7669617,7670030,7670377,7670762,7672070,7672886,7674254,	7535352,7570770,7586998,7614455,7618604,7618904,7627246,7631653,7642258,7647122,7649577,7650765,7652259,7654165,7655783,7656824,7661101,7662851,7663657,7669768,7670142,7670466,7670885,7672196,7673075,7674996,	4041	PPFIBP2	PTPRF interacting protein, binding protein 2 (liprin beta 2)	185	4.96	1.22	16	0.53	0.13	139	3.01	0.74		0.106557	0.606557
CO6A3_HUMAN,	P12111,	14770	NM_004369,NM_057164,NM_057165,NM_057166,NM_057167	chr2	-	238232654	238322850	238233416	238305460	44	238232654,238234202,238242092,238243268,238244777,238247657,238249094,238250707,238252992,238253583,238253700,238253823,238255145,238256449,238256991,238257255,238258789,238259772,238261164,238261983,238263541,238265980,238266459,238267163,238267677,238267848,238268004,238268730,238269763,238270381,238271895,238272992,238274340,238275329,238277205,238280259,238283054,238285414,238287278,238289557…	238233457,238234367,238242191,238243532,238245175,238247760,238249793,238250804,238253486,238253595,238253737,238253856,238255208,238256512,238257027,238257306,238258852,238259835,238261227,238262046,238263577,238266034,238266525,238267226,238267731,238267893,238268031,238268802,238269817,238270474,238272041,238273071,238274678,238275929,238277820,238280980,238283663,238285987,238287878,238290142…	10696	COL6A3	collagen, type VI, alpha 3	618	16.56	1.54	58	1.95	0.18	147	3.18	0.29		0.116883	0.188312
FBLN5_HUMAN,	Q9UBX5,	5018	NM_006329	chr14	-	92335754	92414046	92336567	92413573	11	92335754,92343830,92347635,92349297,92353536,92357564,92361293,92403290,92406908,92409250,92413556,	92336729,92344026,92347762,92349420,92353656,92357681,92361416,92403545,92406960,92409305,92414046,	2633	FBLN5	fibulin 5	474	12.7	4.82	52	1.75	0.66	371	8.04	3.05		0.136929	0.63278
PEPL_HUMAN,	O60437,	1999	NM_002705	chr16	-	4932507	4987136	4933384	4987046	22	4932507,4937135,4938102,4938978,4940184,4940728,4941811,4942035,4943213,4943541,4944467,4945261,4945594,4947675,4949013,4949223,4950830,4950964,4952406,4953886,4960850,4986984,	4936048,4937228,4938219,4939062,4940335,4940922,4941950,4942214,4943371,4943639,4944619,4945408,4945717,4947771,4949121,4949385,4950872,4951090,4952527,4954041,4960950,4987136,	6238	PPL	periplakin	785	21.04	3.37	93	3.13	0.5	134	2.9	0.46		0.148368	0.136499
ANGL4_HUMAN,	Q9BY76,	9826	NM_001039667,NM_139314	chr19	+	8429010	8439257	8429205	8438770	7	8429010,8430837,8431085,8434102,8435939,8436124,8438588,	8429523,8430948,8431203,8434216,8436035,8436406,8439257,	1903	ANGPTL4	angiopoietin-like 4	432	11.58	6.08	66	2.22	1.16	273	5.92	3.11		0.190789	0.511513
ZN618_HUMAN,	Q5T7W0,	11960	NM_133374	chr9	+	116638561	116818875	116638660	116812447	14	116638561,116731396,116750600,116764275,116764903,116769629,116770623,116770756,116778392,116778974,116794927,116798579,116810172,116810930,	116638693,116731440,116750860,116764353,116764942,116769719,116770659,116770834,116778452,116779064,116795008,116798657,116810274,116818875,	9113	ZNF618	zinc finger protein 618	455	12.19	1.33	72	2.42	0.26	44	0.95	0.1		0.195489	0.075188
HBE_HUMAN,	P02100,	12690	NM_005330	chr11	-	5289579	5291373	5289698	5291120	3	5289579,5290683,5291028,	5289827,5290906,5291373,	816	HBE1	hemoglobin, epsilon 1	298	7.98	9.77	51	1.72	2.1	243	5.27	6.45		0.214944	0.660184
WNK4_HUMAN,	Q96J92,	4229	NM_032387	chr17	+	40932648	40949084	40932716	40948706	19	40932648,40934775,40935954,40936439,40937114,40937283,40939295,40939795,40940147,40940307,40940698,40945609,40946631,40946789,40947478,40947642,40948140,40948498,40948703,	40933334,40934948,40936175,40936597,40937203,40937500,40939560,40939917,40940206,40940425,40940815,40945747,40946686,40947400,40947539,40948051,40948340,40948596,40949084,	4178	WNK4	WNK lysine deficient protein kinase 4	169	4.53	1.08	36	1.21	0.28	147	3.18	0.76		0.259259	0.703704
VTNC_HUMAN,	P04004,	2212	NM_000638	chr17	-	26694298	26697373	26694389	26697224	8	26694298,26694735,26695541,26695892,26696309,26696527,26696947,26697160,	26694502,26695080,26695694,26696049,26696449,26696872,26697067,26697373,	1677	VTN	vitronectin	114	3.05	1.81	24	0.8	0.47	51	1.1	0.65		0.259669	0.359116
PAR3_HUMAN,	O00254,	11827	NM_001256566,NM_004101	chr5	-	75911306	75919259	75913406	75919055	2	75911306,75918991,	75914467,75919259,	3429	F2RL2	coagulation factor II (thrombin) receptor-like 2	194	5.2	1.51	44	1.48	0.43	165	3.58	1.04		0.284768	0.688742
DDR2_HUMAN,	Q16832,	3615	NM_001014796,NM_006182	chr1	+	162602227	162750247	162688853	162750036	19	162602227,162625000,162674841,162688826,162722884,162724413,162724945,162725453,162729585,162731000,162735790,162737018,162740091,162741813,162743258,162745441,162745925,162748369,162749901,	162602421,162625164,162674921,162688935,162722987,162724645,162725093,162725559,162729769,162731244,162735853,162737149,162740302,162742037,162743386,162745633,162746160,162748519,162750247,	3244	DDR2	discoidin domain receptor tyrosine kinase 2	212	5.68	1.75	49	1.65	0.5	15	0.32	0.09		0.285714	0.0514286
I20RB_HUMAN,	Q6UXL0,	13971	NM_144717	chr3	+	136676706	136729926	136676955	136729065	7	136676706,136699307,136701001,136708282,136710779,136714255,136728954,	136677043,136699434,136701192,136708407,136710930,136714398,136729926,	2046	IL20RB	interleukin 20 receptor beta	219	5.87	2.86	52	1.75	0.85	101	2.19	1.07		0.297203	0.374126
DAPK2_HUMAN,	Q9UIK4,	605	NM_014326	chr15	-	64199234	64338521	64200718	64332460	12	64199234,64204106,64204306,64217014,64218139,64221749,64222605,64231430,64263621,64275731,64332368,64338496,	64200799,64204190,64204396,64217060,64218292,64221776,64222654,64231560,64263760,64275953,64332466,64338521,	2628	DAPK2	death-associated protein kinase 2	188	5.04	1.91	48	1.61	0.61	173	3.75	1.42		0.319372	0.743455
HIKES_HUMAN,	Q53FT3,	13076	NM_016401	chr11	+	86013252	86056985	86013490	86056680	5	86013252,86017286,86048420,86055644,86056625,	86013520,86017524,86048572,86055763,86056985,	1137	C11orf73	chromosome 11 open reading frame 73	729	19.54	17.18	193	6.51	5.72	71	1.54	1.35		0.332945	0.0785797
OSBL6_HUMAN,	Q9BZF3,	13508	NM_001201480,NM_001201481,NM_001201482,NM_032523,NM_145739	chr2	+	179059207	179264160	179170911	179260286	27	179059207,179149653,179170756,179184970,179188903,179192982,179196278,179197367,179197597,179201027,179203717,179204398,179209012,179213950,179226408,179236852,179238616,179247146,179247750,179248765,179250184,179251787,179253735,179255799,179257138,179259039,179260177,	179059401,179149848,179171013,179185129,179188996,179193105,179196332,179197481,179197768,179201160,179203821,179204491,179209087,179214116,179226542,179236960,179238754,179247234,179248004,179248903,179250248,179251866,179253880,179255944,179257265,179259162,179264160,	7457	OSBPL6	oxysterol binding protein-like 6	150	4.02	0.53	42	1.41	0.18	116	2.51	0.33		0.339623	0.622642
P2R3A_HUMAN,	Q06190,	12694	NM_001190447,NM_002718,NM_181897	chr3	+	135684514	135866752	135720340	135864008	15	135684514,135719900,135741576,135745673,135759700,135768100,135789319,135797208,135801106,135806724,135809419,135820848,135822099,135825057,135863884,	135684691,135722335,135742043,135745940,135759804,135768203,135789394,135797295,135801263,135806773,135809509,135821024,135822218,135825164,135866752,	7281	PPP2R3A	protein phosphatase 2, regulatory subunit B'', alpha	208	5.57	0.76	57	1.92	0.26	124	2.69	0.36		0.342105	0.473684
CR3L1_HUMAN,	Q96BA8,	11804	NM_052854	chr11	+	46299227	46342972	46299662	46342296	12	46299227,46321485,46329366,46331539,46332582,46333875,46334162,46334401,46337836,46338911,46341814,46342259,	46299764,46321714,46329551,46331618,46332740,46334025,46334221,46334470,46337936,46339038,46342079,46342972,	2671	CREB3L1	cAMP responsive element binding protein 3-like 1	136	3.64	1.36	38	1.28	0.47	41	0.88	0.32		0.345588	0.235294
OLR1_HUMAN,	P78380,	12183	NM_001172632,NM_001172633,NM_002543	chr12	-	10310898	10324790	10312478	10324676	6	10310898,10312945,10313384,10319310,10321672,10324600,	10312620,10313061,10313524,10319556,10321774,10324790,	2516	OLR1	oxidized low density lipoprotein (lectin-like) receptor 1	282	7.56	3	79	2.66	1.05	12	0.26	0.1		0.35	0.0333333
HDAC9_HUMAN,	Q9UKV0,	8849	NM_001204144,NM_001204145,NM_001204146,NM_001204147,NM_001204148,NM_014707,NM_058176,NM_178423,NM_178425	chr7	+	18126571	19036992	18201947	19035685	30	18126571,18201851,18498464,18535368,18535884,18548899,18624903,18629958,18631138,18633530,18668972,18674249,18684293,18687407,18688088,18705835,18767202,18788627,18801779,18806728,18832967,18868783,18869083,18875089,18875522,18914100,18975431,18993768,19015428,19035645,	18126836,18201972,18498524,18535646,18535947,18549069,18625145,18630109,18631265,18633652,18669104,18674365,18684416,18687621,18688306,18708466,18767380,18788761,18801900,18806778,18833075,18868839,18869171,18875209,18875620,18914219,18975565,18993939,19015576,19036992,	7905	HDAC9	histone deacetylase 9	322	8.63	1.09	95	3.2	0.4	60	1.3	0.16		0.366972	0.146789
PD1L1_HUMAN,	Q9NZQ7,	11648	NM_014143	chr9	+	5450502	5470567	5456113	5467862	7	5450502,5456099,5457078,5462833,5465498,5466769,5467839,	5450596,5456165,5457420,5463121,5465606,5466829,5470567,	3686	CD274	CD274 molecule	132	3.53	0.95	39	1.31	0.35	60	1.3	0.35		0.368421	0.368421
SHPS1_HUMAN,	P78324,	10350	NM_001040022,NM_001040023,NM_080792	chr20	+	1874812	1920540	1876093	1918214	10	1874812,1875424,1875825,1895744,1902040,1902958,1905409,1908520,1915360,1917965,	1875163,1875442,1876172,1896101,1902358,1903291,1905523,1908545,1915400,1920540,	4478	SIRPA	signal-regulatory protein alpha	198	5.3	1.18	61	2.05	0.45	162	3.51	0.78		0.381356	0.661017
DJC25_HUMAN,	Q9H1X3,	15762	NM_004125	chr9	+	114393631	114432526	114393687	114429220	3	114393631,114429094,114431551,	114394023,114429226,114432526,	1499	DNAJC25-GNG10	DNAJC25-GNG10 readthrough	145	3.88	2.58	45	1.51	1	93	2.01	1.34		0.387597	0.51938
ST1A2_HUMAN,	P50226,	8808	NM_001054,NM_177528	chr16	-	28603263	28608391	28603348	28607251	9	28603263,28603583,28604572,28604762,28606687,28606870,28607103,28607454,28608317,	28603461,28603764,28604667,28604889,28606785,28606996,28607255,28607801,28608391,	1398	SULT1A2	sulfotransferase family, cytosolic, 1A, phenol-preferring, member 2	122	3.27	2.33	38	1.28	0.91	105	2.27	1.62		0.390558	0.695279
CC71L_HUMAN,	Q8N9Z2,	510	NM_175884	chr7	-	106297210	106301634	106300634	106301342	1	106297210,	106301634,	4424	CCDC71L	coiled-coil domain containing 71-like	112	3	0.67	36	1.21	0.27	59	1.28	0.28		0.402985	0.41791
		23163	NR_037868	chr1	+	41480261	41509562	41509562	41509562	4	41480261,41494204,41503717,41508786,	41484073,41494384,41503749,41509562,	4800	LOC100507178	uncharacterized LOC100507178	176	4.71	0.98	58	1.95	0.4	124	2.69	0.56		0.408163	0.571429
CK086_HUMAN,	A6NJI1,	3300	NM_001136485	chr11	+	66742753	66744479	66742833	66743722	2	66742753,66743650,	66743109,66744479,	1185	C11orf86	chromosome 11 open reading frame 86	315	8.44	7.12	107	3.6	3.03	256	5.55	4.68		0.425562	0.657303
F102B_HUMAN,	Q5T8I3,	2961	NM_001010883	chr1	+	109102970	109181949	109103050	109177772	11	109102970,109143187,109148844,109154799,109159003,109167266,109170788,109171016,109171298,109172209,109177729,	109103187,109143308,109148874,109154916,109159050,109167370,109170884,109171206,109171426,109172279,109181949,	5340	FAM102B	family with sequence similarity 102, member B	5127	137.46	25.74	1757	59.27	11.09	3913	84.9	15.89		0.430847	0.617327
DEFI6_HUMAN,	Q9H4E7,	7551	NM_022047	chr6	+	35265594	35289548	35265633	35289187	11	35265594,35277446,35278235,35280078,35280402,35285667,35285949,35287300,35287595,35288660,35288963,	35265729,35277587,35278421,35280315,35280549,35285776,35286248,35287467,35287794,35288751,35289548,	2296	DEF6	differentially expressed in FDCP 6 homolog (mouse)	293	7.85	3.41	101	3.4	1.48	236	5.12	2.22		0.434018	0.651026
AOC1_HUMAN,	P19801,	9682	NM_001091	chr7	+	150549572	150558379	150553558	150558297	5	150549572,150553542,150555850,150557588,150558030,	150549646,150555128,150556136,150557721,150558379,	2428	ABP1	amiloride binding protein 1 (amine oxidase (copper-containing))	662	17.74	7.3	234	7.89	3.24	84	1.82	0.74		0.443836	0.10137
ISK5_HUMAN,	Q9NQ38,	5243	NM_001127698,NM_001127699,NM_006846	chr5	+	147443534	147516925	147443607	147516554	34	147443534,147444909,147449885,147451710,147465967,147468104,147469056,147470727,147473916,147475380,147477429,147478796,147480016,147480917,147481343,147484514,147486599,147488315,147491330,147492430,147493924,147495932,147497999,147498548,147499571,147499857,147503395,147504327,147505086,147505285,147506545,147510821,147513359,147516545,	147443662,147444935,147450013,147451783,147466095,147468168,147469184,147470791,147474044,147475468,147477557,147478878,147480144,147480999,147481471,147484563,147486727,147488400,147491458,147492497,147494052,147496029,147498127,147498621,147499699,147499954,147503523,147504503,147505176,147505413,147506642,147510952,147513450,147516925,	3832	SPINK5	serine peptidase inhibitor, Kazal type 5	397	10.64	2.77	140	4.72	1.23	241	5.22	1.36		0.444043	0.490975
NCPR_HUMAN,	P16435,	6218	NM_000941	chr7	+	75544419	75616173	75583310	75615799	16	75544419,75583306,75601730,75608768,75609656,75610365,75610834,75611541,75612837,75613055,75614094,75614375,75614896,75615240,75615476,75615654,	75544497,75583498,75601779,75608897,75609806,75610490,75610924,75611640,75612954,75613174,75614276,75614525,75615167,75615386,75615559,75616173,	2499	POR	P450 (cytochrome) oxidoreductase	6058	162.42	64.99	2248	75.83	30.34	5238	113.65	45.47		0.466841	0.699646
ASIC3_HUMAN,	Q9UHC3,	3158	NM_004769,NM_020321,NM_020322	chr7	+	150745604	150749843	150745972	150749834	11	150745604,150747192,150747567,150747844,150748125,150748258,150748896,150749069,150749252,150749502,150749640,	150746506,150747343,150747695,150748040,150748182,150748406,150748988,150749149,150749324,150749561,150749843,	2088	ASIC3	acid-sensing (proton-gated) ion channel 3	165	4.42	2.11	62	2.09	1	133	2.88	1.37		0.473934	0.649289
PDE5A_HUMAN,	O76074,	508	NM_001083,NM_033430,NM_033437	chr4	-	120415549	120549981	120419755	120549826	23	120415549,120422324,120423735,120425690,120427009,120428758,120432201,120440199,120442089,120446703,120460114,120463613,120473704,120474792,120481450,120483987,120486475,120488227,120517677,120527863,120548304,120549149,120549674,	120419893,120422408,120423810,120425754,120427087,120428859,120432289,120440294,120442215,120446850,120460174,120463789,120473792,120474901,120481518,120484125,120486565,120488299,120517767,120528452,120548442,120549239,120549981,	7217	PDE5A	phosphodiesterase 5A, cGMP-specific	279	7.48	1.03	109	3.67	0.5	170	3.68	0.5		0.485437	0.485437
ST1A1_HUMAN,	P50225,	5741	NM_001055,NM_177529,NM_177530,NM_177534,NM_177536	chr16	-	28616907	28634907	28617141	28634518	10	28616907,28617376,28618081,28618271,28619611,28619798,28620028,28621251,28631383,28634451,	28617254,28617557,28618176,28618398,28619709,28619924,28620649,28621365,28631454,28634907,	2236	SULT1A1	sulfotransferase family, cytosolic, 1A, phenol-preferring, member 1	870	23.32	10.42	340	11.46	5.12	656	14.23	6.36		0.491363	0.610365
FGF12_HUMAN,	P61328,	4401	NM_004113,NM_021032	chr3	-	191857181	192445388	191861797	192444982	7	191857181,191888246,192053149,192078216,192125813,192444969,192445272,	191861916,191888445,192053253,192078327,192126838,192445112,192445388,	6433	FGF12	fibroblast growth factor 12	213	5.71	0.88	85	2.86	0.44	12	0.26	0.04		0.5	0.0454545
PCDH7_HUMAN,	O60245,	8889	NM_001173523,NM_002589,NM_032456,NM_032457	chr4	+	30722029	31148423	30723044	31144471	4	30722029,30732374,30921774,31144094,	30726957,30732838,30921991,31148423,	9938	PCDH7	protocadherin 7	1639	43.94	4.42	655	22.09	2.22	1122	24.34	2.44		0.502262	0.552036
PUS3_HUMAN,	Q9BZE2,	2131	NM_031307	chr11	-	125763379	125773116	125763679	125766179	4	125763379,125765118,125765801,125773064,	125764181,125765684,125766225,125773116,	1844	PUS3	pseudouridylate synthase 3	689	18.47	10.01	276	9.31	5.04	514	11.15	6.04		0.503497	0.603397
AOC3_HUMAN,	Q16853,	12596	NM_003734	chr17	+	41003200	41010140	41003360	41008567	4	41003200,41006464,41007460,41008291,	41004960,41006750,41007590,41010140,	4025	AOC3	amine oxidase, copper containing 3 (vascular adhesion protein 1)	119	3.19	0.79	48	1.61	0.4	78	1.69	0.41		0.506329	0.518987
TXNIP_HUMAN,	Q9H3M7,	11073	NM_006472	chr1	+	145438461	145442628	145438802	145441218	8	145438461,145439592,145439777,145440037,145440268,145440631,145440901,145441182,	145439052,145439665,145439925,145440140,145440525,145440788,145441053,145442628,	2927	TXNIP	thioredoxin interacting protein	416	11.15	3.8	168	5.66	1.93	367	7.96	2.71		0.507895	0.713158
		56333	AK001932,AK023809	chr1	+	147751405	147763966	147751405	147763966	2	147751405,147759795,	147751649,147763966,	4415	LOC284561	uncharacterized LOC284561	354	9.49	2.14	143	4.82	1.09	251	5.44	1.23		0.509346	0.574766
CPSM_HUMAN,	P31327,	13280	NM_001122633,NM_001122634,NM_001875	chr2	+	211342405	211543831	211342487	211542709	40	211342405,211421322,211438021,211441069,211442144,211444437,211447340,211452781,211454829,211455523,211456554,211457602,211458078,211459231,211460210,211464095,211465278,211466925,211469825,211471454,211473084,211476840,211481146,211502425,211503873,211504719,211507207,211512586,211513196,211515086,211518748,211521248,211523322,211525208,211527846,211532909,211539625,211540451,211541730,211542610,	211342490,211421583,211438131,211441214,211442234,211444494,211447433,211452871,211454958,211455630,211456693,211457680,211458398,211459330,211460306,211464285,211465436,211467054,211469970,211471665,211473283,211477017,211481265,211502567,211503939,211504783,211507389,211512781,211513264,211515162,211518826,211521356,211523412,211525379,211527921,211533008,211539685,211540564,211541860,211543831,	6165	CPS1	carbamoyl-phosphate synthase 1, mitochondrial	39088	1048.01	169.99	15872	535.42	86.84	2499	54.22	8.79		0.510854	0.0517089
ALDOC_HUMAN,	P09972,	3932	NM_005165	chr17	-	26900132	26903951	26900543	26902550	9	26900132,26900752,26901084,26901511,26901713,26901969,26902140,26902438,26903818,	26900639,26900952,26901259,26901595,26901874,26902024,26902352,26902562,26903951,	1651	ALDOC	aldolase C, fructose-bisphosphate	1438	38.55	23.34	588	19.83	12.01	929	20.15	12.2		0.514567	0.522708
HABP4_HUMAN,	Q5JVS0,	11974	NM_014282	chr9	+	99212413	99253618	99212561	99252320	8	99212413,99220660,99227618,99227991,99233292,99246743,99250370,99252263,	99212910,99220823,99227780,99228060,99233376,99246915,99250556,99253618,	2688	HABP4	hyaluronan binding protein 4	1404	37.64	14	579	19.53	7.26	1229	26.66	9.91		0.518571	0.707857
RCOR2_HUMAN,	Q8IZ40,	17268	NM_173587	chr11	-	63678692	63684316	63679336	63683928	12	63678692,63679776,63680147,63680341,63681425,63681732,63681888,63682126,63682373,63682649,63683026,63683801,	63679651,63680006,63680205,63680419,63681641,63681802,63682013,63682288,63682426,63682730,63683083,63684316,	2604	RCOR2	REST corepressor 2	191	5.12	1.96	79	2.66	1.02	136	2.95	1.13		0.520408	0.576531
INSL4_HUMAN,	Q14641,	9708	NM_002195	chr9	+	5231418	5233967	5231523	5233877	2	5231418,5233653,	5231719,5233967,	615	INSL4	insulin-like 4 (placenta)	164	4.39	7.13	68	2.29	3.72	67	1.45	2.35		0.521739	0.329593
TT39B_HUMAN,	Q5VTQ0,	2033	NM_001168339,NM_001168340,NM_001168341,NM_001168342,NM_152574	chr9	-	15170841	15307358	15172016	15307321	21	15170841,15175016,15177694,15182304,15185277,15186941,15187968,15189571,15189701,15190551,15191187,15192587,15199858,15203820,15210085,15211263,15214136,15225914,15249915,15267911,15307081,	15172107,15175133,15177812,15182413,15185404,15187033,15188130,15189631,15189790,15190660,15191253,15192693,15199923,15203888,15210162,15211395,15214247,15226010,15250198,15267946,15307358,	3565	TTC39B	tetratricopeptide repeat domain 39B	194	5.2	1.45	81	2.73	0.76	139	3.01	0.84		0.524138	0.57931
CLD1_HUMAN,	O95832,	6586	NM_021101	chr3	-	190023489	190040235	190026065	190039995	4	190023489,190027957,190030660,190039772,	190026228,190028042,190030825,190040235,	3452	CLDN1	claudin 1	313	8.39	2.43	132	4.45	1.28	220	4.77	1.38		0.526749	0.567901
PLIN4_HUMAN,	Q96Q06,	1555	NM_001080400	chr19	-	4502191	4517716	4504470	4517716	6	4502191,4504872,4508779,4510457,4516628,4517565,	4504797,4504959,4508967,4513716,4516690,4517716,	6353	PLIN4	perilipin 4	236	6.32	0.99	101	3.4	0.53	108	2.34	0.36		0.535354	0.363636
ALG9_HUMAN,	Q9H6U8,	18073	NM_001077690,NM_001077691,NM_001077692,NM_024740	chr11	-	111652918	111742305	111657120	111742206	17	111652918,111680366,111706887,111708190,111708971,111711377,111715323,111724102,111724371,111728324,111731269,111735903,111739324,111740954,111741497,111742074,111742146,	111657244,111680497,111707017,111708338,111709122,111711532,111715446,111724208,111724459,111728460,111731358,111735974,111739459,111741093,111742004,111742145,111742305,	6665	ALG9	asparagine-linked glycosylation 9, alpha-1,2-mannosyltransferase homolog (S. cerevisiae)	2075	55.63	8.34	885	29.85	4.47	1594	34.58	5.18		0.535971	0.621103
IL1AP_HUMAN,	Q9NPH3,	12303	NM_001167928,NM_001167929,NM_001167930,NM_001167931,NM_002182,NM_134470	chr3	+	190231839	190374986	190282078	190374396	14	190231839,190268130,190273918,190282077,190321916,190326783,190338063,190341132,190345111,190347138,190362036,190363487,190366126,190373677,	190232008,190268294,190274005,190282142,190322202,190326970,190338229,190341204,190345238,190348073,190362186,190363631,190369308,190374986,	7043	IL1RAP	interleukin 1 receptor accessory protein	511	13.7	1.94	221	7.45	1.05	415	9	1.27		0.541237	0.654639
INHBE_HUMAN,	P58166,	669	NM_031479	chr12	+	57849095	57851791	57849319	57850631	2	57849095,57849876,	57849617,57851791,	2437	INHBE	inhibin, beta E	126	3.37	1.38	55	1.85	0.75	90	1.95	0.8		0.543478	0.57971
ANXA1_HUMAN,	P04083,	16635	NM_000700	chr9	+	75766780	75785307	75773451	75785023	13	75766780,75773437,75773610,75774244,75775178,75775718,75777697,75778391,75780031,75781012,75782412,75783947,75784966,	75766840,75773517,75773719,75774339,75775292,75775809,75777777,75778448,75780125,75781108,75782471,75784070,75785307,	1399	ANXA1	annexin A1	5297	142.02	101.51	2294	77.38	55.31	1595	34.6	24.73		0.544872	0.243621
TEFF1_HUMAN,	Q8IYR6,	9540	NM_003692	chr9	+	103235519	103339918	103235826	103338882	10	103235519,103261046,103271286,103275588,103278956,103310025,103312376,103323678,103334799,103338797,	103236022,103261156,103271416,103275615,103279053,103310174,103312442,103323802,103334958,103339918,	2486	TMEFF1	transmembrane protein with EGF-like and two follistatin-like domains 1	176	4.71	1.89	79	2.66	1.06	98	2.12	0.85		0.560847	0.449735
PPM1L_HUMAN,	Q5SGD2,	4127	NM_139245	chr3	+	160473995	160788817	160474096	160786945	4	160473995,160679523,160783190,160786598,	160474495,160679698,160783352,160788817,	3056	PPM1L	protein phosphatase, Mg2+/Mn2+ dependent, 1L	305	8.17	2.67	138	4.65	1.52	127	2.75	0.89		0.569288	0.333333
AOC2_HUMAN,	O75106,	12782	NM_001158,NM_009590	chr17	+	40996608	41002724	40996643	41002365	4	40996608,41001102,41001617,41002098,	40998231,41001388,41001747,41002724,	2665	AOC2	amine oxidase, copper containing 2 (retina-specific)	239	6.4	2.4	109	3.67	1.37	169	3.66	1.37		0.570833	0.570833
		19260	ENST00000283050,ENST00000331436,ENST00000381497,ENST00000524823,ENST00000527703,ENST00000534258,ENST00000535961,ENST00000536260,ENST00000537085,ENST00000537112,ENST00000538085,ENST00000540039,ENST00000541593	chr16	+	16411300	16444447	16412832	16444443	36	16411300,16411752,16412407,16412779,16413305,16413787,16414508,16416161,16416384,16416484,16417012,16418240,16418511,16418884,16419164,16419714,16420721,16421592,16422507,16422844,16423221,16424914,16425171,16425409,16425710,16427503,16429717,16430533,16431253,16434162,16437901,16438164,16441259,16442383,16442553,16443948,	16411634,16411936,16412591,16412895,16413432,16414035,16415264,16416294,16416408,16416660,16417146,16418384,16418791,16419098,16419324,16419867,16420866,16422055,16422664,16423097,16423417,16425085,16425315,16425620,16425837,16427741,16429994,16430699,16431383,16434358,16438001,16438309,16441490,16442444,16443173,16444447,	7897	PKD1P1	polycystic kidney disease 1 (autosomal dominant) pseudogene 1	191	5.12	0.64	89	3	0.37	153	3.31	0.41		0.578125	0.640625
		24949	NR_038848	chr5	+	27472398	27496508	27496508	27496508	5	27472398,27475641,27477745,27494341,27496055,	27472626,27475802,27477908,27494442,27496508,	1106	LOC643401	uncharacterized LOC643401	299	8.01	7.24	140	4.72	4.26	194	4.2	3.79		0.588398	0.523481
AT11B_HUMAN,	Q9Y2G3,	16726	NM_014616	chr3	+	182511290	182639421	182511547	182635892	30	182511290,182538047,182545907,182547459,182553822,182554129,182554858,182559862,182563245,182566263,182575665,182576949,182583243,182584055,182585163,182586865,182587015,182590143,182591599,182597283,182598666,182602540,182603738,182605373,182607197,182614487,182615090,182616394,182631648,182635810,	182511574,182538164,182545997,182547540,182553930,182554258,182554962,182559910,182563310,182566345,182575816,182577147,182583486,182584231,182585232,182586939,182587119,182590325,182591803,182597437,182598769,182602686,182603798,182605501,182607336,182614553,182615194,182616560,182631782,182639421,	7320	ATP11B	ATPase, class VI, type 11B	5679	152.26	20.8	2666	89.93	12.28	5206	112.95	15.43		0.590385	0.741827
VASH2_HUMAN,	Q86V25,	39	NM_001136474,NM_001136475,NM_024749	chr1	+	213123886	213164927	213124884	213161926	8	213123886,213124680,213134507,213139063,213139612,213145921,213147296,213161853,	213124082,213125160,213134596,213139120,213139687,213146303,213147412,213164927,	4469	VASH2	vasohibin 2	128	3.43	0.76	60	2.02	0.45	88	1.9	0.42		0.592105	0.552632
SDHF3_HUMAN,	Q9NRP4,	7765	NM_020186	chr7	+	96745904	96811075	96747035	96810527	2	96745904,96810323,	96747209,96811075,	2057	ACN9	ACN9 homolog (S. cerevisiae)	524	14.04	6.82	247	8.33	4.04	393	8.52	4.14		0.592375	0.607038
TYW2_HUMAN,	Q53H54,	1278	NM_017956	chr8	+	125463047	125465266	125463168	125464515	1	125463047,	125465266,	2219	TRMT12	tRNA methyltransferase 12 homolog (S. cerevisiae)	179	4.79	2.15	85	2.86	1.28	152	3.29	1.48		0.595349	0.688372
PLCC_HUMAN,	Q9NRZ7,	6895	NM_001037553,NM_020132	chr21	+	45285115	45407475	45379562	45402273	11	45285115,45323837,45345278,45379514,45387826,45388998,45390533,45391268,45397926,45400869,45402184,	45285226,45323900,45345332,45379740,45387996,45389160,45390687,45391371,45398002,45401068,45407475,	6609	AGPAT3	1-acylglycerol-3-phosphate O-acyltransferase 3	1548	41.5	6.27	735	24.79	3.75	1029	22.32	3.37		0.598086	0.53748
CAH5B_HUMAN,	Q9Y2D0,	13247	NM_007220	chrX	+	15756411	15805748	15768146	15800787	8	15756411,15768093,15782700,15790618,15792424,15793368,15794836,15800607,	15756475,15768288,15782898,15790737,15792520,15793431,15794992,15805748,	6032	CA5B	carbonic anhydrase VB, mitochondrial	722	19.35	3.2	344	11.6	1.92	634	13.75	2.27		0.6	0.709375
MLXPL_HUMAN,	Q9NP71,	7600	NM_032951,NM_032952,NM_032953,NM_032954	chr7	-	73007523	73038870	73008194	73038822	17	73007523,73008603,73009966,73010171,73010482,73010693,73010968,73011194,73011511,73013855,73020017,73020239,73021303,73021660,73021919,73030400,73038529,	73008313,73008733,73010090,73010299,73010602,73010809,73011119,73011262,73012043,73014025,73020098,73020441,73021348,73021750,73022002,73030507,73038870,	3278	MLXIPL	MLX interacting protein-like	237	6.35	1.93	115	3.87	1.18	175	3.79	1.15		0.611399	0.595855
MET25_HUMAN,	Q8N6Q8,	1582	NM_032230	chr12	+	82752275	82873016	82752344	82872803	12	82752275,82780581,82783594,82792573,82796761,82824671,82828473,82832496,82850505,82870422,82871059,82872710,	82752603,82780746,82783701,82793173,82796909,82824766,82828503,82832570,82850599,82870497,82871131,82873016,	2094	C12orf26	chromosome 12 open reading frame 26	123	3.29	1.57	60	2.02	0.96	106	2.29	1.09		0.611465	0.694268
GLT10_HUMAN,	Q86SR1,	12888	NM_198321	chr5	+	153570294	153800543	153570426	153796532	12	153570294,153674375,153677500,153709131,153755836,153760007,153765872,153783663,153789100,153792448,153795342,153796373,	153570585,153674478,153677639,153709298,153756022,153760191,153765990,153783771,153789322,153792565,153795492,153800543,	5955	GALNT10	UDP-N-acetyl-alpha-D-galactosamine:polypeptide N-acetylgalactosaminyltransferase 10 (GalNAc-T10)	2717	72.84	12.23	1331	44.9	7.53	2325	50.44	8.47		0.615699	0.692559
NXPH4_HUMAN,	O95158,	12355	NM_007224	chr12	+	57610577	57620232	57610752	57619530	2	57610577,57618660,	57610809,57620232,	1804	NXPH4	neurexophilin 4	776	20.8	11.52	382	12.88	7.13	498	10.8	5.98		0.618924	0.519097
ZN785_HUMAN,	A8K8V0,	8269	NM_152458	chr16	-	30591993	30597092	30593880	30596932	3	30591993,30596442,30596727,	30594764,30596571,30597092,	3265	ZNF785	zinc finger protein 785	275	7.37	2.25	136	4.58	1.4	240	5.2	1.59		0.622222	0.706667
E41L5_HUMAN,	Q9HCM4,	17444	NM_001184937,NM_001184938,NM_001184939,NM_020909	chr2	+	120770603	120936697	120776660	120932483	26	120770603,120776652,120799581,120830753,120831675,120833051,120833276,120834546,120834804,120836068,120844746,120847922,120849130,120850824,120857819,120858274,120861635,120885263,120889193,120900578,120903800,120918456,120922411,120925041,120925452,120932416,	120771257,120776840,120799686,120830796,120831754,120833096,120833329,120834667,120834892,120836157,120844816,120848092,120849237,120850852,120857862,120858390,120864492,120885427,120889291,120900707,120903865,120918550,120922486,120925083,120925583,120936697,	9935	EPB41L5	erythrocyte membrane protein band 4.1 like 5	494	13.24	1.33	247	8.33	0.83	284	6.16	0.62		0.62406	0.466165
FZD1_HUMAN,	Q9UP38,	14257	NM_003505	chr7	+	90893782	90898132	90894195	90896139	1	90893782,	90898132,	4350	FZD1	frizzled family receptor 1	292	7.82	1.79	145	4.89	1.12	209	4.53	1.04		0.625698	0.581006
E41LA_HUMAN,	Q9HCS5,	16116	NM_022140	chr5	-	111498314	111755010	111500686	111754736	23	111498314,111504435,111504691,111505997,111506641,111519712,111530264,111531357,111540071,111541117,111545588,111570330,111575356,111576415,111594925,111595587,111598190,111600592,111601929,111611022,111615968,111643082,111754637,	111500815,111504517,111504802,111506066,111506689,111519832,111530342,111531405,111540185,111541201,111545679,111570452,111575434,111576507,111594989,111595676,111598278,111600713,111602027,111611101,111616020,111643187,111755010,	4707	EPB41L4A	erythrocyte membrane protein band 4.1 like 4A	738	19.78	4.2	368	12.41	2.63	547	11.86	2.51		0.62619	0.597619
P2Y11_HUMAN,	Q96G91,	8328	NM_002566	chr19	+	10222196	10226064	10222397	10225414	2	10222196,10224308,	10222416,10226064,	1976	P2RY11	purinergic receptor P2Y, G-protein coupled, 11	376	10.08	5.1	188	6.34	3.2	249	5.4	2.73		0.627451	0.535294
ACPM_HUMAN,	O14561,	18059	NM_005003	chr16	-	23592334	23607639	23593604	23607611	5	23592334,23593596,23596656,23598517,23607443,	23592494,23593696,23596744,23598640,23607639,	667	NDUFAB1	NADH dehydrogenase (ubiquinone) 1, alpha/beta subcomplex, 1, 8kDa	1852	49.65	74.43	940	31.71	47.54	1666	36.14	54.18		0.638721	0.727932
ZN736_HUMAN,	B4DX44,	15438	NM_001170905	chr7	+	63773185	63810017	63774528	63809525	5	63773185,63774250,63796636,63797264,63808467,	63773229,63774531,63796763,63797360,63810017,	2098	ZNF736	zinc finger protein 736	124	3.32	1.58	63	2.12	1.01	97	2.1	1		0.639241	0.632911
BNIP3_HUMAN,	Q12983,	11477	NM_004052	chr10	-	133781203	133795435	133782027	133795310	6	133781203,133784141,133784367,133786537,133787296,133795264,	133782073,133784291,133784474,133786622,133787447,133795435,	1534	BNIP3	BCL2/adenovirus E1B 19kDa interacting protein 3	753	20.18	13.15	384	12.95	8.44	666	14.45	9.41		0.641825	0.715589
MYL9_HUMAN,	P24844,	16080	NM_006097,NM_181526	chr20	+	35169886	35178226	35173287	35177652	4	35169886,35173261,35176434,35177479,	35169964,35173471,35176596,35178226,	1197	MYL9	myosin, light chain 9, regulatory	531	14.23	11.88	274	9.24	7.71	163	3.53	2.94		0.64899	0.247475
REEP6_HUMAN,	Q96HR9,	2676	NM_138393	chr19	+	1491164	1497924	1491268	1497210	5	1491164,1495292,1495467,1496283,1497172,	1491383,1495386,1495606,1496452,1497924,	1373	REEP6	receptor accessory protein 6	164	4.39	3.19	85	2.86	2.08	149	3.23	2.35		0.652038	0.736677
		22421	NR_024348	chr16	-	30930639	30934590	30934590	30934590	1	30930639,	30934590,	3951	FBXL19-AS1	FBXL19 antisense RNA 1 (non-protein coding)	415	11.12	2.81	216	7.28	1.84	277	6.01	1.52		0.654804	0.540925
PLAC8_HUMAN,	Q9NZF1,	16501	NM_001130715,NM_001130716,NM_016619	chr4	-	84011210	84035911	84015839	84029074	6	84011210,84015306,84026048,84028956,84030880,84035818,	84012124,84015944,84026173,84029103,84031012,84035911,	2049	PLAC8	placenta-specific 8	766	20.53	10.01	399	13.45	6.56	707	15.34	7.48		0.655345	0.747253
SCPDL_HUMAN,	Q8NBX0,	9227	NM_016002	chr1	+	246887377	246931440	246887724	246930602	12	246887377,246890193,246899276,246903473,246907377,246921527,246922335,246923258,246923472,246927547,246929359,246930496,	246887914,246890306,246899357,246903603,246907427,246921658,246922453,246923378,246923529,246927659,246929441,246931440,	2475	SCCPDH	saccharopine dehydrogenase (putative)	2554	68.47	27.66	1331	44.9	18.14	2099	45.54	18.39		0.655821	0.664859
PLAG1_HUMAN,	Q6DJT9,	4865	NM_001114634,NM_001114635,NM_002655	chr8	-	57073467	57123859	57078801	57080828	5	57073467,57080586,57083649,57091967,57123679,	57080062,57080945,57083748,57092072,57123859,	7338	PLAG1	pleiomorphic adenoma gene 1	376	10.08	1.37	197	6.64	0.9	198	4.29	0.58		0.656934	0.423358
BDNF_HUMAN,	P23560,	13639	NM_001143805,NM_001143806,NM_001143807,NM_001143808,NM_001143809,NM_001143810,NM_001143811,NM_001143812,NM_001143813,NM_001143814,NM_001143816,NM_001709,NM_170731,NM_170732,NM_170733,NM_170734,NM_170735	chr11	-	27676441	27743605	27679367	27742961	11	27676441,27681702,27695606,27720928,27721710,27722222,27722517,27722843,27741057,27741892,27742958,	27681196,27681819,27695889,27721214,27722035,27722447,27722600,27723180,27741294,27742326,27743605,	7729	BDNF	brain-derived neurotrophic factor	818	21.93	2.83	427	14.4	1.86	621	13.47	1.74		0.657244	0.614841
MOT2_HUMAN,	O60669,	4617	NM_004731	chr12	+	60083125	60175408	60098582	60173460	5	60083125,60098552,60164999,60168437,60173203,	60083251,60098799,60165143,60169256,60175408,	3541	SLC16A7	solute carrier family 16, member 7 (monocarboxylic acid transporter 2)	378	10.13	2.86	198	6.67	1.88	188	4.07	1.14		0.657343	0.398601
SC6A6_HUMAN,	P31641,	7000	NM_001134367,NM_001134368,NM_003043	chr3	+	14444105	14530857	14485142	14526515	15	14444105,14457919,14485131,14487224,14489089,14499457,14508023,14509360,14509595,14513712,14518712,14519973,14520592,14523178,14526374,	14444355,14457961,14485371,14487359,14489693,14499590,14508158,14509464,14509720,14513825,14518850,14520076,14520693,14523349,14530857,	6877	SLC6A6	solute carrier family 6 (neurotransmitter transporter, taurine), member 6	8354	223.98	32.56	4368	147.35	21.42	7582	164.51	23.92		0.657862	0.734644
SAT1_HUMAN,	P21673,	5992	NM_002970	chrX	+	23801274	23804327	23801468	23803973	6	23801274,23801774,23801916,23803444,23803636,23803802,	23801534,23801826,23802000,23803546,23803677,23804327,	1064	SAT1	spermidine/spermine N1-acetyltransferase 1	1174	31.47	29.57	615	20.74	19.49	986	21.39	20.1		0.659114	0.679743
THUM1_HUMAN,	Q9NXG2,	7202	NM_017736	chr16	-	20744988	20753199	20748201	20753061	4	20744988,20749029,20750218,20752830,	20748608,20749278,20750393,20753199,	4413	THUMPD1	THUMP domain containing 1	2415	64.74	14.67	1274	42.97	9.73	2142	46.47	10.53		0.663258	0.717791
ZN484_HUMAN,	Q5JVG2,	10210	NM_001007101,NM_031486	chr9	-	95608350	95640290	95608509	95637311	5	95608350,95618092,95618473,95637296,95640171,	95610833,95618185,95618600,95637341,95640290,	2867	ZNF484	zinc finger protein 484	303	8.12	2.83	160	5.39	1.88	245	5.31	1.85		0.664311	0.65371
IFT27_HUMAN,	Q9BW83,	6014	NM_001177701,NM_001177702,NM_006860	chr22	-	37154245	37172177	37154354	37171751	8	37154245,37158947,37159962,37162181,37163349,37163826,37164026,37171717,	37154453,37159057,37160080,37162241,37163409,37163906,37164074,37172177,	1144	IFT27	intraflagellar transport 27 homolog (Chlamydomonas)	147	3.94	3.44	78	2.63	2.29	129	2.79	2.43		0.665698	0.706395
RM50_HUMAN,	Q8N5N7,	4971	NM_019051	chr9	-	104152248	104160919	104152747	104160874	2	104152248,104160782,	104153132,104160919,	1021	MRPL50	mitochondrial ribosomal protein L50	1221	32.73	32.05	648	21.85	21.4	1047	22.71	22.24		0.667707	0.693916
GNAI1_HUMAN,	P63096,	11010	NM_001256414,NM_002069	chr7	+	79764139	79848725	79764476	79846809	9	79764139,79765070,79818266,79818405,79828540,79833019,79840284,79842031,79846618,	79764594,79765388,79818309,79818547,79828698,79833148,79840414,79842185,79848725,	3636	GNAI1	guanine nucleotide binding protein (G protein), alpha inhibiting activity polypeptide 1	2623	70.32	19.33	1392	46.95	12.91	1938	42.05	11.56		0.667874	0.598034
NOMO2_HUMAN,	Q5JPE7,	3668	NM_001004060,NM_173614	chr16	-	18511181	18573434	18511227	18573362	31	18511181,18512248,18518130,18520486,18522866,18524671,18525663,18527204,18528510,18530550,18530822,18531918,18532086,18535165,18535810,18538858,18540822,18542358,18542787,18544326,18549847,18550180,18553493,18553915,18554938,18558549,18560842,18562760,18566128,18569023,18573197,	18511825,18512341,18518250,18520588,18522977,18524755,18525805,18527332,18528624,18530677,18530982,18532001,18532305,18535261,18535874,18538946,18540959,18542490,18542929,18544501,18549998,18550286,18553583,18554053,18555091,18558622,18560949,18562861,18566174,18569113,18573434,	4253	NOMO2	NODAL modulator 2	140	3.75	0.88	75	2.53	0.59	116	2.51	0.59		0.670455	0.670455
ZN273_HUMAN,	Q14593,	13362	NM_021148	chr7	+	64363619	64391955	64363695	64389416	4	64363619,64377958,64378574,64388031,	64363797,64378085,64378670,64391955,	4325	ZNF273	zinc finger protein 273	118	3.16	0.73	64	2.15	0.49	82	1.77	0.4		0.671233	0.547945
		56331	AK127460	chr17	+	76492734	76499138	76492734	76499138	6	76492734,76492749,76494925,76495463,76495499,76495821,	76492748,76493118,76495463,76495499,76495821,76499138,	4596	LOC100507386	uncharacterized LOC100507386	274	7.34	1.59	146	4.92	1.07	254	5.51	1.19		0.672956	0.748428
SH2B1_HUMAN,	Q9NRF2,	11016	NM_001145795,NM_001145796,NM_001145797,NM_001145812,NM_015503	chr16	+	28875077	28885534	28877415	28885141	10	28875077,28875295,28878651,28880326,28880528,28883100,28883510,28883854,28884490,28884767,	28875266,28878354,28878753,28880418,28880704,28883304,28883722,28884079,28884590,28885534,	5126	SH2B1	SH2B adaptor protein 1	1212	32.49	6.33	651	21.96	4.28	980	21.26	4.14		0.676145	0.654028
ZN169_HUMAN,	Q14929,	1857	NM_194320	chr9	+	97021577	97065291	97041094	97063652	5	97021577,97041039,97054622,97055255,97062096,	97021627,97041127,97054749,97055351,97065291,	3556	ZNF169	zinc finger protein 169	161	4.31	1.21	87	2.93	0.82	114	2.47	0.69		0.677686	0.570248
CSC10_HUMAN,	Q5T4H9,	820	NM_001010911	chr10	-	21783420	21786213	21784528	21785743	2	21783420,21785678,	21784874,21786213,	1989	C10orf114	chromosome 10 open reading frame 114	245	6.56	3.29	132	4.45	2.23	216	4.68	2.35		0.677812	0.714286
		22338	NR_024035	chr5	-	178191863	178203277	178203277	178203277	7	178191863,178194130,178195470,178199429,178201498,178202267,178203142,	178193176,178194336,178195665,178199632,178201549,178202337,178203277,	2173	AACSP1	acetoacetyl-CoA synthetase pseudogene 1	115	3.08	1.41	62	2.09	0.96	93	2.01	0.92		0.680851	0.652482
CJ088_HUMAN,	Q9H8K7,	12808	NM_024942	chr10	-	124690418	124713919	124691942	124713694	6	124690418,124697220,124708164,124711469,124712344,124713530,	124692177,124697675,124708371,124711542,124712548,124713919,	3087	C10orf88	chromosome 10 open reading frame 88	223	5.97	1.93	121	4.08	1.32	181	3.92	1.26		0.683938	0.65285
EVI1_HUMAN,MDS1_HUMAN,	Q03112,Q13465,	15078	NM_001105077,NM_001105078,NM_001163999,NM_001164000,NM_001205194,NM_004991,NM_005241	chr3	-	168801286	169381563	168802696	169381160	21	168801286,168806787,168807787,168810745,168812863,168818672,168819847,168825713,168830574,168833170,168838843,168840367,168845631,168849216,168861485,168862784,168864013,168864264,168864510,169098974,169381123,	168802831,168806971,168808024,168810890,168813033,168818750,168820014,168825740,168830662,168834527,168839000,168840515,168845848,168849319,168861620,168862846,168864093,168864400,168865522,169099312,169381563,	6826	MECOM	MDS1 and EVI1 complex locus	2132	57.16	8.37	1163	39.23	5.74	1875	40.68	5.95		0.685783	0.710872
RND3_HUMAN,	P61587,	8870	NM_001254738,NM_005168	chr2	-	151324706	151344209	151326500	151343931	5	151324706,151328140,151331388,151343207,151343781,	151326752,151328275,151331498,151343295,151344209,	2807	RND3	Rho family GTPase 3	972	26.06	9.28	532	17.94	6.39	856	18.57	6.61		0.688578	0.712284
AR6P1_HUMAN,	Q15041,	15514	NM_015161	chr16	-	18802990	18812857	18804573	18812788	6	18802990,18805920,18806785,18809246,18810022,18812752,	18804692,18806005,18806903,18809366,18810156,18812857,	2264	ARL6IP1	ADP-ribosylation factor-like 6 interacting protein 1	6598	176.9	78.13	3620	122.11	53.93	5904	128.1	56.58		0.69026	0.724178
ENOB_HUMAN,	P13929,	18730	NM_001193503,NM_001976,NM_053013	chr17	+	4854383	4860426	4855124	4860342	12	4854383,4855122,4856089,4856345,4856566,4857006,4858369,4858701,4859236,4859867,4860125,4860272,	4854519,4855209,4856185,4856404,4856636,4857140,4858592,4858899,4859438,4859976,4860184,4860426,	1527	ENO3	enolase 3 (beta, muscle)	4220	113.14	74.09	2321	78.29	51.27	2983	64.72	42.38		0.691996	0.572007
PLRKT_HUMAN,	Q9HBL7,	7953	NM_018465	chr9	-	5357966	5437937	5358238	5431977	6	5357966,5361077,5361757,5431896,5436568,5437788,	5358360,5361187,5361888,5431983,5436694,5437937,	997	C9orf46	chromosome 9 open reading frame 46	113	3.02	3.02	62	2.09	2.09	104	2.25	2.25		0.692053	0.745033
		56961	BC040288	chr11	-	124659137	124662714	124659137	124662714	1	124659137,	124662714,	3577	LOC100130428	IGYY565	341	9.14	2.55	189	6.37	1.78	299	6.48	1.81		0.698039	0.709804
SLIK5_HUMAN,	O94991,	3757	NM_015567	chr13	+	88324869	88331870	88327643	88330520	2	88324869,88327635,	88325080,88331870,	4446	SLITRK5	SLIT and NTRK-like family, member 5	177	4.74	1.06	99	3.33	0.74	72	1.56	0.35		0.698113	0.330189
SPOPL_HUMAN,	Q6IQ16,	6383	NM_001001664	chr2	+	139259349	139330805	139307786	139326650	11	139259349,139307726,139308052,139308472,139310123,139316591,139316851,139318374,139322277,139322509,139326505,	139259689,139307864,139308174,139308624,139310251,139316769,139316907,139318497,139322420,139322563,139330805,	5734	SPOPL	speckle-type POZ protein-like	1059	28.39	4.95	589	19.86	3.46	858	18.61	3.24		0.69899	0.654545
ZN680_HUMAN,	Q8NEM1,	14047	NM_001130022,NM_178558	chr7	-	63980254	64023505	63981538	64023332	5	63980254,63985033,64004084,64004683,64023302,	63982878,63986895,64004180,64004810,64023505,	4912	ZNF680	zinc finger protein 680	612	16.4	3.33	341	11.5	2.34	371	8.04	1.63		0.702703	0.489489
TM156_HUMAN,	Q8N614,	16798	NM_024943	chr4	-	38968440	39034041	38972689	39033933	7	38968440,38972651,38987955,38990470,38995357,39000259,39033845,	38969262,38972757,38988039,38990590,38995618,39000529,39034041,	1859	TMEM156	transmembrane protein 156	129	3.45	1.85	72	2.42	1.3	104	2.25	1.21		0.702703	0.654054
NUA4L_HUMAN,	Q9NRX3,	1381	NM_020142	chr12	-	57628685	57634475	57629345	57630868	5	57628685,57629531,57630375,57630811,57634461,	57629402,57629592,57630464,57631118,57634475,	1188	NDUFA4L2	NADH dehydrogenase (ubiquinone) 1 alpha subcomplex, 4-like 2	166	4.45	3.74	93	3.13	2.63	80	1.73	1.45		0.703209	0.387701
PPM1K_HUMAN,	Q8N3J5,	18	NM_152542	chr4	-	89181531	89205888	89183746	89199735	7	89181531,89186152,89189341,89189892,89198294,89199295,89205557,	89183878,89186287,89189486,89190058,89198395,89199794,89205888,	3724	PPM1K	protein phosphatase, Mg2+/Mn2+ dependent, 1K	603	16.16	4.33	337	11.36	3.05	553	11.99	3.21		0.704388	0.741339
ZN138_HUMAN,	P52744,	17935	NM_001160183,NM_006524	chr7	+	64254770	64294025	64254946	64292580	5	64254770,64275295,64275953,64291317,64291828,	64254949,64275422,64276031,64291454,64294025,	2718	ZNF138	zinc finger protein 138	427	11.44	4.2	241	8.12	2.98	370	8.02	2.95		0.709524	0.702381
FRRS1_HUMAN,	Q6ZNA5,	7249	NM_001013660	chr1	-	100174258	100231349	100174453	100214324	17	100174258,100174753,100176389,100177660,100177973,100181141,100182965,100185089,100194048,100195205,100203641,100206348,100207734,100212849,100214128,100214452,100230852,	100174676,100174815,100176505,100177719,100178071,100181228,100183081,100185203,100194196,100195304,100203824,100206496,100207829,100212986,100214324,100214557,100231349,	2678	FRRS1	ferric-chelate reductase 1	316	8.47	3.16	179	6.03	2.25	220	4.77	1.78		0.712025	0.563291
		19212	ENST00000352103,ENST00000416602,ENST00000418651,ENST00000437742,ENST00000472361,ENST00000473286,ENST00000495164	chr7	+	66767607	66786513	66770983	66785098	5	66767607,66770973,66773383,66774550,66785089,	66767872,66771070,66774126,66774705,66786513,	2684	STAG3L4	stromal antigen 3-like 4	196	5.25	1.95	111	3.74	1.39	177	3.84	1.43		0.712821	0.733333
ELL3_HUMAN,	Q9HB65,	17221	NM_025165	chr15	-	44064797	44069502	44065313	44069099	11	44064797,44065501,44066379,44066673,44066793,44067503,44067722,44067919,44068236,44068706,44068967,	44065424,44065546,44066551,44066716,44066971,44067579,44067808,44068121,44068349,44068742,44069502,	2113	ELL3	elongation factor RNA polymerase II-like 3	116	3.11	1.47	66	2.22	1.05	102	2.21	1.04		0.714286	0.707483
		23276	NR_024031	chr4	+	53578620	53580305	53580305	53580305	3	53578620,53578990,53579660,	53578694,53579126,53580305,	855	DANCR	differentiation antagonizing non-protein coding RNA	2432	65.2	76.25	1384	46.68	54.59	1867	40.5	47.36		0.715934	0.621115
PDE3A_HUMAN,	Q14432,	2126	NM_000921,NM_001244683	chr12	+	20522178	20837041	20522218	20833205	17	20522178,20709593,20724797,20766376,20769163,20774229,20782841,20786626,20787835,20790033,20792779,20799423,20799684,20801621,20803378,20806880,20832963,	20523178,20709644,20725105,20766634,20769318,20774345,20783061,20786712,20787990,20790171,20792891,20799537,20799884,20801825,20803534,20807139,20837041,	7610	PDE3A	phosphodiesterase 3A, cGMP-inhibited	14220	381.26	50.09	8097	273.14	35.89	8854	192.11	25.24		0.71651	0.503893
RS15A_HUMAN,	P62244,	5619	NM_001019,NM_001030009	chr16	-	18794276	18801656	18794330	18800435	5	18794276,18796059,18799384,18800302,18801565,	18794424,18796145,18799464,18800440,18801656,	543	RPS15A	ribosomal protein S15a	2356	63.16	116.31	1342	45.27	83.37	2105	45.67	84.1		0.716791	0.723068
NEK7_HUMAN,	Q8TDX7,	6912	NM_133494	chr1	+	198126107	198291548	198201710	198288652	10	198126107,198201682,198222169,198231704,198233254,198247090,198248083,198262074,198266256,198288541,	198126406,198201767,198222310,198231767,198233365,198247199,198248191,198262169,198266370,198291548,	4132	NEK7	NIMA (never in mitosis gene a)-related kinase 7	1786	47.88	11.58	1020	34.4	8.32	1401	30.39	7.35		0.71848	0.634715
FANCC_HUMAN,	Q00597,	3920	NM_000136,NM_001243743,NM_001243744	chr9	-	97861335	98079991	97863988	98011573	17	97861335,97869347,97872507,97873744,97876910,97879596,97887367,97888810,97897627,97912204,97933360,97934318,98002930,98009713,98011408,98079410,98079807,	97864132,97869551,97873627,97873919,97876992,97879672,97887467,97888863,97897784,97912369,97933425,97934429,98003025,98009798,98011651,98079536,98079991,	5838	FANCC	Fanconi anemia, complementation group C	1659	44.48	7.61	947	31.94	5.47	1453	31.52	5.39		0.718791	0.708279
		24923	NR_024430	chr11	-	121959810	122073770	122073770	122073770	4	121959810,122026258,122051043,122073471,	121962448,122026340,122051106,122073770,	3082	MIR100HG	mir-100-let-7a-2 cluster host gene (non-protein coding)	492	13.19	4.27	281	9.47	3.07	397	8.61	2.79		0.71897	0.653396
ERP44_HUMAN,	Q9BS26,	17253	NM_015051	chr9	-	102741462	102861330	102744893	102861122	12	102741462,102747248,102768787,102769859,102778603,102780537,102782897,102784323,102814698,102820101,102822381,102861065,	102744995,102747351,102768929,102769971,102778720,102780595,102783013,102784508,102814814,102820141,102822454,102861330,	4860	ERP44	endoplasmic reticulum protein 44	2345	62.87	12.93	1344	45.33	9.32	2046	44.39	9.13		0.720804	0.70611
CS052_HUMAN,	Q9BSF4,	16399	NM_138358	chr19	+	11039423	11040916	11039498	11040378	2	11039423,11039689,	11039592,11040916,	1396	C19orf52	chromosome 19 open reading frame 52	257	6.89	4.93	148	4.99	3.57	230	4.99	3.57		0.724138	0.724138
ER6L2_HUMAN,	Q5T890,	9738	NM_001010895	chr9	+	98637899	98731122	98638287	98729002	14	98637899,98643150,98660130,98669359,98677949,98678508,98683456,98684586,98685541,98690360,98691000,98703735,98718195,98728843,	98638366,98643575,98660253,98669553,98678111,98678716,98683597,98684700,98685661,98690432,98691146,98703831,98718295,98731122,	4647	C9orf102	chromosome 9 open reading frame 102	467	12.52	2.69	270	9.1	1.95	379	8.22	1.76		0.724907	0.654275
FBXW9_HUMAN,	Q5XUX1,	12813	NM_032301	chr19	-	12799729	12807455	12800029	12807395	10	12799729,12800185,12800354,12800574,12800775,12801979,12802155,12805407,12805612,12806986,	12800104,12800251,12800444,12800688,12800924,12802071,12802268,12805536,12805752,12807455,	1737	FBXW9	F-box and WD repeat domain containing 9	364	9.75	5.61	210	7.08	4.07	325	7.05	4.05		0.72549	0.721925
NID2_HUMAN,	Q14112,	12531	NM_007361	chr14	-	52471519	52535946	52472203	52535712	22	52471519,52472454,52473254,52474527,52477593,52478271,52481004,52481771,52485778,52486776,52493918,52495439,52496264,52505464,52507368,52508822,52509499,52520296,52520737,52526841,52534575,52535484,	52472214,52472567,52473378,52474685,52477765,52478401,52481174,52481993,52486012,52486896,52494062,52495568,52496408,52505695,52507569,52509068,52509649,52520656,52521039,52527074,52534881,52535946,	5046	NID2	nidogen 2 (osteonidogen)	1002	26.86	5.32	581	19.59	3.88	704	15.27	3.02		0.729323	0.567669
SH321_HUMAN,	A4FU49,	2390	NM_001162530,NM_024676	chr1	+	36771993	36786948	36772021	36786728	16	36771993,36772198,36772442,36772707,36773117,36773370,36773518,36773709,36773989,36775148,36784671,36784860,36785042,36785275,36786515,36786656,	36772025,36772356,36772506,36772886,36773208,36773426,36773564,36773810,36774076,36775191,36784765,36784913,36785137,36786399,36786579,36786948,	2579	SH3D21	SH3 domain containing 21	151	4.04	1.56	88	2.96	1.14	86	1.86	0.72		0.730769	0.461538
TUT7_HUMAN,	Q5VYS8,	11056	NM_001185059,NM_001185074,NM_024617	chr9	-	88902647	88969402	88903591	88968114	27	88902647,88916190,88918000,88919770,88920106,88923343,88924126,88924377,88924842,88925620,88932133,88933872,88934498,88937239,88937787,88940248,88943254,88952333,88953737,88954950,88955916,88957989,88959891,88960583,88961213,88967594,88969185,	88903659,88916516,88918116,88919862,88920154,88923521,88924204,88924491,88924932,88925724,88932191,88933973,88934585,88937390,88938875,88940429,88943407,88952453,88953864,88955020,88955968,88958078,88960069,88960700,88961395,88968145,88969402,	5680	ZCCHC6	zinc finger, CCHC domain containing 6	1920	51.47	9.06	1120	37.78	6.65	1681	36.47	6.42		0.733996	0.708609
CA198_HUMAN,	Q9H425,	9762	NM_001136494,NM_001136495,NM_032800	chr1	-	230972864	231005335	230975597	231004258	7	230972864,230979099,230991413,230991623,231003925,231004557,231005227,	230975654,230979642,230991464,230991782,231004302,231004661,231005335,	4132	C1orf198	chromosome 1 open reading frame 198	4265	114.35	27.67	2492	84.06	20.34	3246	70.43	17.04		0.735092	0.615829
GCP6_HUMAN,	Q96RT7,	14289	NM_020461	chr22	-	50656117	50683400	50656164	50682888	25	50656117,50656346,50656617,50656916,50657131,50657496,50657716,50658072,50658385,50658679,50660456,50660882,50662569,50662760,50662939,50664222,50664478,50664715,50665161,50665427,50666335,50667832,50671744,50678632,50682147,	50656256,50656546,50656831,50657049,50657326,50657638,50657885,50658220,50658444,50660303,50660531,50661021,50662685,50662849,50663021,50664372,50664618,50664807,50665271,50665506,50666457,50668006,50671955,50678796,50683400,	6019	TUBGCP6	tubulin, gamma complex associated protein 6	1013	27.16	4.51	593	20	3.32	849	18.42	3.06		0.736142	0.678492
AK1C3_HUMAN,	P42330,	1174	NM_001253908,NM_001253909,NM_003739	chr10	+	5090957	5149878	5091003	5149695	10	5090957,5136567,5138601,5139625,5140993,5141518,5144292,5144676,5147786,5149652,	5091087,5136720,5138769,5140368,5141071,5141641,5144402,5144842,5147869,5149878,	1980	AKR1C3	aldo-keto reductase family 1, member C3 (3-alpha hydroxysteroid dehydrogenase, type II)	5865	157.24	79.41	3447	116.28	58.72	1866	40.48	20.44		0.739453	0.257398
SMG1_HUMAN,	Q96Q15,	18213	NM_015092	chr16	-	18816174	18937726	18820890	18937363	63	18816174,18823082,18823269,18826496,18826761,18827623,18828612,18830823,18839352,18840607,18841247,18841540,18844261,18845525,18846213,18847254,18847681,18848574,18849335,18849678,18849872,18851019,18852886,18853529,18856750,18858774,18859137,18860538,18861270,18861558,18863388,18863639,18864904,18865977,18869491,18870343,18870877,18871988,18874971,18875323,18877942,18879511,18879844,18880425,188…	18820968,18823189,18823449,18826603,18826973,18827851,18828792,18830976,18839490,18841077,18841437,18841691,18844488,18845760,18846486,18847534,18847854,18848765,18849554,18849788,18850011,18851268,18853116,18853776,18856973,18858929,18859355,18860700,18861448,18861789,18863527,18863784,18865189,18866226,18869612,18870503,18871025,18872098,18875173,18875466,18878097,18879676,18880041,18880625,188…	16065	SMG1	smg-1 homolog, phosphatidylinositol 3-kinase-related kinase (C. elegans)	8166	218.94	13.62	4809	162.22	10.09	7280	157.95	9.83		0.740822	0.721733
2ABB_HUMAN,	Q00005,	14172	NM_001127381,NM_004576,NM_181674,NM_181675,NM_181676,NM_181677,NM_181678	chr5	-	145969067	146461033	145969509	146435306	14	145969067,145972533,145979853,146017813,146030109,146070690,146077541,146080607,146236061,146257564,146414731,146435227,146460621,146460884,	145969789,145972625,145980023,146017978,146030287,146070803,146077707,146080705,146236146,146258457,146414803,146435700,146460699,146461033,	3454	PPP2R2B	protein phosphatase 2, regulatory subunit B, beta	534	14.31	4.14	315	10.62	3.07	228	4.94	1.43		0.741546	0.345411
GSTA4_HUMAN,	O15217,	8969	NM_001512	chr6	-	52842745	52860178	52843267	52859041	7	52842745,52847371,52849261,52850248,52852154,52858954,52860046,	52843390,52847503,52849403,52850381,52852206,52859059,52860178,	1341	GSTA4	glutathione S-transferase alpha 4	587	15.73	11.73	346	11.67	8.7	512	11.1	8.27		0.741688	0.70503
UBFD1_HUMAN,	O14562,	14683	NM_019116	chr16	+	23568861	23585710	23569063	23581911	7	23568861,23569270,23570788,23573526,23573945,23578307,23581800,	23569088,23569600,23570997,23573592,23574051,23578390,23585710,	4931	UBFD1	ubiquitin family domain containing 1	3391	90.91	18.43	2001	67.5	13.68	2931	63.59	12.89		0.742268	0.699403
ADML_HUMAN,	P35318,	11813	NM_001124	chr11	+	10326641	10328923	10327247	10328188	4	10326641,10327226,10327495,10327878,	10326776,10327345,10327645,10328923,	1449	ADM	adrenomedullin	688	18.44	12.72	407	13.72	9.46	528	11.45	7.9		0.743711	0.621069
		23062	NR_027036	chr22	-	46435786	46440748	46440748	46440748	4	46435786,46438453,46439442,46440488,	46436932,46438520,46439579,46440748,	1610	LOC100271722	uncharacterized LOC100271722	127	3.4	2.11	75	2.53	1.57	104	2.25	1.39		0.744076	0.658768
MZT2A_HUMAN,	Q6P582,	18224	NM_001085365	chr2	-	132241532	132250064	132241633	132249949	3	132241532,132249448,132249779,	132241791,132249597,132250064,	693	MZT2A	mitotic spindle organizing protein 2A	830	22.25	32.1	493	16.63	23.99	746	16.18	23.34		0.747352	0.727103
BET1_HUMAN,	O15155,	10893	NM_005868	chr7	-	93620999	93633690	93623541	93633528	4	93620999,93625576,93628481,93633509,	93623697,93625633,93628606,93633690,	3061	BET1	blocked early in transport 1 homolog (S. cerevisiae)	891	23.88	7.8	530	17.87	5.83	785	17.03	5.56		0.747436	0.712821
CIR1_HUMAN,	Q86X95,	3965	NM_004882	chr2	-	175212877	175260443	175213224	175260350	10	175212877,175215387,175216346,175243650,175244929,175245378,175245531,175246431,175252412,175260278,	175213900,175215473,175216453,175243768,175244978,175245443,175245542,175246505,175252507,175260443,	1793	CIR1	corepressor interacting with RBPJ, 1	303	8.12	4.52	180	6.07	3.38	251	5.44	3.03		0.747788	0.670354
		24508	NR_003111	chr3	-	129101676	129118282	129118282	129118282	4	129101676,129112477,129115882,129117850,	129103061,129112638,129115979,129118282,	2075	RPL32P3	ribosomal protein L32 pseudogene 3	228	6.11	2.94	136	4.58	2.2	208	4.51	2.17		0.748299	0.738095
COQ7_HUMAN,	Q99807,	328	NM_001190983,NM_016138	chr16	+	19078916	19091417	19078986	19089480	7	19078916,19079238,19083249,19085242,19087042,19088627,19089402,	19079059,19079330,19083428,19085357,19087182,19088696,19091417,	2753	COQ7	coenzyme Q7 homolog, ubiquinone (yeast)	821	22.01	7.99	489	16.49	5.98	751	16.29	5.91		0.748436	0.739675
FOPNL_HUMAN,	Q96NB1,	4616	NM_144600	chr16	-	15959576	15982447	15961296	15982442	5	15959576,15967347,15973660,15977864,15982414,	15961373,15967484,15973745,15978062,15982447,	2250	FOPNL	FGFR1OP N-terminal like	1611	43.19	19.19	959	32.35	14.37	1484	32.19	14.3		0.748828	0.74518
ZCCHL_HUMAN,	Q96H79,	8434	NM_080660	chr7	-	138710451	138720775	138711289	138720763	5	138710451,138711453,138713447,138719288,138720398,	138711306,138711579,138713706,138719424,138720775,	1753	ZC3HAV1L	zinc finger CCCH-type, antiviral 1-like	438	11.74	6.69	261	8.8	5.01	391	8.48	4.83		0.748879	0.721973

## Sheet: RPE1 FC > 1.5
Upregulated genes under nonstressed conditions in the Hikeshi-KO hTERT-RPE1 cells, compared with WT cells (fold change > 1.5)
hg19														1_hTERT_RPE1_non_HS 181022_Hiseq2B_l6_025_Dr_Imamoto			2_Hikeshi-KO#3_non_HS 181022_Hiseq2B_l6_026_Dr_Imamoto			3_Hikeshi-KO#4_non_HS 181022_Hiseq2B_l6_027_Dr_Imamoto 181106_Hiseq2A_l8_027_Dr_Imamoto				non-HS Hikeshi-KO#3/WT	non-HS Hikeshi-KO#4/WT
inhouse ID	Acc#	chomosome	strand	utr start	utr end	cds start	cds end	exon num	exon starts	exon ends	mRNA length	symbol	definition	tag	ppm	rpkm	tag	ppm	rpkm	tag	ppm	rpkm		rpkm ratio	rpkm ratio
12909	NM_015225	chr9	-	79226291	79521003	79229485	79520879	19	79226291,79234255,79239367,79244107,79251386,79252333,79253101,79259654,79267398,79270338,79318252,79319676,79328478,79438547,79441495,79461430,79465378,79469019,79520843,	79229516,79234303,79239406,79244206,79251473,79252465,79253204,79259825,79267599,79270418,79319015,79326274,79328637,79438642,79441648,79461594,79465581,79469124,79521003,	12585	PRUNE2	prune homolog 2 (Drosophila)	108	3.13	0.24	1497	52.38	4.16	1354	57.71	4.58		17.3333	19.0833
11331	NM_175063,NM_206538	chr19	+	50979735	50986608	50979801	50985516	8	50979735,50981185,50982213,50983367,50983837,50984140,50985117,50985405,	50979915,50981258,50982323,50983472,50984019,50984234,50985204,50986608,	2034	C19orf63	chromosome 19 open reading frame 63	165	4.79	2.35	1172	41.01	20.16	1259	53.66	26.38		8.57872	11.2255
11251	NM_005635	chrX	+	48114796	48126879	48116676	48125822	8	48114796,48116656,48117180,48117970,48121200,48123216,48125721,48126288,	48114867,48116745,48117295,48118066,48121250,48123352,48125826,48126879,	1253	SSX1	synovial sarcoma, X breakpoint 1	143	4.15	3.31	927	32.44	25.88	591	25.19	20.1		7.81873	6.07251
11731	NM_001105206,NM_001105207,NM_001105208,NM_001105209,NM_002290	chr6	-	112429133	112575828	112430639	112575352	39	112429133,112435278,112435865,112437065,112438941,112440358,112441485,112443216,112450123,112451077,112452169,112453954,112454550,112455668,112457324,112460321,112460953,112461961,112462559,112463320,112465995,112469358,112471712,112476052,112476766,112479933,112486361,112493812,112496514,112499322,112506438,112508651,112510311,112512837,112522808,112528221,112537568,112574985,112575643,	112430785,112435398,112435959,112437196,112439101,112440514,112441675,112443404,112450277,112451242,112452303,112454092,112454689,112455811,112457456,112460493,112461087,112462124,112462705,112463494,112466135,112469538,112471829,112476149,112476908,112480082,112486478,112494006,112496682,112499434,112506549,112508803,112510407,112513052,112522889,112528346,112537670,112575493,112575828,	7476	LAMA4	laminin, alpha 4	360	10.46	1.39	2083	72.89	9.74	2229	95.01	12.7		7.00719	9.13669
16474	NM_022131	chr3	+	139654026	140286919	139654216	140285095	17	139654026,139894792,140122470,140123399,140139966,140167360,140178362,140185451,140251165,140265356,140275354,140277481,140280979,140281652,140281921,140282802,140284894,	139654325,139894915,140122666,140123608,140140116,140167546,140178611,140185573,140251328,140265523,140275503,140277699,140281150,140281798,140282045,140282987,140286919,	4882	CLSTN2	calsyntenin 2	217	6.3	1.29	1095	38.31	7.84	938	39.98	8.18		6.07752	6.34109
13366	NM_002380,NM_030583	chr8	+	98881310	99048946	98900328	99047940	19	98881310,98900302,98943180,98954004,98973635,98991113,99006707,99015888,99019332,99019706,99028767,99030221,99033432,99039643,99042689,99044473,99045269,99045788,99047884,	98881515,98900470,98943750,98954127,98973758,98991236,99006830,99016011,99019455,99019829,99028890,99030344,99033555,99040057,99042842,99044545,99045404,99045887,99048946,	4108	MATN2	matrilin 2	194	5.63	1.37	954	33.38	8.12	784	33.41	8.13		5.92701	5.93431
15208	NM_001012333,NM_001012334,NM_002391	chr11	+	46402617	46405375	46403607	46405044	6	46402617,46403218,46403606,46403843,46404136,46405018,	46402838,46403435,46403683,46404011,46404298,46405375,	1202	MDK	midkine (neurite growth-promoting factor 2)	146	4.24	3.52	673	23.55	19.59	618	26.34	21.91		5.56534	6.22443
8075	NM_001145031,NM_002658	chr10	+	75670861	75677258	75671313	75676323	11	75670861,75671282,75671798,75671972,75672681,75673047,75673296,75673737,75674533,75675008,75676146,	75670976,75671683,75671826,75672080,75672856,75673139,75673516,75673886,75674674,75675157,75677258,	2690	PLAU	plasminogen activator, urokinase	178	5.17	1.92	762	26.66	9.91	771	32.86	12.21		5.16146	6.35938
1587	NM_004390	chr15	-	79214091	79237420	79214471	79237323	12	79214091,79215334,79217675,79220054,79221753,79223792,79224713,79227319,79228021,79229659,79231481,79237232,	79214547,79215460,79217782,79220123,79221835,79223848,79224800,79227424,79228092,79229765,79231513,79237420,	1485	CTSH	cathepsin H	1016	29.53	19.88	3628	126.96	85.49	1890	80.56	54.24		4.3003	2.72837
18126	NM_000927	chr7	-	87133178	87342639	87133558	87229500	29	87133178,87135212,87138590,87144546,87145824,87148641,87150091,87160609,87165773,87168583,87170672,87173444,87174138,87175178,87178663,87179166,87179486,87179783,87180040,87183076,87190578,87195385,87196100,87199487,87214827,87225081,87229432,87230070,87342476,	87133765,87135359,87138797,87144744,87145981,87148782,87150192,87160813,87165857,87168661,87170780,87173591,87174315,87175340,87178834,87179370,87179612,87179894,87180154,87183248,87190703,87195557,87196292,87199539,87214996,87225130,87229506,87230394,87342639,	4716	ABCB1	ATP-binding cassette, sub-family B (MDR/TAP), member 1	159	4.62	0.97	561	19.63	4.16	444	18.92	4.01		4.28866	4.13402
474	NM_000104	chr2	-	38294745	38303323	38297864	38302531	3	38294745,38301488,38302922,	38298453,38302532,38303323,	5153	CYP1B1	cytochrome P450, family 1, subfamily B, polypeptide 1	298	8.66	1.68	1061	37.12	7.2	1241	52.89	10.26		4.28571	6.10714
10876	NM_018728	chr15	-	52484514	52587995	52486098	52587833	41	52484514,52487573,52488505,52497061,52498012,52500750,52503926,52505384,52506799,52510715,52511955,52513358,52515740,52517097,52517271,52517635,52521329,52524818,52527866,52529678,52531929,52534244,52536552,52537550,52538152,52539113,52539654,52540896,52543586,52545513,52548835,52553058,52556386,52561949,52563959,52564776,52567758,52571069,52571705,52574978,52587806,	52486251,52487654,52488680,52497344,52498163,52500840,52504081,52505483,52506887,52510884,52512019,52513452,52515921,52517178,52517335,52517729,52521510,52524882,52527960,52529843,52532076,52534410,52536764,52537662,52538239,52539211,52539789,52540980,52543712,52545654,52548917,52553324,52556493,52562057,52564041,52564920,52567915,52571214,52571871,52575089,52587995,	6975	MYO5C	myosin VC	117	3.4	0.48	400	13.99	2	346	14.74	2.11		4.16667	4.39583
7248	NM_016946	chr1	-	160965000	160991133	160968660	160990863	10	160965000,160968832,160969185,160969429,160969665,160969935,160970420,160970809,160971074,160990799,	160968696,160968881,160969198,160969537,160969768,160970138,160970567,160970917,160971143,160991133,	4830	F11R	F11 receptor	153	4.44	0.91	496	17.35	3.59	488	20.8	4.3		3.94505	4.72527
9859	NM_001005914,NM_004636	chr3	+	50305039	50314572	50306672	50314137	18	50305039,50306592,50307557,50307863,50308320,50308518,50308791,50310728,50310965,50311189,50311343,50311793,50312273,50312442,50312732,50312990,50313135,50313732,	50305201,50306780,50307715,50307926,50308440,50308612,50308911,50310874,50311077,50311259,50311488,50312013,50312365,50312484,50312890,50313046,50313275,50314572,	2926	SEMA3B	sema domain, immunoglobulin domain (Ig), short basic domain, secreted, (semaphorin) 3B	206	5.98	2.04	652	22.81	7.79	630	26.85	9.17		3.81863	4.4951
13324	NM_002754	chr6	+	36098261	36107842	36098359	36107150	12	36098261,36099047,36100397,36103529,36103795,36104260,36104432,36104655,36106141,36106478,36106655,36107070,	36098478,36099177,36100456,36103638,36103825,36104308,36104547,36104727,36106221,36106557,36106832,36107842,	1888	MAPK13	mitogen-activated protein kinase 13	181	5.26	2.78	570	19.94	10.56	372	15.85	8.39		3.79856	3.01799
8904	NM_001243597,NM_016952	chr11	-	125826712	125933187	125830836	125893371	20	125826712,125831549,125848198,125850943,125853766,125859531,125864178,125864765,125867101,125871613,125873796,125875653,125880235,125885135,125886982,125888224,125889513,125891142,125893295,125933120,	125831000,125831893,125848278,125851224,125853988,125859654,125864284,125864947,125867305,125871745,125873971,125875952,125880589,125885405,125887270,125888368,125889660,125891415,125893432,125933187,	8116	CDON	Cdon homolog (mouse)	179	5.2	0.64	559	19.56	2.41	631	26.89	3.31		3.76562	5.17188
2506	NM_001013257,NM_005581	chr19	+	45312337	45324678	45312381	45324178	15	45312337,45314481,45315419,45315734,45316506,45316694,45317408,45317860,45321778,45321997,45322312,45322602,45322838,45323961,45324172,	45312463,45314603,45315648,45315805,45316603,45316877,45317545,45318017,45321894,45322139,45322449,45322747,45323610,45324079,45324678,	3058	BCAM	basal cell adhesion molecule (Lutheran blood group)	116	3.37	1.1	361	12.63	4.13	393	16.75	5.47		3.75455	4.97273
4833	NM_001204366,NM_001204367,NM_001204368,NM_002413	chr4	+	140586921	140661899	140587173	140625302	6	140586921,140599696,140616350,140624608,140625169,140661365,	140587231,140599796,140616421,140624690,140625406,140661899,	1334	MGST2	microsomal glutathione S-transferase 2	164	4.76	3.56	502	17.56	13.16	382	16.28	12.2		3.69663	3.42697
3083	NM_001143995,NM_004811	chr11	-	58294343	58345639	58294926	58345519	10	58294343,58295515,58317258,58317445,58318537,58322313,58331627,58338028,58343232,58345491,	58295196,58295664,58317340,58317619,58318705,58322413,58331674,58338186,58343390,58345639,	2037	LPXN	leupaxin	277	8.05	3.95	818	28.62	14.05	475	20.24	9.93		3.55696	2.51392
346	NM_001170820	chr11	-	1753639	1771824	1756509	1771672	3	1753639,1768896,1771588,	1756659,1769349,1771824,	3709	IFITM10	interferon induced transmembrane protein 10	230	6.68	1.8	663	23.2	6.25	938	39.98	10.77		3.47222	5.98333
6366	NM_001831	chr8	-	27454433	27472328	27455757	27468088	9	27454433,27455976,27457296,27461807,27462440,27463870,27466454,27467991,27472171,	27455767,27456152,27457526,27461912,27462852,27464041,27466603,27468117,27472328,	2860	CLU	clusterin	1010	29.35	10.26	2822	98.75	34.52	2081	88.7	31.01		3.36452	3.02242
16640	NM_052906	chr22	-	37763999	37823505	37769111	37771574	3	37763999,37813807,37823332,	37772036,37813958,37823505,	8361	ELFN2	extracellular leucine-rich repeat and fibronectin type III domain containing 2	344	9.99	1.19	906	31.7	3.79	761	32.43	3.87		3.18487	3.2521
3047	NM_001081676,NM_001081677,NM_006922	chr2	-	165944029	166060577	165946659	166032904	29	165944029,165948763,165950883,165952020,165952976,165953761,165956811,165969394,165970325,165971964,165984140,165986449,165987753,165994388,165995985,165997160,166003248,166010961,166012271,166018817,166019065,166020127,166020311,166020901,166025245,166026939,166032640,166043060,166060332,	165947855,165949034,165950988,165952158,165953030,165954034,165956934,165969568,165970480,165972085,165984611,165986806,165987927,165994627,165996118,165997508,166003539,166011168,166012413,166018881,166019338,166020219,166020403,166021030,166025335,166027058,166032954,166043257,166060577,	9217	SCN3A	sodium channel, voltage-gated, type III, alpha subunit	751	21.83	2.36	1967	68.83	7.46	1515	64.57	7		3.16102	2.9661
4509	NM_021965	chr9	+	70971814	71145977	70972043	71144572	11	70971814,70993114,70999313,71002378,71006449,71007234,71080008,71094333,71098780,71114142,71144482,	70972304,70993277,70999460,71002504,71006640,71007389,71080124,71094469,71098964,71114277,71145977,	3338	PGM5	phosphoglucomutase 5	622	18.08	5.41	1605	56.16	16.82	1260	53.7	16.08		3.10906	2.97227
15502	NM_032827	chr2	+	85980908	86018506	85981312	86014013	3	85980908,85991113,86014007,	85982080,85991305,86018506,	5863	ATOH8	atonal homolog 8 (Drosophila)	175	5.08	0.86	430	15.04	2.56	461	19.65	3.35		2.97674	3.89535
3305	NM_001100619,NM_001256438,NM_138375	chr18	+	20714527	20840434	20715726	20837331	12	20714527,20715726,20735788,20768801,20774411,20793940,20814571,20815858,20817105,20832923,20833692,20837190,	20714634,20716571,20735916,20768873,20774504,20794018,20814668,20816015,20817209,20833030,20833900,20840434,	5240	CABLES1	Cdk5 and Abl enzyme substrate 1	504	14.65	2.79	1225	42.86	8.17	1033	44.03	8.4		2.92832	3.01075
16164	NM_015039,NM_170706	chr1	-	183217371	183387634	183221775	183387402	12	183217371,183230136,183230336,183247687,183253129,183253844,183255796,183259262,183261924,183262839,183273804,183387317,	183221878,183230204,183230438,183247764,183253174,183253925,183255923,183259341,183261992,183262928,183274009,183387634,	5765	NMNAT2	nicotinamide nucleotide adenylyltransferase 2	611	17.76	3.08	1481	51.82	8.98	1338	57.03	9.89		2.91558	3.21104
9167	NM_001127392,NM_013279	chr11	+	61520120	61555989	61520216	61553615	28	61520120,61522860,61533096,61533429,61536731,61537717,61538971,61539300,61541438,61543527,61543793,61544258,61544735,61545205,61545851,61546734,61546969,61547313,61547693,61548183,61548428,61548609,61549044,61550969,61551322,61551751,61553271,61553534,	61520262,61522914,61533184,61533693,61536793,61537997,61539222,61539424,61541634,61543604,61543904,61544349,61544936,61545317,61545961,61546895,61547042,61547402,61547762,61548264,61548517,61548801,61549296,61551072,61551397,61551857,61553346,61555989,	5983	C11orf9	chromosome 11 open reading frame 9	113	3.28	0.54	267	9.34	1.56	197	8.39	1.4		2.88889	2.59259
13173	NM_000461,NM_001128176,NM_001128177,NM_001252634	chr3	-	24158644	24536313	24164374	24270450	12	24158644,24168989,24174806,24184991,24188165,24193880,24231564,24270428,24338716,24359848,24378790,24536142,	24164616,24169248,24174953,24185197,24188313,24193981,24231825,24270492,24338862,24359985,24378862,24536313,	7684	THRB	thyroid hormone receptor, beta	134	3.89	0.5	316	11.05	1.43	217	9.24	1.2		2.86	2.4
16792	NM_001199037,NM_001199038,NM_001199039,NM_018565,NM_178865	chr1	+	31882411	31907527	31882684	31907046	14	31882411,31883020,31885962,31886659,31888719,31896539,31897529,31898176,31898622,31899500,31901824,31902243,31905813,31906910,	31882699,31883282,31886151,31887624,31888754,31896701,31897720,31898256,31898760,31899670,31901915,31902385,31906032,31907527,	3549	SERINC2	serine incorporator 2	1552	45.11	12.71	3684	128.92	36.32	3124	133.16	37.52		2.85759	2.95201
16471	NM_005139	chr4	+	79472741	79531605	79475627	79531269	13	79472741,79475589,79494333,79500180,79503330,79507413,79512697,79516534,79516947,79518472,79522663,79525430,79531209,	79473013,79475642,79494421,79500275,79503444,79507504,79512777,79516591,79517041,79518568,79522722,79525553,79531605,	1618	ANXA3	annexin A3	118	3.43	2.11	277	9.69	5.98	346	14.74	9.11		2.83412	4.31754
14220	NM_018476	chrX	-	102317580	102319168	102317824	102318202	3	102317580,102318569,102319023,	102318207,102318659,102319168,	862	BEX1	brain expressed, X-linked 1	2492	72.43	84.02	5863	205.17	238.01	5097	217.26	252.04		2.83278	2.99976
2163	NM_020433,NM_175913	chr20	-	42740336	42816218	42743435	42815345	7	42740336,42743421,42744304,42747144,42788257,42805456,42814966,	42742143,42743516,42745026,42747263,42789047,42806612,42816218,	5941	JPH2	junctophilin 2	145	4.21	0.7	333	11.65	1.96	285	12.14	2.04		2.8	2.91429
16558	NM_001098484,NM_001134742,NM_003759	chr4	+	72053002	72437804	72102293	72433610	26	72053002,72102292,72120936,72204769,72215628,72222724,72263293,72306332,72313362,72316105,72316904,72319211,72332160,72338415,72352664,72363217,72397778,72399943,72412066,72413364,72420856,72423428,72425809,72429509,72432720,72433504,	72053118,72102366,72121116,72205222,72215789,72222904,72263370,72306490,72313450,72316260,72317018,72319386,72332294,72338687,72352735,72363409,72397892,72400105,72412245,72413437,72420925,72423602,72425971,72429606,72432800,72437804,	8010	SLC4A4	solute carrier family 4, sodium bicarbonate cotransporter, member 4	171	4.97	0.62	389	13.61	1.69	321	13.68	1.7		2.72581	2.74194
18163	NM_001143818,NM_002575	chr18	+	61554938	61571124	61558678	61570539	9	61554938,61557071,61558669,61562497,61564324,61564960,61568973,61569637,61570134,	61555004,61557329,61558846,61562617,61564453,61565078,61569116,61569802,61571124,	2166	SERPINB2	serpin peptidase inhibitor, clade B (ovalbumin), member 2	1365	39.67	18.31	3074	107.57	49.66	2206	94.03	43.41		2.71218	2.37084
12812	NM_001409	chr1	-	3404505	3528059	3407091	3527832	37	3404505,3407475,3409202,3410334,3410559,3410934,3411176,3412453,3413218,3413551,3413796,3414934,3415261,3415701,3416151,3416359,3417196,3417529,3417740,3418359,3421771,3421985,3422671,3424358,3425121,3425638,3426433,3427346,3428113,3428569,3431113,3431965,3440687,3496388,3511901,3519029,3527701,	3407153,3407523,3409331,3410463,3410688,3411063,3411305,3412582,3413347,3413683,3413925,3415063,3415390,3415830,3416280,3416488,3417328,3417658,3417872,3418485,3421906,3422120,3422800,3424487,3425253,3425809,3426556,3427466,3428251,3428692,3431236,3432091,3440810,3496493,3512011,3519164,3528059,	7439	MEGF6	multiple EGF-like-domains 6	1361	39.56	5.31	3059	107.05	14.39	3331	141.98	19.08		2.70998	3.59322
1598	NM_001252335,NM_032866	chr15	+	57668702	57842925	57730197	57839688	20	57668702,57713333,57730182,57732574,57734570,57743697,57744338,57745880,57753877,57808977,57810590,57815686,57816778,57820851,57823887,57835893,57836670,57837789,57838273,57839552,	57668765,57713448,57731799,57732669,57734676,57743799,57744487,57746016,57754090,57809184,57810695,57815839,57816949,57821013,57823977,57835977,57836795,57837898,57838437,57842925,	7339	CGNL1	cingulin-like 1	155	4.5	0.61	339	11.86	1.61	250	10.65	1.45		2.63934	2.37705
11027	NM_174941	chr12	-	7507556	7596749	7509999	7596723	20	7507556,7509975,7519831,7520682,7521528,7521952,7525915,7527037,7527426,7527876,7528295,7531573,7548690,7550859,7556130,7559127,7585011,7585969,7593749,7596692,	7507726,7510082,7519927,7520793,7521561,7522261,7526236,7527352,7527519,7528191,7528610,7531894,7549011,7551180,7556451,7559448,7585332,7586290,7593842,7596749,	4582	CD163L1	CD163 molecule-like 1	388	11.27	2.45	844	29.53	6.44	571	24.33	5.3		2.62857	2.16327
14839	NM_001201427,NM_015345	chr6	+	39760158	39872653	39824078	39869813	26	39760158,39760772,39824022,39828703,39832208,39832755,39835285,39836598,39838115,39839281,39841013,39843105,39845978,39846179,39846953,39851737,39855261,39856454,39859116,39859409,39864587,39864950,39866652,39867852,39869077,39869588,	39760241,39760919,39824246,39828793,39832283,39832850,39835619,39836709,39838219,39839348,39841131,39843244,39846037,39846364,39847253,39851845,39855368,39856539,39859223,39859498,39864756,39865058,39866713,39867984,39869248,39872653,	6333	DAAM2	dishevelled associated activator of morphogenesis 2	869	25.26	3.98	1852	64.81	10.23	1697	72.33	11.42		2.57035	2.86935
12441	NM_020348	chr10	+	101088855	101154087	101089144	101151273	11	101088855,101117268,101120591,101121983,101124173,101124711,101136811,101147576,101147908,101150062,101151193,	101090717,101117412,101120732,101122153,101124273,101124759,101136975,101147760,101148058,101150164,101154087,	5959	CNNM1	cyclin M1	218	6.33	1.06	459	16.06	2.69	415	17.68	2.96		2.53774	2.79245
1869	NM_001103184	chr15	-	33057746	33360085	33066510	33360085	17	33057746,33069035,33091004,33096481,33149215,33180372,33191034,33192179,33194111,33200690,33202674,33218374,33256307,33260914,33300214,33357157,33358711,	33066555,33069120,33091154,33096533,33149308,33180493,33191094,33192326,33194241,33200779,33202736,33218462,33256458,33261678,33300276,33357275,33360085,	12355	FMN1	formin 1	288	8.37	0.67	601	21.03	1.7	413	17.6	1.42		2.53731	2.1194
11318	NM_001184723,NM_138786	chr3	-	149036284	149051548	149039264	149051169	6	149036284,149040042,149042666,149048116,149050992,149051299,	149039279,149040223,149042809,149048206,149051259,149051548,	3925	TM4SF18	transmembrane 4 L six family member 18	362	10.52	2.68	762	26.66	6.79	619	26.38	6.72		2.53358	2.50746
11136	NM_002506	chr1	-	115828536	115880857	115828690	115829416	3	115828536,115836247,115880824,	115829428,115836371,115880857,	1049	NGF	nerve growth factor (beta polypeptide)	290	8.43	8.03	604	21.13	20.14	425	18.11	17.26		2.50809	2.14944
6042	NM_005211	chr5	-	149432853	149492935	149433631	149465990	22	149432853,149433884,149434799,149435588,149435781,149436849,149437066,149439262,149440424,149441053,149441285,149447777,149449435,149449744,149450018,149452863,149456838,149457674,149459614,149460329,149465941,149492823,	149433787,149433993,149434899,149435700,149435904,149436947,149437155,149439425,149440535,149441158,149441412,149447893,149449626,149449865,149450134,149453056,149456998,149457811,149459899,149460587,149466170,149492935,	3989	CSF1R	colony stimulating factor 1 receptor	118	3.43	0.85	243	8.5	2.13	217	9.24	2.31		2.50588	2.71765
1360	NM_002998	chr8	+	97505881	97624037	97506499	97621776	5	97505881,97605707,97614622,97620562,97621612,	97506559,97605819,97614756,97620698,97624037,	3485	SDC2	syndecan 2	555	16.13	4.62	1149	40.2	11.53	824	35.12	10.07		2.49567	2.17965
14880	NM_001256267,NM_001256268,NM_032578	chr10	+	69865873	69971773	69881195	69970212	25	69865873,69869189,69873989,69881194,69895215,69895966,69896356,69902696,69905231,69908109,69909796,69918242,69921485,69925458,69926050,69933822,69935079,69948661,69954119,69955206,69957108,69959124,69961585,69966526,69970042,	69865940,69869480,69874053,69882097,69895269,69896020,69896488,69902872,69905283,69908224,69909868,69918384,69921509,69925575,69926423,69934413,69935218,69948883,69954269,69955289,69957235,69959332,69961751,69966660,69971773,	6187	MYPN	myopalladin	1048	30.46	4.92	2170	75.93	12.27	1553	66.19	10.69		2.4939	2.17276
18522	NM_001040147,NM_003784	chr18	+	61420276	61472604	61449606	61471869	9	61420276,61442611,61449588,61459626,61460394,61463499,61465837,61468099,61471470,	61420354,61442950,61449774,61459677,61460511,61463617,61465980,61468246,61472604,	2313	SERPINB7	serpin peptidase inhibitor, clade B (ovalbumin), member 7	215	6.24	2.69	433	15.15	6.54	248	10.57	4.56		2.43123	1.69517
8210	NM_018327	chr20	+	12989626	13147411	12989915	13145514	12	12989626,13029592,13052903,13054996,13071730,13074130,13090758,13098152,13107237,13134649,13140649,13145400,	12990032,13029778,13053058,13055145,13071855,13074224,13090864,13098372,13107364,13134785,13140779,13147411,	3845	SPTLC3	serine palmitoyltransferase, long chain base subunit 3	896	26.04	6.77	1798	62.92	16.36	1502	64.02	16.65		2.41654	2.45938
984	NM_012156,NM_177996	chr20	+	34700347	34820721	34761699	34817262	23	34700347,34742661,34761685,34763472,34765873,34766551,34770193,34773038,34775597,34776268,34778198,34778543,34782133,34783250,34785780,34797409,34800193,34802278,34806797,34807682,34809785,34810199,34817253,	34700402,34742818,34761876,34763637,34765978,34766594,34770269,34773257,34775685,34776421,34778296,34778719,34782282,34783286,34785963,34797820,34800298,34802362,34806884,34807766,34809866,34810316,34820721,	6331	EPB41L1	erythrocyte membrane protein band 4.1-like 1	728	21.16	3.34	1457	50.98	8.05	1439	61.33	9.68		2.41018	2.8982
15936	NM_001242463,NM_058229,NM_148177	chr8	-	124510126	124553493	124515612	124553254	9	124510126,124516843,124518631,124525437,124526479,124544137,124545430,124546941,124553138,	124515702,124516987,124518814,124525622,124526573,124544383,124545480,124547054,124553493,	6946	FBXO32	F-box protein 32	2583	75.08	10.8	5148	180.15	25.93	4217	179.75	25.87		2.40093	2.39537
17249	NM_001195303,NM_001254748,NM_001254749,NM_003617	chr1	-	163112088	163291581	163117131	163172625	7	163112088,163122327,163131704,163138047,163172581,163276022,163291411,	163117293,163122506,163131766,163138158,163172963,163276119,163291581,	6206	RGS5	regulator of G-protein signaling 5	141	4.09	0.65	277	9.69	1.56	207	8.82	1.42		2.4	2.18462
7659	NM_001101676,NM_207506	chr8	-	119201694	119634184	119209948	119634055	5	119201694,119390226,119452070,119592953,119634042,	119209971,119391939,119452200,119593132,119634184,	10441	SAMD12	sterile alpha motif domain containing 12	211	6.13	0.58	412	14.41	1.38	343	14.62	1.4		2.37931	2.41379
2952	NM_001025616,NM_001042669,NM_031305	chr4	+	86396283	86923823	86491694	86921875	12	86396283,86491674,86643037,86699850,86844800,86851425,86863218,86893188,86896040,86898722,86915735,86921631,	86396712,86491874,86643125,86700118,86844923,86852195,86863426,86893321,86896114,86898844,86916810,86923823,	5682	ARHGAP24	Rho GTPase activating protein 24	484	14.06	2.47	946	33.1	5.82	729	31.07	5.46		2.35628	2.21053
8231	NM_000577,NM_173841,NM_173842,NM_173843	chr2	+	113875469	113891593	113875595	113890448	7	113875469,113877642,113879024,113885137,113887152,113888621,113890232,	113875605,113877705,113879195,113885317,113887241,113888734,113891593,	2113	IL1RN	interleukin 1 receptor antagonist	156	4.53	2.14	304	10.63	5.03	233	9.93	4.69		2.35047	2.19159
9611	NM_001430	chr2	+	46524540	46613842	46525050	46611799	16	46524540,46574011,46583289,46583862,46587776,46588023,46596965,46602828,46603677,46605032,46605795,46607365,46608734,46609113,46609563,46611647,	46525076,46574202,46583441,46583947,46587895,46588229,46597072,46602976,46603892,46605226,46605906,46607856,46608861,46609228,46609737,46613842,	5166	EPAS1	endothelial PAS domain protein 1	665	19.33	3.74	1290	45.14	8.73	1299	55.37	10.71		2.33422	2.86364
225	NM_001193268,NM_001193269,NM_012155	chr19	-	46112657	46148775	46112920	46148702	24	46112657,46116798,46117862,46119059,46119718,46120022,46120887,46122317,46124464,46124740,46127976,46129962,46133208,46136118,46136327,46137579,46141762,46142102,46142614,46144898,46145175,46145391,46146836,46148530,	46113046,46116929,46117958,46119147,46119816,46120111,46120955,46122449,46124590,46124895,46128076,46130097,46133304,46136229,46136397,46137729,46141892,46142131,46142675,46145006,46145299,46145610,46146985,46148775,	3099	EML2	echinoderm microtubule associated protein like 2	144	4.18	1.34	276	9.65	3.11	203	8.65	2.79		2.3209	2.08209
692	NM_001159554,NM_005446	chr22	+	21369441	21382302	21369463	21380906	12	21369441,21370230,21372277,21376964,21377230,21377406,21377563,21377797,21380093,21380299,21380540,21380708,	21369627,21370381,21372349,21377040,21377324,21377487,21377705,21377907,21380187,21380365,21380618,21382302,	2744	P2RX6	purinergic receptor P2X, ligand-gated ion channel, 6	105	3.05	1.11	200	6.99	2.54	170	7.24	2.63		2.28829	2.36937
605	NM_014326	chr15	-	64199234	64338521	64200718	64332460	12	64199234,64204106,64204306,64217014,64218139,64221749,64222605,64231430,64263621,64275731,64332368,64338496,	64200799,64204190,64204396,64217060,64218292,64221776,64222654,64231560,64263760,64275953,64332466,64338521,	2628	DAPK2	death-associated protein kinase 2	159	4.62	1.75	300	10.49	3.99	243	10.35	3.93		2.28	2.24571
4732	NM_005346	chr6	+	31795511	31798031	31795727	31797653	1	31795511,	31798031,	2520	HSPA1B	heat shock 70kDa protein 1B	1329	38.63	15.32	2509	87.8	34.84	1968	83.88	33.28		2.27415	2.17232
12630	NM_001191056,NM_001191057,NM_001191058,NM_001191059,NM_005020	chr7	-	31792631	32338383	31792997	32338347	23	31792631,31815277,31829246,31848644,31855537,31862686,31864480,31867905,31876793,31877483,31887581,31890254,31904555,31912904,31917582,31918608,31920359,32091165,32109904,32110590,32209396,32249100,32338262,	31793167,31815346,31829873,31848722,31855768,31862862,31864601,31867987,31876914,31877585,31887710,31890355,31904696,31913021,31917649,31918791,31920473,32091192,32110466,32111045,32209568,32249151,32338383,	4383	PDE1C	phosphodiesterase 1C, calmodulin-dependent 70kDa	1484	43.13	9.84	2746	96.09	21.92	1979	84.35	19.24		2.22764	1.95528
4380	NM_001144757,NM_003020	chr15	+	32933869	32989298	32935793	32988810	6	32933869,32935786,32971966,32976757,32983910,32988714,	32933979,32936019,32972116,32976870,32983964,32989298,	1244	SCG5	secretogranin V (7B2 protein)	1509	43.86	35.25	2784	97.42	78.31	1718	73.23	58.86		2.22156	1.66979
12743	NM_014787	chr1	+	65730429	65881552	65730593	65878708	19	65730429,65830317,65831567,65831730,65845084,65849875,65851394,65852494,65854018,65854938,65855229,65858113,65860580,65864495,65867443,65871552,65874323,65876932,65878606,	65730615,65830468,65831617,65831879,65845207,65850009,65851589,65852612,65854098,65855132,65855310,65858548,65860715,65864564,65867563,65871816,65874466,65877109,65881552,	5750	DNAJC6	DnaJ (Hsp40) homolog, subfamily C, member 6	723	21.01	3.65	1327	46.43	8.07	987	42.07	7.31		2.21096	2.00274
2273	NM_183387	chr14	-	89081173	89259096	89082161	89258847	43	89081173,89082485,89083069,89084571,89084993,89087097,89087456,89088947,89091313,89093181,89093989,89100812,89105152,89109236,89110776,89116255,89123719,89124530,89127997,89129374,89130836,89131680,89148233,89151358,89153559,89154614,89160650,89161704,89163190,89168789,89171203,89171825,89172602,89178614,89181282,89192884,89202707,89205222,89206730,89210366,89212528,89220855,89258650,	89082198,89082586,89083223,89084675,89085156,89087270,89087645,89089062,89091471,89093390,89094163,89100833,89105251,89109366,89110864,89116270,89123846,89124732,89128174,89129463,89130968,89131833,89148375,89151486,89153671,89154817,89160751,89161798,89163296,89168976,89171322,89171932,89172770,89178827,89181539,89193022,89202909,89205358,89206916,89210435,89212627,89221015,89259096,	7171	EML5	echinoderm microtubule associated protein like 5	119	3.45	0.48	219	7.66	1.06	157	6.69	0.93		2.20833	1.9375
11328	NM_001162371	chr17	-	5402746	5404319	5403916	5404276	2	5402746,5403350,	5403270,5404319,	1493	LOC728392	uncharacterized LOC728392	599	17.41	11.66	1095	38.31	25.65	1093	46.59	31.2		2.19983	2.67581
16203	NM_001017963,NM_005348	chr14	-	102547074	102606086	102548048	102605741	13	102547074,102548447,102549370,102549882,102550129,102550735,102551017,102551634,102552094,102552553,102553322,102568211,102605586,	102548158,102548781,102549639,102550030,102550320,102550901,102551335,102551768,102552461,102552715,102553512,102568422,102606086,	4074	HSP90AA1	heat shock protein 90kDa alpha (cytosolic), class A member 1	36980	1074.97	263.86	66491	2326.86	571.14	54178	2309.4	566.86		2.16456	2.14834
8889	NM_001173523,NM_002589,NM_032456,NM_032457	chr4	+	30722029	31148423	30723044	31144471	4	30722029,30732374,30921774,31144094,	30726957,30732838,30921991,31148423,	9938	PCDH7	protocadherin 7	438	12.73	1.28	786	27.5	2.76	1069	45.56	4.58		2.15625	3.57812
4987	NM_020169	chr3	-	158384202	158390482	158384434	158390267	6	158384202,158384800,158386784,158387221,158388745,158390138,	158384533,158384863,158386921,158387399,158388808,158390482,	1116	LXN	latexin	751	21.83	19.56	1339	46.85	41.98	1613	68.75	61.6		2.14622	3.14928
17429	NM_006644	chr13	-	31710762	31736117	31711454	31735719	18	31710762,31712543,31712917,31713136,31714320,31715258,31717928,31719699,31722095,31722510,31724090,31725083,31725745,31726988,31728769,31729650,31732942,31735612,	31711661,31712705,31713037,31713244,31714446,31715396,31718060,31719905,31722229,31722617,31724319,31725328,31725879,31727088,31728892,31729791,31733000,31736117,	3667	HSPH1	heat shock 105kDa/110kDa protein 1	8627	250.77	68.38	15375	538.04	146.72	12993	553.84	151.03		2.14566	2.20869
14559	NM_001003395,NM_001003396,NM_001003397,NM_003287	chr6	+	125474878	125584644	125475097	125584108	8	125474878,125475419,125541223,125550263,125569427,125574862,125578243,125583979,	125475116,125475678,125541339,125550412,125569529,125574901,125578304,125584644,	1629	TPD52L1	tumor protein D52-like 1	310	9.01	5.53	546	19.1	11.72	434	18.49	11.35		2.11935	2.05244
10363	NM_207517	chr15	+	84322837	84708593	84324513	84706558	30	84322837,84324480,84373140,84442274,84473401,84488562,84506840,84527517,84539553,84553852,84558860,84560080,84561435,84566609,84568398,84581843,84592655,84611347,84611654,84639235,84651024,84657442,84659837,84683293,84685134,84690161,84693989,84700086,84705524,84706451,	84323028,84324582,84373260,84442402,84473447,84488799,84506967,84527592,84539711,84553964,84558999,84560131,84561640,84566757,84568483,84582130,84592785,84611540,84611834,84639389,84652096,84657570,84659966,84683476,84685251,84690345,84694188,84700184,84705739,84708593,	7335	ADAMTSL3	ADAMTS-like 3	117	3.4	0.46	204	7.13	0.97	198	8.43	1.14		2.1087	2.47826
5842	NM_001017424,NM_001017425,NM_014217	chr1	+	215178884	215410436	215179264	215408488	8	215178884,215256559,215259710,215297975,215342541,215345339,215368295,215408170,	215179298,215256774,215260021,215298093,215342702,215345526,215368435,215410436,	3812	KCNK2	potassium channel, subfamily K, member 2	503	14.62	3.83	879	30.76	8.06	942	40.15	10.53		2.10444	2.74935
18229	NM_001141945,NM_001613	chr10	-	90694830	90751147	90694979	90708687	10	90694830,90697817,90699263,90700985,90701541,90703553,90707014,90708558,90712487,90750695,	90695123,90697999,90699455,90701147,90701626,90703664,90707143,90708710,90712580,90751147,	1851	ACTA2	actin, alpha 2, smooth muscle, aorta	525	15.26	8.24	915	32.02	17.29	803	34.22	18.48		2.0983	2.24272
257	NM_015645	chr11	-	119209651	119217383	119210040	119211107	15	119209651,119210893,119211404,119212566,119213305,119213582,119214525,119215024,119215341,119215583,119216129,119216482,119216755,119216981,119217169,	119210558,119211150,119212482,119212694,119213437,119213713,119214674,119215101,119215467,119215714,119216343,119216638,119216869,119217084,119217383,	3917	C1QTNF5	C1q and tumor necrosis factor related protein 5	108	3.13	0.79	185	6.47	1.65	173	7.37	1.88		2.08861	2.37975
8297	NM_031433	chr11	-	119209651	119217383	119212257	119217223	15	119209651,119210893,119211404,119212566,119213305,119213582,119214525,119215024,119215341,119215583,119216129,119216482,119216755,119216981,119217169,	119210558,119211150,119212482,119212694,119213437,119213713,119214674,119215101,119215467,119215714,119216343,119216638,119216869,119217084,119217383,	3917	MFRP	membrane frizzled-related protein	108	3.13	0.79	185	6.47	1.65	173	7.37	1.88		2.08861	2.37975
57	NM_015529	chr6	-	132617193	132722664	132618291	132722565	12	132617193,132618925,132636773,132641767,132643817,132645069,132649151,132649553,132693746,132693968,132695769,132722301,	132618456,132619094,132636916,132641827,132644009,132645236,132649254,132649733,132693830,132694136,132695916,132722664,	3039	MOXD1	monooxygenase, DBH-like 1	299	8.69	2.85	516	18.05	5.93	435	18.54	6.1		2.0807	2.14035
13309	NM_001172656,NM_001172657,NM_001172658,NM_001172659,NM_001172660,NM_020972	chr4	-	2271323	2420370	2272451	2420050	16	2271323,2273037,2273401,2274899,2275788,2306015,2321896,2330305,2331979,2337431,2339133,2341179,2343204,2355659,2366212,2420011,	2272583,2273141,2273506,2275016,2275943,2307263,2321998,2330869,2332775,2337521,2339223,2341382,2343342,2355800,2366604,2420370,	5864	ZFYVE28	zinc finger, FYVE domain containing 28	293	8.51	1.45	504	17.63	3	440	18.75	3.19		2.06897	2.2
2870	NM_006332	chr19	+	18284578	18288927	18284651	18288721	7	18284578,18285849,18286120,18286414,18287949,18288520,18288658,	18284783,18286032,18286195,18286507,18288102,18288574,18288927,	1032	IFI30	interferon, gamma-inducible protein 30	166	4.82	4.67	283	9.9	9.59	258	10.99	10.64		2.05353	2.27837
15648	NM_004938	chr9	+	90112755	90323549	90113992	90322279	26	90112755,90113884,90219868,90252857,90254268,90254564,90254703,90255212,90255716,90256883,90258290,90260809,90261375,90262219,90263695,90264835,90266441,90272943,90283511,90296318,90301465,90311921,90313570,90315031,90317943,90321046,	90113022,90114054,90220090,90252996,90254398,90254613,90254730,90255365,90255762,90256973,90258383,90260929,90261474,90262318,90263794,90265033,90266639,90273042,90283589,90296541,90301654,90312119,90313709,90315152,90318132,90323549,	5938	DAPK1	death-associated protein kinase 1	2078	60.4	10.17	3520	123.18	20.74	3158	134.61	22.66		2.03933	2.22812
8206	NM_003713	chr1	-	56960418	57045257	56962222	57044689	6	56960418,56977647,56989494,56989948,57002626,57044550,	56962348,56977824,56989552,56990226,57002784,57045257,	3308	PPAP2B	phosphatidic acid phosphatase type 2B	507	14.73	4.45	856	29.95	9.05	641	27.32	8.25		2.03371	1.85393
722	NM_001085375,NM_001135240	chr1	+	162348695	162356608	162348703	162353473	3	162348695,162351519,162352971,	162348821,162352008,162356608,	4252	C1orf226	chromosome 1 open reading frame 226	543	15.78	3.71	916	32.05	7.53	763	32.52	7.64		2.02965	2.0593
11036	NM_138440	chr16	+	4421848	4433529	4430878	4432900	2	4421848,4430869,	4421994,4433529,	2806	VASN	vasorin	726	21.1	7.51	1222	42.76	15.23	1415	60.31	21.49		2.02796	2.86152
9068	NM_006820	chr1	+	79086087	79111830	79093600	79107494	9	79086087,79093590,79094635,79095404,79101021,79102716,79106705,79107119,79107459,	79086256,79094078,79094684,79095600,79101174,79102888,79106806,79107294,79111830,	5874	IFI44L	interferon-induced protein 44-like	327	9.5	1.61	546	19.1	3.25	439	18.71	3.18		2.01863	1.97516
7133	NM_021219	chr21	+	27011588	27087235	27012133	27086984	10	27011588,27056194,27062177,27066067,27070988,27074481,27078290,27081745,27084651,27086951,	27012200,27056260,27062285,27066220,27071191,27074581,27078398,27081761,27084694,27087235,	1693	JAM2	junctional adhesion molecule 2	224	6.51	3.84	375	13.12	7.74	344	14.66	8.65		2.01562	2.2526
9501	NM_001007253	chr7	-	64450732	64467124	64451589	64453404	2	64450732,64466918,	64453792,64467124,	3266	ERV3-1	endogenous retrovirus group 3, member 1	213	6.19	1.89	354	12.38	3.79	316	13.46	4.12		2.00529	2.17989
15738	NM_001142861,NM_005585	chr15	+	66994673	67074337	66995596	67073873	5	66994673,67000929,67004005,67008758,67073334,	66996413,67001076,67004062,67008836,67074337,	3025	SMAD6	SMAD family member 6	125	3.63	1.2	207	7.24	2.39	257	10.95	3.61		1.99167	3.00833
172	NM_024923	chr3	-	13357736	13461809	13359180	13461726	40	13357736,13360571,13360729,13361262,13363084,13363692,13364808,13367294,13368716,13370270,13371959,13373792,13376953,13378286,13379336,13381353,13381735,13383247,13383495,13384674,13393378,13393579,13395053,13395414,13399721,13401769,13407445,13413333,13415217,13417003,13417790,13418955,13420411,13421062,13427774,13429802,13432710,13438856,13441224,13461559,	13359281,13360655,13360825,13361479,13363335,13363839,13364932,13367431,13368937,13370446,13372134,13373884,13377112,13378418,13379417,13381533,13381798,13383383,13383623,13384803,13393480,13393684,13395160,13395607,13399895,13401991,13407591,13413532,13415373,13417141,13417931,13419062,13420480,13421221,13427907,13429953,13432807,13438988,13441361,13461809,	7191	NUP210	nucleoporin 210kDa	1108	32.2	4.47	1820	63.69	8.85	1706	72.72	10.11		1.97987	2.26174
17661	NM_001004426,NM_001199562,NM_003560	chr22	-	38507501	38577836	38508167	38565433	18	38507501,38508510,38509493,38511533,38512081,38516765,38519101,38522377,38524275,38525460,38528837,38530994,38535988,38539111,38541444,38565224,38577670,38577790,	38508312,38508584,38509661,38511688,38512218,38516916,38519265,38522456,38524437,38525569,38529020,38531091,38536176,38539295,38541660,38565478,38577761,38577836,	3269	PLA2G6	phospholipase A2, group VI (cytosolic, calcium-independent)	109	3.16	0.96	177	6.19	1.89	142	6.05	1.85		1.96875	1.92708
1712	NM_014278	chr4	+	128703452	128754526	128703705	128754029	19	128703452,128715231,128716922,128719741,128722292,128722939,128724783,128725165,128726227,128726841,128729150,128732591,128739479,128741582,128743923,128744671,128748459,128751792,128753837,	128703812,128715289,128717063,128719864,128722392,128723073,128725028,128725242,128726379,128726948,128729284,128732791,128739575,128741720,128744049,128744779,128748579,128751954,128754526,	3270	HSPA4L	heat shock 70kDa protein 4-like	1021	29.67	9.07	1669	58.4	17.85	1429	60.91	18.62		1.96803	2.05292
13808	NM_001127213,NM_002346	chr8	+	144099901	144103827	144102356	144103206	4	144099901,144102299,144102730,144102982,	144100003,144102408,144102850,144103827,	1176	LY6E	lymphocyte antigen 6 complex, locus E	127	3.69	3.13	205	7.17	6.09	221	9.42	8.01		1.94569	2.55911
13359	NM_001012957,NM_001012958,NM_001012959,NM_001164537,NM_001164538,NM_001164539,NM_001164540,NM_001164541,NM_001164542,NM_001164544,NM_001164545,NM_001164546,NM_001164547,NM_001164548,NM_001164549,NM_001164550,NM_001164551,NM_001164552,NM_001164553,NM_001164554,NM_001164555,NM_001164556,NM_018662	chr1	+	231762560	232177019	231762613	232172577	19	231762560,231829571,231837700,231856593,231856692,231858284,231881149,231885671,231902885,231906580,231930987,231935853,231954074,231990484,232002268,232094573,232144530,232162180,232172437,	231762680,231830551,231838307,231856670,231856818,231859820,231881245,231886365,231903015,231907408,231931042,231935956,231954990,231991125,232002452,232095249,232145400,232162298,232177019,	13339	DISC1	disrupted in schizophrenia 1	251	7.29	0.54	404	14.13	1.05	319	13.59	1.01		1.94444	1.87037
14631	NM_001098540,NM_001166498,NM_001199830,NM_006665	chr4	-	84213613	84256306	84216496	84255935	13	84213613,84222112,84223302,84227355,84229997,84230554,84231183,84231874,84234266,84240496,84243371,84255708,84256200,	84216656,84222259,84223421,84227470,84230104,84230648,84231231,84232043,84234440,84240622,84243517,84256034,84256306,	4720	HPSE	heparanase	113	3.28	0.69	182	6.36	1.34	128	5.45	1.15		1.94203	1.66667
16445	NM_052874	chr16	-	31000576	31021829	31004141	31021717	10	31000576,31004450,31004667,31008003,31008271,31008822,31012248,31012414,31012849,31021687,	31004222,31004561,31004805,31008077,31008380,31008896,31012323,31012514,31012924,31021829,	4544	STX1B	syntaxin 1B	325	9.44	2.07	521	18.23	4.01	335	14.27	3.14		1.9372	1.51691
13116	NM_000694,NM_001030010,NM_001161473	chr11	+	67776047	67796743	67782767	67795406	11	67776047,67777789,67782766,67785996,67786241,67786638,67787183,67788953,67790062,67793476,67795216,	67776162,67777862,67782929,67786106,67786362,67786724,67787265,67789339,67790229,67793576,67796743,	2930	ALDH3B1	aldehyde dehydrogenase 3 family, member B1	421	12.23	4.17	676	23.65	8.07	694	29.58	10.09		1.93525	2.41966
16840	NM_002428	chr16	+	58059281	58080804	58060254	58079350	10	58059281,58071375,58072169,58073778,58074440,58075520,58076134,58077113,58077415,58078910,	58060416,58071524,58072298,58074086,58074602,58075774,58076273,58077264,58077531,58080804,	4437	MMP15	matrix metallopeptidase 15 (membrane-inserted)	378	10.98	2.47	604	21.13	4.76	665	28.34	6.38		1.92713	2.583
9177	NM_006517	chrX	+	73641084	73753752	73641250	73751388	6	73641084,73740824,73744193,73745584,73749047,73751167,	73641902,73740969,73744644,73745728,73749276,73753752,	4372	SLC16A2	solute carrier family 16, member 2 (monocarboxylic acid transporter 8)	2290	66.56	15.22	3599	125.94	28.8	3477	148.21	33.89		1.89225	2.22668
15842	NM_001856	chr1	-	32117847	32169768	32118251	32167794	71	32117847,32119199,32119467,32120392,32120914,32122000,32122633,32124088,32124514,32126185,32126666,32127014,32127260,32127934,32128187,32130772,32131183,32131482,32131637,32133175,32133765,32134402,32136202,32137215,32138016,32138196,32138324,32140607,32140858,32145232,32145404,32145642,32146505,32146623,32148534,32148794,32148934,32149307,32149550,32149709,32150123,32150421,32151239,32151691,321…	32118454,32119277,32119644,32120459,32121103,32122045,32122669,32124178,32124565,32126239,32126720,32127059,32127305,32127988,32128259,32130835,32131219,32131536,32131682,32133229,32133819,32134456,32136247,32137260,32138103,32138238,32138441,32140640,32140912,32145286,32145452,32145702,32146532,32146668,32148603,32148848,32148970,32149349,32149604,32149832,32150231,32150457,32151371,32151736,321…	5584	COL16A1	collagen, type XVI, alpha 1	122	3.54	0.63	191	6.68	1.19	167	7.11	1.27		1.88889	2.01587
15709	NM_000124	chr10	-	50664490	50747147	50666860	50741010	21	50664490,50668418,50669397,50678227,50679020,50680421,50680954,50681522,50682072,50684260,50686399,50690732,50691391,50701162,50708583,50713929,50732078,50736462,50738765,50740588,50747007,	50667280,50668497,50669602,50678935,50679166,50680516,50681074,50681633,50682288,50684356,50686516,50690909,50691562,50701298,50708742,50714058,50732823,50736571,50738886,50741024,50747147,	7006	ERCC6	excision repair cross-complementing rodent repair deficiency, complementation group 6	2482	72.14	10.29	3878	135.71	19.37	3404	145.09	20.7		1.88241	2.01166
9483	NM_078471,NM_203318	chr17	-	27400527	27507407	27401787	27493958	42	27400527,27409333,27412621,27413455,27413953,27416978,27417549,27417827,27419360,27419872,27420340,27420997,27421667,27421953,27423778,27424240,27424805,27425122,27425373,27425843,27426651,27430616,27434097,27436875,27437453,27438441,27438739,27441028,27441924,27442368,27442681,27443461,27445062,27445394,27446352,27447633,27448015,27448564,27448868,27449183,27492959,27507330,	27401932,27409456,27412666,27413595,27414139,27417116,27417633,27417944,27419474,27420019,27420445,27421108,27421868,27422077,27423933,27424368,27424917,27425242,27425463,27425987,27426780,27430682,27434207,27437119,27437640,27438601,27438881,27441115,27442117,27442459,27442858,27443473,27445207,27445458,27446453,27447776,27448229,27448741,27448975,27449271,27494039,27507407,	7583	MYO18A	myosin XVIIIA	5066	147.26	19.41	7864	275.2	36.29	6604	281.5	37.12		1.86965	1.91242
22535	NR_033969	chr10	-	96039046	96046827	96046827	96046827	4	96039046,96040350,96043143,96046597,	96040088,96040386,96043243,96046827,	1408	LOC100128054	uncharacterized LOC100128054	111	3.22	2.28	172	6.01	4.26	118	5.02	3.56		1.86842	1.5614
599	NM_001163446,NM_016352	chr7	+	129932973	129964020	129933020	129962516	11	129932973,129938585,129939109,129940655,129944317,129945655,129946626,129948146,129950626,129951877,129962328,	129933088,129938667,129939244,129940754,129944419,129945760,129946737,129948237,129950826,129951962,129964020,	2817	CPA4	carboxypeptidase A4	3652	106.15	37.68	5662	198.14	70.33	4882	208.1	73.87		1.86651	1.96046
14635	NM_018660	chr8	-	28203101	28243977	28206235	28218641	10	28203101,28206641,28207580,28209011,28210089,28210689,28214186,28217108,28218401,28243909,	28206347,28206745,28207673,28209324,28210190,28210925,28214296,28217341,28218699,28243977,	4802	ZNF395	zinc finger protein 395	960	27.9	5.81	1489	52.1	10.84	1312	55.92	11.64		1.86575	2.00344
10501	NM_181501	chr5	+	52084135	52249485	52084187	52248281	29	52084135,52145198,52157280,52160596,52160804,52161523,52177704,52183646,52189505,52193285,52194068,52201592,52204727,52205991,52211293,52214561,52216161,52218606,52221107,52223413,52225454,52227876,52229723,52233230,52235419,52235669,52240772,52243174,52248236,	52084248,52145319,52157393,52160685,52160916,52161651,52177853,52183797,52189671,52193359,52194213,52201738,52204871,52206249,52211424,52214728,52216298,52218717,52221317,52223494,52225531,52227966,52229826,52233344,52235521,52235774,52240865,52243291,52249485,	4796	ITGA1	integrin, alpha 1	318	9.24	1.92	490	17.14	3.57	419	17.86	3.72		1.85938	1.9375
14807	NM_003679	chr1	+	241695433	241758949	241695744	241755455	15	241695433,241712128,241712976,241714254,241718911,241723964,241725466,241728286,241729790,241731799,241749980,241752049,241753313,241753505,241755254,	241695798,241712198,241713074,241714344,241718960,241724052,241725632,241728358,241729912,241731947,241750038,241752132,241753415,241753565,241758949,	5266	KMO	kynurenine 3-monooxygenase (kynurenine 3-hydroxylase)	481	13.98	2.65	741	25.93	4.92	631	26.89	5.1		1.8566	1.92453
13774	NM_001004051,NM_001184874,NM_001184875,NM_001184876,NM_138437	chrX	+	101967103	101972661	101969797	101972314	5	101967103,101968018,101968709,101969116,101969336,	101967480,101968145,101968777,101969194,101972661,	3975	GPRASP2	G protein-coupled receptor associated sorting protein 2	436	12.67	3.18	669	23.41	5.88	535	22.8	5.73		1.84906	1.80189
5878	NM_170753	chr10	-	50723150	50732359	50723378	50725160	2	50723150,50732078,	50725167,50732359,	2298	PGBD3	piggyBac transposable element derived 3	803	23.34	10.15	1226	42.9	18.66	1096	46.71	20.32		1.83842	2.00197
17654	NM_053279	chr8	-	11278972	11324276	11281881	11301920	3	11278972,11301539,11324134,	11282145,11302317,11324276,	4093	FAM167A	family with sequence similarity 167, member A	1099	31.94	7.8	1677	58.68	14.33	1730	73.74	18.01		1.83718	2.30897
16700	NM_001166133,NM_025074	chr4	+	78978723	79465423	78979163	79462278	74	78978723,78987138,79158663,79166386,79173545,79176395,79186178,79187987,79188394,79199808,79202551,79203973,79205558,79207558,79229219,79236747,79238521,79239963,79254425,79258827,79284666,79285061,79290991,79293871,79295264,79296892,79300879,79305212,79308528,79321887,79328816,79334122,79340102,79343016,79345541,79350248,79351445,79353510,79359723,79360055,79362315,79366675,79367880,79369206,793…	78979239,78987170,79158771,79166479,79173705,79176529,79186262,79188089,79188586,79199898,79202587,79204121,79205702,79207693,79229363,79236888,79238662,79240140,79254566,79258971,79284819,79285208,79291138,79294012,79295405,79297033,79301150,79305297,79308855,79322041,79328995,79334239,79340217,79343154,79345574,79350380,79351571,79353758,79359872,79360218,79362451,79367787,79368034,79369470,793…	16545	FRAS1	Fraser syndrome 1	609	17.7	1.06	921	32.23	1.94	875	37.29	2.25		1.83019	2.12264
6370	NM_032709	chr10	-	100143321	100174978	100143554	100174892	16	100143321,100144703,100146957,100148110,100150354,100150766,100152188,100152698,100154952,100155147,100157101,100159858,100167338,100167660,100170695,100174765,	100143625,100144824,100147064,100148265,100150511,100150839,100152323,100152840,100155050,100155209,100157255,100160014,100167412,100167754,100170715,100174978,	2065	PYROXD2	pyridine nucleotide-disulphide oxidoreductase domain 2	411	11.94	5.78	624	21.83	10.57	465	19.82	9.59		1.82872	1.65917
6250	NM_014011,NM_144949	chr2	+	46926098	46989927	46985669	46987280	3	46926098,46926348,46985657,	46926250,46926588,46989927,	4662	SOCS5	suppressor of cytokine signaling 5	1044	30.34	6.5	1584	55.43	11.88	1229	52.38	11.23		1.82769	1.72769
6703	NM_001144996,NM_001144997,NM_002206	chr12	-	56078353	56106089	56078841	56106053	29	56078353,56081754,56081985,56082627,56086627,56086924,56087804,56088039,56088226,56088398,56088561,56089305,56090066,56090682,56090999,56091234,56091478,56091721,56092166,56092493,56093653,56094045,56094682,56095162,56096655,56096834,56101260,56105846,56106040,	56079072,56081880,56082084,56082741,56086759,56087101,56087907,56088114,56088306,56088479,56088754,56089421,56090216,56090852,56091061,56091330,56091606,56091810,56092360,56092701,56093773,56094177,56094938,56095200,56096735,56096962,56101686,56105918,56106089,	4413	ITGA7	integrin, alpha 7	2005	58.28	13.2	3033	106.14	24.05	2616	111.51	25.26		1.82197	1.91364
918	NM_022648	chr2	-	218664511	218808796	218669181	218762688	33	218664511,218672797,218673325,218674545,218674970,218677090,218677937,218678407,218679634,218682412,218686462,218694566,218695089,218696177,218699813,218700737,218712232,218745620,218747068,218749757,218750466,218750766,218751256,218755684,218757670,218758161,218759728,218762520,218765185,218771057,218771932,218784917,218808587,	218669326,218672830,218673394,218674714,218675042,218677168,218678030,218678539,218679721,218683482,218686661,218694605,218695113,218696270,218699889,218700934,218713810,218745737,218747134,218749887,218750542,218750827,218751369,218755768,218757735,218758284,218759779,218762692,218765235,218771108,218771974,218784959,218808796,	10276	TNS1	tensin 1	2021	58.74	5.71	3056	106.94	10.4	2350	100.17	9.74		1.82137	1.70578
15010	NM_016142	chr11	+	43702142	43878169	43702377	43876798	11	43702142,43772460,43775595,43819869,43836986,43837896,43852525,43859866,43861548,43876264,43876693,	43702537,43772507,43775671,43819977,43837051,43837941,43852560,43859948,43861614,43876414,43878169,	2545	HSD17B12	hydroxysteroid (17-beta) dehydrogenase 12	1194	34.7	13.63	1804	63.13	24.8	1547	65.94	25.9		1.81952	1.90022
3569	NM_001540	chr7	+	75931874	75933614	75932029	75933490	3	75931874,75933118,75933300,	75932393,75933182,75933614,	897	HSPB1	heat shock 27kDa protein 1	6438	187.14	208.62	9693	339.2	378.14	8629	367.82	410.05		1.81258	1.96554
17482	NM_001161354,NM_020904	chr19	-	49340353	49371884	49340545	49370877	20	49340353,49341273,49342461,49344405,49348626,49348773,49351156,49355484,49356938,49357263,49357473,49360678,49362116,49362725,49363606,49364657,49364876,49368759,49370793,49371339,	49340808,49341386,49342520,49344567,49348703,49348873,49351297,49355583,49357088,49357344,49357521,49360753,49362396,49362941,49363716,49364758,49364949,49368867,49370883,49371884,	3083	PLEKHA4	pleckstrin homology domain containing, family A (phosphoinositide binding specific) member 4	104	3.02	0.97	154	5.38	1.74	144	6.13	1.98		1.79381	2.04124
472	NM_002609	chr5	-	149493401	149535422	149495325	149516610	23	149493401,149497180,149498309,149499029,149499574,149500450,149500766,149501442,149502604,149503812,149504289,149505007,149506082,149509319,149510101,149511541,149512312,149513148,149513443,149514312,149515117,149516570,149534959,	149495509,149497413,149498415,149499129,149499686,149500573,149500885,149501603,149502764,149503923,149504394,149505140,149506177,149509531,149510225,149511657,149512505,149513323,149513571,149514579,149515441,149516616,149535422,	5714	PDGFRB	platelet-derived growth factor receptor, beta polypeptide	1315	38.22	6.68	1949	68.2	11.93	2008	85.59	14.97		1.78593	2.24102
24660	NR_003132	chr4	+	13335036	13339925	13339925	13339925	1	13335036,	13339925,	4889	HSP90AB2P	heat shock protein 90kDa alpha (cytosolic), class B member 2, pseudogene	1257	36.53	7.47	1862	65.16	13.32	1281	54.6	11.16		1.78313	1.49398
14531	NM_000959,NM_001039585	chr1	+	78956727	79006386	78958428	79002372	4	78956727,78958356,78963558,79002090,	78956921,78959226,78963629,79006386,	5431	PTGFR	prostaglandin F receptor (FP)	206	5.98	1.1	304	10.63	1.95	287	12.23	2.25		1.77273	2.04545
16827	NM_001003407,NM_001003408,NM_002313,NM_006720	chr10	-	116190868	116444414	116196018	116444112	25	116190868,116197602,116198934,116200770,116201480,116203787,116205070,116207638,116211382,116213137,116225456,116227939,116232735,116233637,116245055,116247716,116251549,116286418,116304763,116307408,116331055,116335174,116361585,116417715,116444048,	116196132,116197683,116199012,116200836,116201545,116203893,116205162,116207779,116211430,116213242,116225586,116227975,116232891,116233715,116245139,116247775,116251637,116286685,116304857,116307535,116331165,116335358,116361720,116418058,116444414,	8303	ABLIM1	actin binding LIM protein 1	2011	58.45	7.03	2952	103.3	12.44	2725	116.15	13.98		1.76956	1.98862
5590	NM_001199818	chrX	+	101854275	101972661	101969797	101972314	7	101854275,101854633,101856391,101860409,101968709,101969116,101969464,	101854500,101854787,101856437,101860581,101968777,101969194,101972661,	3940	ARMCX5-GPRASP2	ARMCX5-GPRASP2 readthrough	464	13.48	3.42	682	23.86	6.05	549	23.4	5.93		1.76901	1.73392
6248	NM_015852	chr7	-	64434829	64451414	64438496	64441798	4	64434829,64441764,64442361,64450324,	64439914,64441860,64442494,64451414,	6404	ZNF117	zinc finger protein 117	183	5.31	0.82	267	9.34	1.45	229	9.76	1.52		1.76829	1.85366
74	NM_001003818,NM_001198644,NM_001198645,NM_058166	chr11	+	5617330	5634188	5618127	5632572	9	5617330,5617864,5624475,5625763,5626566,5629601,5631374,5631764,5632006,	5617411,5618144,5624965,5625859,5626797,5629624,5631475,5631791,5634188,	3511	TRIM6	tripartite motif containing 6	418	12.15	3.46	614	21.48	6.11	486	20.71	5.89		1.7659	1.70231
15948	NM_001105244,NM_002845	chr18	+	7567313	8406859	7567816	8406160	33	7567313,7774146,7888103,7906502,7926565,7949178,7955118,8069683,8076452,8085668,8088746,8113483,8114788,8143644,8244055,8247842,8248147,8252485,8253224,8296365,8314778,8319175,8343420,8370887,8376043,8376459,8378262,8379164,8380293,8384558,8387069,8394473,8406106,	7567889,7774269,7888375,7906581,7926681,7949353,7955412,8069992,8076562,8085870,8088849,8113757,8114825,8143777,8244207,8247917,8248174,8252497,8253412,8296453,8314855,8319212,8343518,8371004,8376198,8376595,8378412,8379338,8380425,8384684,8387233,8394609,8406859,	5600	PTPRM	protein tyrosine phosphatase, receptor type, M	1854	53.89	9.62	2718	95.11	16.98	2329	99.27	17.72		1.76507	1.842
4043	NM_012301	chr7	-	77646373	79082890	77648631	79082636	22	77646373,77708263,77755010,77756513,77762205,77764337,77789341,77797232,77807327,77814945,77824190,77830478,77885259,77973094,77975238,77998472,78119077,78130893,78150746,78256435,78636405,79082335,	77649293,77708402,77755154,77756733,77762377,77764523,77789590,77797425,77807419,77814987,77824380,77830510,77885898,77973277,77975360,77998530,78119157,78131104,78150962,78256555,78636522,79082890,	6880	MAGI2	membrane associated guanylate kinase, WW and PDZ domain containing 2	119	3.45	0.5	175	6.12	0.88	166	7.07	1.02		1.76	2.04
2311	NM_002727	chr10	+	70847827	70864567	70847913	70863876	3	70847827,70856839,70863626,	70847992,70856987,70864567,	1254	SRGN	serglycin	3271	95.08	75.82	4781	167.31	133.42	3960	168.79	134.6		1.75969	1.77526
11408	NM_001109977	chr4	+	152330397	152584784	152487411	152583906	14	152330397,152375852,152403675,152487289,152498601,152507792,152509991,152550853,152559828,152567709,152570610,152577383,152577911,152583652,	152330617,152375960,152403800,152487516,152499228,152507951,152510078,152551021,152559908,152567900,152571744,152577562,152578050,152584784,	4576	FAM160A1	family with sequence similarity 160, member A1	202	5.87	1.28	295	10.32	2.25	257	10.95	2.39		1.75781	1.86719
14666	NM_018689	chr15	+	81071711	81243999	81166220	81241265	29	81071711,81166204,81171061,81172056,81173240,81176515,81180034,81181041,81181811,81187330,81188209,81199003,81201437,81212434,81213372,81214349,81216961,81217964,81221242,81221359,81224199,81225585,81229014,81230134,81234189,81234591,81235285,81239305,81241137,	81071955,81166314,81171208,81172195,81173477,81176695,81180105,81181137,81181933,81187463,81188401,81199179,81201647,81212640,81213442,81214478,81217047,81218096,81221278,81221515,81224380,81225801,81229226,81230320,81234394,81234678,81235443,81239406,81243999,	7080	KIAA1199	KIAA1199	484	14.06	1.98	706	24.7	3.48	705	30.05	4.24		1.75758	2.14141
5593	NM_001130415,NM_030817	chr12	+	12878850	12944399	12878934	12940586	3	12878850,12938540,12939842,	12879030,12938628,12944399,	4825	APOLD1	apolipoprotein L domain containing 1	998	29.01	6.01	1455	50.91	10.55	1157	49.31	10.21		1.75541	1.69884
8437	NM_001002810,NM_001002811,NM_001002812,NM_001195260,NM_001195261,NM_001198832,NM_001198834,NM_014644,NM_022359	chr1	-	144851423	145076186	144852353	145075862	51	144851423,144854164,144854517,144855739,144856815,144857611,144859758,144863317,144864134,144865809,144866591,144867920,144871695,144873876,144874680,144875976,144877035,144879034,144880741,144881429,144882445,144886096,144890590,144892500,144903076,144904624,144906058,144906420,144909868,144911881,144912129,144915444,144916569,144917498,144917818,144918832,144921834,144922186,144922518,144923689…	144852499,144854211,144854656,144855883,144857042,144857728,144859998,144863442,144864324,144865929,144866723,144868172,144871881,144874029,144874904,144876028,144877271,144879563,144880861,144881622,144882881,144886329,144892219,144892589,144903204,144904737,144906196,144906537,144909960,144911963,144912294,144915639,144916749,144917636,144917932,144918991,144922047,144922279,144922638,144923821…	13141	PDE4DIP	phosphodiesterase 4D interacting protein	3064	89.06	6.77	4457	155.97	11.86	3591	153.07	11.64		1.75185	1.71935
10744	NM_001159944,NM_145245	chr19	+	7895160	7929862	7911428	7928588	20	7895160,7911381,7912617,7913806,7914141,7914882,7916319,7916566,7917971,7918158,7920900,7921977,7923076,7925446,7926763,7927007,7927273,7927857,7928070,7928309,	7895267,7911565,7912807,7914031,7914216,7915008,7916463,7916656,7918069,7918219,7920954,7922010,7923217,7925575,7926904,7927163,7927420,7927953,7928166,7929862,	3846	EVI5L	ecotropic viral integration site 5-like	622	18.08	4.7	904	31.63	8.22	903	38.49	10		1.74894	2.12766
9192	NM_012342	chr10	+	28966423	28971868	28966826	28971330	3	28966423,28970186,28970911,	28966902,28970474,28971868,	1724	BAMBI	BMP and activin membrane-bound inhibitor homolog (Xenopus laevis)	130	3.77	2.18	188	6.57	3.81	252	10.74	6.22		1.74771	2.85321
16992	NM_000281	chr10	-	72643266	72648541	72643706	72648290	4	72643266,72644908,72645554,72648287,	72643805,72644989,72645686,72648541,	1006	PCBD1	pterin-4 alpha-carbinolamine dehydratase/dimerization cofactor of hepatocyte nuclear factor 1 alpha	747	21.71	21.58	1084	37.93	37.7	883	37.63	37.4		1.74699	1.73309
602	NM_001126060,NM_001164757,NM_014697	chr1	+	162039580	162339813	162039967	162337257	10	162039580,162124194,162257133,162270422,162302806,162313624,162324976,162326749,162332772,162336841,	162040072,162124266,162257226,162270496,162302915,162313766,162325143,162326926,162335359,162339813,	6885	NOS1AP	nitric oxide synthase 1 (neuronal) adaptor protein	252	7.32	1.06	365	12.77	1.85	316	13.46	1.95		1.74528	1.83962
10972	NM_031924	chr6	-	159398265	159421198	159398569	159421008	8	159398265,159399291,159401805,159403516,159404693,159407311,159414870,159420466,	159398880,159399378,159401968,159403720,159404839,159407453,159414958,159421198,	2177	RSPH3	radial spoke 3 homolog (Chlamydomonas)	323	9.38	4.3	467	16.34	7.5	387	16.49	7.57		1.74419	1.76047
1382	NM_014935	chr1	-	204187980	204329044	204192597	204242855	23	204187980,204192589,204197210,204197855,204198064,204199540,204210502,204210812,204213991,204214742,204216492,204217948,204218311,204219673,204226480,204228385,204230433,204234069,204236602,204237335,204242753,204243856,204328821,	204191907,204192713,204197356,204197989,204198232,204199714,204210609,204210942,204214131,204214854,204216588,204218098,204218392,204219742,204226997,204228868,204230576,204234170,204236675,204237440,204242868,204243937,204329044,	7399	PLEKHA6	pleckstrin homology domain containing, family A member 6	427	12.41	1.67	614	21.48	2.9	518	22.08	2.98		1.73653	1.78443
2197	NM_001256213,NM_001256214,NM_152296	chr19	-	42470733	42498428	42471088	42498228	24	42470733,42471400,42471813,42472936,42473586,42474336,42474539,42479780,42480567,42482087,42482302,42482757,42485653,42485873,42486059,42489069,42489457,42490015,42490267,42492087,42492469,42492627,42497544,42498222,	42471117,42471492,42471915,42473067,42473732,42474460,42474694,42479949,42480718,42482224,42482478,42482950,42485788,42485983,42486258,42489338,42489575,42490150,42490381,42492291,42492529,42492753,42497619,42498428,	3711	ATP1A3	ATPase, Na+/K+ transporting, alpha 3 polypeptide	328	9.53	2.56	471	16.48	4.44	335	14.27	3.84		1.73438	1.5
2690	NM_005128	chr21	+	37536838	37666572	37537031	37665869	37	37536838,37537005,37571367,37572628,37581012,37583850,37584271,37586378,37586739,37591669,37595528,37597862,37599983,37602747,37605101,37609559,37610898,37612062,37617345,37619814,37620677,37623459,37626069,37632974,37635843,37636045,37642310,37649318,37650272,37650506,37652582,37653780,37660311,37661053,37661342,37664401,37665617,	37536891,37537169,37571549,37572799,37581202,37583949,37584395,37586488,37586854,37591790,37595648,37597965,37600175,37603432,37605373,37609712,37610999,37612253,37618975,37619926,37620866,37623582,37626207,37633030,37635948,37636112,37642455,37649398,37650382,37650653,37652644,37653909,37660448,37661109,37661504,37664531,37666572,	7679	DOPEY2	dopey family member 2	1877	54.56	7.1	2698	94.41	12.29	2213	94.33	12.28		1.73099	1.72958
18076	NM_012309,NM_133266	chr11	-	70313960	70935808	70318973	70858372	23	70313960,70331418,70335432,70336380,70338439,70346674,70346855,70348310,70348900,70505932,70507700,70544792,70644547,70653106,70666468,70742605,70803466,70805582,70820986,70824338,70829874,70858165,70935742,	70319544,70333825,70335453,70336492,70338570,70346698,70346861,70348391,70349036,70506057,70507923,70544868,70644661,70653276,70666787,70742675,70803635,70805734,70821095,70824410,70830078,70858384,70935808,	10590	SHANK2	SH3 and multiple ankyrin repeat domains 2	839	24.38	2.3	1206	42.2	3.98	834	35.55	3.35		1.73043	1.45652
16407	NM_001130414,NM_005503	chr15	+	29213839	29410516	29346087	29409336	14	29213839,29287955,29346047,29367123,29368257,29385277,29386480,29390692,29393801,29397581,29398809,29400472,29406078,29409264,	29213952,29288009,29347038,29367204,29368294,29385423,29386516,29390779,29393987,29397761,29399022,29400592,29406219,29410516,	3637	APBA2	amyloid beta (A4) precursor protein-binding, family A, member 2	394	11.45	3.14	565	19.77	5.43	520	22.16	6.09		1.7293	1.93949
1247	NM_001007538	chr13	-	26618734	26625198	26620650	26625113	2	26618734,26624779,	26621204,26625198,	2889	SHISA2	shisa homolog 2 (Xenopus laevis)	629	18.28	6.32	902	31.56	10.92	809	34.48	11.93		1.72785	1.88766
13702	NM_006169	chr11	+	114166534	114183238	114167278	114183199	3	114166534,114168672,114182766,	114167432,114168880,114183238,	1578	NNMT	nicotinamide N-methyltransferase	245	7.12	4.51	351	12.28	7.78	311	13.25	8.39		1.72506	1.86031
16767	NM_001097633,NM_001097634,NM_001097635,NM_001097636,NM_001490	chr9	+	79056581	79122332	79117297	79118584	6	79056581,79074067,79074975,79093256,79115548,79117154,	79057231,79074221,79075093,79093446,79115977,79122332,	6719	GCNT1	glucosaminyl (N-acetyl) transferase 1, core 2	844	24.53	3.65	1209	42.3	6.29	984	41.94	6.24		1.72329	1.70959
11481	NM_032148	chr12	-	105197274	105322472	105198929	105322305	10	105197274,105238249,105239620,105255068,105260209,105280070,105282810,105289051,105303432,105321750,	105199115,105238398,105239752,105255148,105260357,105280217,105282955,105289123,105303540,105322472,	3544	SLC41A2	solute carrier family 41, member 2	130	3.77	1.06	185	6.47	1.82	155	6.6	1.86		1.71698	1.75472
4744	NM_006688	chr17	-	43037060	43045644	43037555	43045416	2	43037060,43044819,	43037735,43045644,	1500	C1QL1	complement component 1, q subcomponent-like 1	148	4.3	2.86	210	7.34	4.89	222	9.46	6.3		1.70979	2.2028
4199	NM_147193	chr1	-	53971905	54199877	53972291	54060575	10	53971905,53974792,53975521,53980297,53986306,53990449,53995463,54059780,54065773,54199576,	53972449,53974960,53975700,53980454,53986439,53990560,53995625,54060663,54065951,54199877,	2816	GLIS1	GLIS family zinc finger 1	377	10.95	3.88	534	18.68	6.63	490	20.88	7.41		1.70876	1.90979
2009	NM_002373	chr15	+	43809805	43823818	43813671	43822422	6	43809805,43812838,43813169,43813521,43821847,43822266,	43809898,43812921,43813310,43821706,43822068,43823818,	10275	MAP1A	microtubule-associated protein 1A	8471	246.24	23.96	12014	420.43	40.91	9432	402.05	39.12		1.70743	1.63272
16202	NM_014668,NM_033090,NM_148903	chr2	+	11674241	11782912	11696740	11780580	37	11674241,11680079,11682850,11696579,11702588,11706605,11716478,11718422,11720829,11725286,11725887,11727507,11728871,11731521,11732901,11735376,11736236,11737906,11738805,11740925,11742531,11750813,11752620,11755216,11756756,11758413,11761030,11765279,11767087,11770073,11772034,11773014,11774256,11775395,11777841,11778796,11780416,	11674380,11680234,11682943,11696897,11702708,11706782,11716661,11718557,11720958,11725400,11726031,11728355,11729057,11732272,11733252,11735505,11736365,11738104,11738986,11741121,11742668,11751153,11752736,11755416,11756846,11759045,11761133,11765438,11767230,11770235,11772239,11773189,11774475,11775531,11778042,11778935,11782912,	10329	GREB1	growth regulation by estrogen in breast cancer 1	134	3.89	0.37	188	6.57	0.63	182	7.75	0.75		1.7027	2.02703
16478	NM_000674,NM_001048230	chr1	+	203096835	203136533	203097969	203135028	4	203096835,203097405,203097912,203134388,	203097056,203097560,203098310,203136533,	2919	ADORA1	adenosine A1 receptor	226	6.56	2.24	318	11.12	3.8	249	10.61	3.63		1.69643	1.62054
9396	NM_003062	chr5	-	168093070	168728133	168093458	168727713	36	168093070,168096787,168098202,168100181,168110970,168112691,168113983,168119611,168123296,168127586,168134980,168137899,168139287,168149260,168149937,168151420,168175306,168176476,168179959,168180868,168187866,168189543,168199785,168201239,168212911,168216564,168222511,168233450,168244304,168250264,168271588,168310269,168620482,168671708,168678391,168727516,	168093694,168096996,168098488,168100336,168111101,168112932,168114121,168119705,168123436,168127684,168135105,168138063,168139359,168149332,168150009,168151489,168175439,168176640,168180103,168181012,168187941,168189694,168199949,168201383,168212983,168216636,168222583,168233592,168244468,168250336,168271660,168310341,168620554,168671780,168678463,168728133,	5380	SLIT3	slit homolog 3 (Drosophila)	523	15.2	2.82	734	25.68	4.77	817	34.82	6.47		1.69149	2.29433
2644	NM_005529	chr1	-	22148736	22263750	22149808	22263710	97	22148736,22150108,22150613,22150798,22151029,22151196,22154355,22154522,22154747,22155327,22155875,22156485,22157474,22157707,22157955,22158144,22158987,22159760,22159959,22160308,22161171,22162032,22163294,22165317,22165863,22166314,22167593,22168031,22168494,22168731,22169262,22169789,22170640,22172600,22172940,22173846,22174181,22174450,22175135,22175385,22176533,22176855,22178038,22178283,221…	22149981,22150212,22150697,22150869,22151108,22151272,22154412,22154645,22154919,22155572,22156097,22156584,22157583,22157817,22158055,22158289,22159099,22159877,22160107,22160418,22161438,22162130,22163499,22165578,22166043,22166510,22167778,22168166,22168635,22168873,22169414,22169931,22170792,22172748,22173092,22173985,22174333,22174586,22175287,22175524,22176685,22176991,22178190,22178419,221…	14288	HSPG2	heparan sulfate proteoglycan 2	3184	92.55	6.47	4465	156.25	10.93	5011	213.59	14.94		1.68934	2.30912
14844	NM_014467	chrX	+	99899162	99926296	99901319	99925984	11	99899162,99901189,99905781,99917172,99919770,99920239,99920532,99921750,99922270,99924244,99925803,	99899512,99901401,99905862,99917364,99919947,99920366,99920654,99921930,99922404,99924366,99926296,	2190	SRPX2	sushi-repeat containing protein, X-linked 2	373	10.84	4.94	520	18.19	8.3	492	20.97	9.57		1.68016	1.93725
1823	NM_014243	chr4	-	73146685	73434516	73148852	73434479	22	73146685,73154467,73156571,73161370,73163993,73169633,73171703,73175113,73176764,73178007,73179393,73181574,73184288,73185048,73185574,73186430,73188730,73205210,73280531,73414194,73433090,73434410,	73149421,73154585,73156779,73161503,73164159,73169797,73171784,73175237,73176898,73178183,73179539,73181688,73184421,73185192,73185680,73186587,73188814,73205410,73280688,73414601,73433118,73434516,	5822	ADAMTS3	ADAM metallopeptidase with thrombospondin type 1 motif, 3	180	5.23	0.89	249	8.71	1.49	184	7.84	1.34		1.67416	1.50562
9390	NM_144964	chr9	+	37753801	37778969	37761928	37777704	9	37753801,37761899,37762573,37763625,37768072,37769937,37770668,37776278,37777597,	37753849,37762114,37762682,37763750,37768225,37770016,37770736,37776402,37778969,	2293	RG9MTD3	RNA (guanine-9-) methyltransferase domain containing 3	182	5.29	2.3	253	8.85	3.85	185	7.88	3.43		1.67391	1.4913
15144	NM_152527	chr2	-	230899689	230933715	230902095	230924068	5	230899689,230910460,230914476,230923809,230933270,	230902247,230911438,230914620,230924082,230933715,	4398	SLC16A14	solute carrier family 16, member 14 (monocarboxylic acid transporter 14)	762	22.15	5.03	1055	36.91	8.39	1179	50.25	11.42		1.66799	2.27038
2926	NM_030797	chr2	-	16730729	16847134	16734203	16769387	12	16730729,16736336,16740727,16742257,16742428,16742723,16743272,16745256,16746913,16769317,16805131,16847047,	16734267,16736407,16740854,16742337,16742545,16742801,16743409,16745362,16747035,16769397,16805287,16847134,	4699	FAM49A	family with sequence similarity 49, member A	413	12	2.55	572	20.01	4.25	448	19.09	4.06		1.66667	1.59216
4401	NM_004113,NM_021032	chr3	-	191857181	192445388	191861797	192444982	7	191857181,191888246,192053149,192078216,192125813,192444969,192445272,	191861916,191888445,192053253,192078327,192126838,192445112,192445388,	6433	FGF12	fibroblast growth factor 12	271	7.87	1.22	372	13.01	2.02	321	13.68	2.12		1.65574	1.7377
4226	NM_001005242,NM_004572	chr12	-	32943679	33049780	32945357	33049665	14	32943679,32945577,32949042,32955336,32974289,32975400,32976978,32993961,32996115,33003699,33021860,33030779,33031853,33049442,	32945426,32945665,32949232,32955490,32974463,32975565,32977096,32994139,32996247,33003907,33021996,33031477,33031966,33049780,	4439	PKP2	plakophilin 2	1884	54.76	12.33	2584	90.42	20.36	1882	80.22	18.07		1.65126	1.46553
12757	NM_025185	chr17	+	61086897	61505067	61086920	61499316	25	61086897,61151303,61176535,61271351,61278131,61315174,61345108,61391748,61396317,61417461,61428610,61432143,61457078,61465995,61466668,61473103,61476181,61482482,61483514,61488871,61489358,61490903,61492888,61495667,61497359,	61086987,61151375,61176607,61271500,61278318,61315438,61345234,61392030,61396451,61417693,61428777,61432751,61457187,61466118,61466905,61473289,61476275,61482616,61483638,61489047,61489491,61490995,61493035,61495768,61505067,	11747	TANC2	tetratricopeptide repeat, ankyrin repeat and coiled-coil containing 2	524	15.23	1.29	717	25.09	2.13	601	25.61	2.18		1.65116	1.68992
4769	NM_016206	chr3	-	86987122	87040257	86996173	87039893	4	86987122,87017739,87027675,87039767,	86996217,87018273,87027952,87040257,	10396	VGLL3	vestigial like 3 (Drosophila)	1309	38.05	3.66	1793	62.74	6.03	1597	68.07	6.54		1.64754	1.78689
14864	NM_033449	chr5	-	141018868	141030986	141021064	141030935	20	141018868,141021268,141022567,141023784,141024139,141024425,141024586,141025337,141025653,141026169,141026701,141026964,141027534,141028523,141028738,141028961,141029453,141029925,141030586,141030914,	141021130,141021324,141022655,141024005,141024257,141024509,141024715,141025499,141025758,141026289,141026797,141027087,141027663,141028587,141028875,141029103,141029521,141029971,141030684,141030986,	4320	FCHSD1	FCH and double SH3 domains 1	534	15.52	3.59	730	25.54	5.91	604	25.74	5.95		1.64624	1.65738
17680	NM_001135608,NM_015071	chr5	+	142150291	142608572	142150326	142602011	23	142150291,142252964,142254674,142258938,142264862,142273802,142281499,142283104,142287268,142292763,142311611,142393644,142416760,142421380,142434003,142435592,142437206,142500552,142513531,142526795,142586762,142593561,142601922,	142150480,142253060,142254736,142259010,142264964,142273913,142281604,142283234,142287369,142292858,142311690,142393681,142416826,142421455,142434091,142435651,142437312,142500712,142513670,142526946,142587038,142593653,142608572,	9041	ARHGAP26	Rho GTPase activating protein 26	628	18.25	2.01	854	29.88	3.3	827	35.25	3.89		1.64179	1.93532
1881	NM_004740	chr17	-	27400538	27402627	27400869	27401217	1	27400538,	27402627,	2089	TIAF1	TGFB1-induced anti-apoptotic factor 1	888	25.81	12.35	1206	42.2	20.2	1055	44.97	21.52		1.63563	1.74251
52	NM_001143682,NM_020898	chr12	-	54104901	54121307	54105727	54119026	15	54104901,54106883,54107484,54107916,54108381,54108983,54109576,54110043,54113522,54115250,54115808,54117376,54118428,54118870,54121187,	54105905,54106990,54107684,54108025,54108477,54109109,54109831,54110199,54113613,54115399,54115967,54117567,54118531,54119050,54121307,	3046	CALCOCO1	calcium binding and coiled-coil domain 1	692	20.11	6.6	940	32.89	10.79	849	36.18	11.87		1.63485	1.79848
18510	NM_138340	chr18	-	19230857	19284766	19231551	19284626	9	19230857,19236821,19237064,19239130,19244078,19263880,19282276,19283544,19284464,	19231724,19236987,19237113,19239304,19244191,19263926,19282459,19283708,19284766,	2064	ABHD3	abhydrolase domain containing 3	200	5.81	2.81	271	9.48	4.59	209	8.9	4.31		1.63345	1.53381
5151	NM_001144073,NM_012124	chr11	-	89933596	89956532	89935572	89956122	11	89933596,89935980,89936475,89938627,89939369,89943703,89944382,89947185,89948341,89951302,89956058,	89935719,89936043,89936595,89938733,89939440,89943762,89944486,89947343,89948398,89951352,89956532,	3385	CHORDC1	cysteine and histidine-rich domain (CHORD) containing 1	1071	31.13	9.19	1451	50.77	14.99	1195	50.93	15.04		1.63112	1.63656
15109	NM_017780	chr8	+	61591323	61780586	61653991	61778492	38	61591323,61653817,61693558,61707544,61712946,61714086,61720775,61728945,61732565,61734348,61734582,61735061,61736398,61741221,61742880,61748631,61749375,61750226,61750634,61754202,61754405,61757422,61757808,61761073,61761609,61763051,61763590,61763820,61764577,61765056,61765387,61766921,61768533,61769003,61773462,61774754,61775106,61777574,	61591641,61655656,61693989,61707686,61713084,61714152,61720831,61729060,61732649,61734486,61734704,61735305,61736575,61741365,61743136,61748842,61749571,61750394,61750814,61754313,61754611,61757622,61757968,61761163,61761713,61763181,61763663,61763878,61764806,61765265,61766059,61767082,61768761,61769447,61773684,61774895,61775211,61780586,	11580	CHD7	chromodomain helicase DNA binding protein 7	453	13.16	1.13	609	21.31	1.84	608	25.91	2.23		1.62832	1.97345
9030	NM_001142474,NM_001142475,NM_001142476,NM_001142477,NM_001142478,NM_001142479,NM_001142480,NM_001142481,NM_001142482,NM_001142483,NM_004772	chr5	-	111064999	111312628	111066617	111312436	9	111064999,111071126,111091466,111092832,111093016,111093258,111093628,111310970,111312406,	111066743,111071204,111091948,111092945,111093252,111093399,111093915,111311075,111312628,	3408	NREP	neuronal regeneration related protein homolog (rat)	1598	46.45	13.62	2158	75.51	22.15	1705	72.67	21.32		1.62628	1.56535
2558	NM_025135	chr18	+	33877701	34360018	33877798	34359493	25	33877701,33935501,33952642,34081894,34092400,34156413,34174749,34182636,34191914,34205473,34238037,34261398,34267090,34273171,34289057,34297794,34310608,34320618,34322699,34323994,34326907,34335081,34340570,34349227,34359410,	33877963,33935608,33952707,34081962,34092506,34156508,34174861,34182731,34192058,34205712,34238151,34261533,34267141,34273386,34289354,34298678,34310767,34320801,34322819,34324156,34327098,34335274,34340745,34349389,34360018,	4942	FHOD3	formin homology 2 domain containing 3	1798	52.26	10.57	2420	84.68	17.13	2131	90.83	18.37		1.62062	1.73794
17389	NM_007034	chr1	+	78470635	78482995	78470794	78481931	3	78470635,78478734,78481697,	78471005,78479303,78482995,	2237	DNAJB4	DnaJ (Hsp40) homolog, subfamily B, member 4	893	25.95	11.6	1200	41.99	18.77	959	40.87	18.27		1.6181	1.575
944	NM_014322	chr1	-	241756451	241803701	241757729	241803556	4	241756451,241761047,241767561,241803183,	241757993,241761299,241767881,241803701,	2632	OPN3	opsin 3	820	23.83	9.05	1101	38.52	14.63	1004	42.79	16.25		1.61657	1.79558
6290	NM_001173476,NM_005876	chr2	+	220299699	220358354	220299699	220357508	43	220299699,220309374,220309546,220312695,220315857,220316346,220325533,220326603,220327019,220329154,220330778,220331895,220333299,220333580,220333877,220336589,220336948,220337611,220338225,220338449,220341591,220341998,220342410,220342626,220343865,220344504,220344683,220345392,220346025,220346359,220347505,220347819,220350067,220352915,220353219,220353499,220353775,220354057,220355130,220355454…	220300087,220309464,220309883,220313993,220316001,220316529,220325718,220326779,220327108,220329330,220331584,220332156,220333458,220333770,220334101,220336709,220337053,220337818,220338349,220338625,220341704,220342167,220342507,220342827,220343923,220344582,220344862,220345419,220346178,220346402,220347574,220349794,220350199,220353032,220353387,220353622,220353943,220354661,220355370,220355678…	11641	SPEG	SPEG complex locus	1544	44.88	3.85	2070	72.43	6.22	1751	74.63	6.41		1.61558	1.66494
6308	NM_000381,NM_001098624,NM_001193277,NM_001193278,NM_001193279,NM_001193280,NM_001193281,NM_033289,NM_033290	chrX	-	10413349	10851809	10417407	10535587	15	10413349,10422909,10427685,10437304,10442662,10450519,10463623,10469446,10473380,10491131,10534927,10544823,10588329,10645504,10851672,	10417756,10423117,10427847,10437880,10442790,10450668,10463731,10469599,10474525,10491227,10535643,10544957,10588674,10645779,10851809,	8739	MID1	midline 1 (Opitz/BBB syndrome)	2137	62.12	7.1	2865	100.26	11.47	2271	96.8	11.07		1.61549	1.55915
17351	NM_001145770,NM_001145771,NM_001145772,NM_001145773,NM_001145774,NM_005682,NM_201524,NM_201525	chr16	+	57653909	57698944	57684199	57697494	17	57653909,57662418,57673206,57675498,57684164,57685096,57687114,57687897,57689310,57689787,57690137,57690425,57691284,57693306,57694679,57695608,57697363,	57654048,57662740,57673582,57675620,57684263,57685534,57687247,57688045,57689442,57689904,57690183,57690529,57691403,57693593,57694788,57695877,57698944,	4541	GPR56	G protein-coupled receptor 56	758	22.03	4.85	1017	35.59	7.83	1155	49.23	10.84		1.61443	2.23505
9595	NM_001135212,NM_181342	chr2	-	179328390	179343355	179330496	179343226	4	179328390,179334378,179341788,179343005,	179330658,179334512,179341940,179343355,	2904	FKBP7	FK506 binding protein 7	405	11.77	4.05	542	18.96	6.52	415	17.68	6.08		1.60988	1.50123
7387	NM_014702	chr6	-	127759550	127780535	127765253	127775126	6	127759550,127767552,127770966,127771134,127774991,127780319,	127765427,127768885,127771046,127771497,127775246,127780535,	8124	KIAA0408	KIAA0408	131	3.8	0.46	174	6.08	0.74	142	6.05	0.74		1.6087	1.6087
22872	NR_024322	chr2	-	234774089	234777055	234777055	234777055	2	234774089,234776972,	234775996,234777055,	1990	MSL3P1	male-specific lethal 3 homolog (Drosophila) pseudogene 1	146	4.24	2.13	195	6.82	3.42	145	6.18	3.1		1.60563	1.4554
1451	NM_001113498,NM_182830	chr14	-	47308827	48144157	47311133	48143999	18	47308827,47314968,47324226,47342635,47343247,47346691,47351246,47389214,47426576,47504213,47530451,47566056,47600916,47613280,47687223,47770613,47812300,48143719,	47311222,47315074,47324357,47342794,47343403,47346712,47351424,47389363,47426846,47504507,47530781,47566326,47601049,47613477,47687398,47770753,47812438,48144157,	5680	MDGA2	MAM domain containing glycosylphosphatidylinositol anchor 2	288	8.37	1.47	384	13.43	2.36	304	12.95	2.27		1.60544	1.54422
2604	NM_001164440	chr5	+	10564434	10657928	10564579	10650225	4	10564434,10618444,10638139,10649377,	10564945,10618574,10638280,10657928,	9333	ANKRD33B	ankyrin repeat domain 33B	123	3.57	0.38	165	5.77	0.61	166	7.07	0.75		1.60526	1.97368
2562	NM_014945	chr5	+	148521053	148639999	148521658	148637967	24	148521053,148521571,148563014,148577781,148579878,148586570,148590288,148596521,148610211,148612791,148617010,148618810,148619321,148620238,148622053,148624443,148626044,148627344,148629377,148630009,148630921,148631763,148632319,148637853,	148521217,148521671,148563152,148577965,148579991,148586697,148590382,148596609,148610270,148612863,148617166,148618840,148619451,148620337,148622101,148624578,148626109,148627492,148629407,148630068,148630982,148631771,148632400,148639999,	4335	ABLIM3	actin binding LIM protein family, member 3	4697	136.53	31.49	6251	218.75	50.46	5341	227.66	52.51		1.60241	1.66751
6977	NM_031453	chr10	-	14560558	14816896	14563188	14816662	5	14560558,14563867,14572330,14709632,14816251,	14563305,14564018,14572514,14709690,14816896,	3785	FAM107B	family with sequence similarity 107, member B	2029	58.98	15.58	2696	94.34	24.92	2039	86.91	22.96		1.59949	1.47368
17037	NM_016170	chr2	+	74741595	74744275	74741933	74743316	3	74741595,74742759,74743099,	74742333,74742997,74744275,	2152	TLX2	T-cell leukemia homeobox 2	105	3.05	1.41	139	4.86	2.25	146	6.22	2.89		1.59574	2.04965
4674	NM_001407	chr3	-	48673895	48700348	48675637	48700067	35	48673895,48677106,48678756,48679283,48679790,48680168,48680399,48680986,48681648,48682148,48682467,48682875,48683174,48683522,48684195,48685273,48685698,48686151,48686553,48687912,48688324,48688791,48689009,48689309,48689869,48690434,48691051,48691310,48691721,48692476,48692738,48693168,48693572,48694130,48696319,	48675665,48677992,48678957,48679442,48679900,48680317,48680516,48681110,48681728,48682261,48682642,48683082,48683301,48683690,48684361,48685429,48685894,48686361,48686648,48688014,48688508,48688912,48689151,48689481,48689986,48690620,48691221,48691436,48691885,48692634,48692827,48693284,48693798,48694781,48700348,	11962	CELSR3	cadherin, EGF LAG seven-pass G-type receptor 3 (flamingo homolog, Drosophila)	389	11.3	0.94	515	18.02	1.5	399	17	1.42		1.59574	1.51064
11594	NM_001143981,NM_001143982,NM_001143983,NM_145234	chrX	-	109917083	110039286	109919458	110035409	12	109917083,109922563,109924709,109931821,109937390,109943881,109963062,109964612,110002888,110005922,110035315,110038913,	109919589,109922653,109924877,109932031,109937559,109943949,109963156,109964758,110002982,110006035,110035443,110039286,	4159	CHRDL1	chordin-like 1	4611	134.03	32.22	6106	213.68	51.37	4902	208.95	50.24		1.59435	1.55928
16443	NM_001085354,NM_024657	chrX	-	106183963	106243474	106184708	106243199	17	106183963,106185167,106185744,106198142,106199709,106200165,106201565,106205241,106219813,106221309,106224120,106224574,106228325,106229212,106236459,106242906,106243097,	106184862,106185451,106186435,106198318,106199764,106200234,106201694,106205340,106219914,106221429,106224249,106224707,106228473,106229430,106236592,106242979,106243474,	3834	MORC4	MORC family CW-type zinc finger 4	1321	38.4	10.01	1747	61.13	15.94	1361	58.01	15.13		1.59241	1.51149
8865	NM_001167667,NM_004934	chr5	-	19473154	19988353	19473334	19839095	13	19473154,19483409,19503100,19520765,19543977,19571687,19591165,19612542,19721455,19747050,19838867,19981168,19988194,	19473825,19483661,19503218,19520887,19544114,19571941,19591353,19612710,19721575,19747345,19839351,19981287,19988353,	3087	CDH18	cadherin 18, type 2	105	3.05	0.98	138	4.82	1.56	128	5.45	1.76		1.59184	1.79592
4427	NM_001193493,NM_003038	chr2	+	65215578	65251000	65216777	65248280	9	65215578,65216494,65228581,65231086,65237730,65243573,65245204,65245678,65248045,	65215754,65217304,65228624,65231149,65237897,65243807,65245399,65245813,65251000,	4778	SLC1A4	solute carrier family 1 (glutamate/neutral amino acid transporter), member 4	335	9.73	2.03	442	15.46	3.23	527	22.46	4.7		1.59113	2.31527
16217	NM_003466,NM_013952,NM_013953,NM_013992	chr2	-	113973573	114036498	113976109	114035971	12	113973573,113977668,113984731,113992970,113994177,113999127,113999584,114000266,114002003,114004330,114035946,114036407,	113976186,113977755,113984833,113993159,113994298,113999303,113999707,114000355,114002201,114004496,114036046,114036498,	4055	PAX8	paired box 8	549	15.95	3.93	725	25.37	6.25	585	24.93	6.14		1.59033	1.56234
4768	NM_001113546,NM_001113547,NM_001243775,NM_016357	chr12	-	50569562	50677353	50570846	50642534	11	50569562,50575686,50586234,50589612,50594559,50598334,50599766,50615803,50625447,50642415,50677202,	50571852,50575820,50586347,50589670,50595316,50598483,50599851,50616488,50625493,50642557,50677353,	4610	LIMA1	LIM domain and actin binding 1	3166	92.03	19.96	4178	146.2	31.71	3430	146.2	31.71		1.58868	1.58868
5742	NM_012111	chr14	+	77924372	77935815	77924532	77935592	9	77924372,77925958,77928502,77928984,77930940,77931881,77934425,77934799,77935419,	77924612,77926149,77928585,77929102,77931029,77932010,77934527,77934851,77935815,	1400	AHSA1	AHA1, activator of heat shock 90kDa protein ATPase homolog 1 (yeast)	4912	142.78	101.98	6480	226.76	161.97	4914	209.46	149.61		1.58825	1.46705
9046	NM_001013693	chr1	+	22138757	22151714	22138944	22148708	5	22138757,22140890,22142435,22147942,22148694,	22139029,22141316,22142567,22148104,22151714,	4012	LDLRAD2	low density lipoprotein receptor class A domain containing 2	372	10.81	2.69	490	17.14	4.27	564	24.04	5.99		1.58736	2.22677
5494	NM_012098	chr9	-	129849627	129885044	129851217	129871010	5	129849627,129853948,129856011,129870193,129884593,	129851417,129854219,129856205,129871059,129885044,	3572	ANGPTL2	angiopoietin-like 2	717	20.84	5.83	945	33.07	9.25	775	33.03	9.24		1.58662	1.58491
18618	NM_080826	chr20	+	13202417	13281297	13202423	13280106	6	13202417,13251150,13260280,13269186,13273020,13279588,	13202561,13251390,13260545,13269330,13273110,13281297,	2592	ISM1	isthmin 1 homolog (zebrafish)	279	8.11	3.12	367	12.84	4.95	355	15.13	5.83		1.58654	1.86859
16595	NM_020859	chr4	+	77356252	77704405	77357205	77700330	11	77356252,77476761,77631308,77651956,77659913,77670169,77675463,77677601,77680697,77691778,77699961,	77357373,77476916,77631440,77652088,77663079,77670243,77676345,77678090,77680848,77692051,77704405,	11019	SHROOM3	shroom family member 3	1768	51.39	4.66	2328	81.46	7.39	2054	87.55	7.94		1.58584	1.70386
8757	NM_001001522,NM_003186	chr11	+	117070039	117075508	117073729	117075075	5	117070039,117073717,117074022,117074497,117074930,	117070545,117073909,117074200,117074600,117075508,	1557	TAGLN	transgelin	5982	173.89	111.68	7879	275.72	177.08	6784	289.17	185.72		1.5856	1.66297
15084	NM_001909	chr11	-	1773981	1785222	1774732	1785089	9	1773981,1775032,1775223,1776135,1778553,1780198,1780745,1782538,1785021,	1774900,1775131,1775368,1776258,1778786,1780317,1780869,1782698,1785222,	2123	CTSD	cathepsin D	22340	649.4	305.88	29422	1029.62	484.98	32683	1393.15	656.21		1.58552	2.14532
56571	AK295906	chr8	-	54427580	54429171	54427580	54429171	1	54427580,	54429171,	1591	LOC100507516	uncharacterized LOC100507516	183	5.31	3.33	240	8.39	5.27	195	8.31	5.22		1.58258	1.56757
1773	NM_000635,NM_134433	chr19	-	5993174	6110664	5994845	6047507	18	5993174,5995611,5997070,6001825,6002731,6004211,6007022,6007700,6008116,6010146,6012996,6016100,6026173,6039990,6042054,6044203,6047417,6110403,	5994961,5995654,5997224,6002034,6002881,6004309,6007177,6007813,6008235,6010262,6013116,6016282,6026248,6040252,6042134,6044293,6047515,6110664,	4112	RFX2	regulatory factor X, 2 (influences HLA class II expression)	122	3.54	0.86	161	5.63	1.36	147	6.26	1.52		1.5814	1.76744
883	NM_000147	chr1	-	24171571	24194859	24172204	24194776	8	24171571,24172563,24175138,24180849,24186287,24189623,24191980,24194387,	24172345,24172663,24175329,24181050,24186393,24189761,24192115,24194859,	2117	FUCA1	fucosidase, alpha-L- 1, tissue	333	9.67	4.56	436	15.25	7.2	460	19.6	9.25		1.57895	2.02851
13591	NM_001164407	chr17	-	1606083	1613662	1611063	1613536	4	1606083,1612792,1613097,1613360,	1611516,1612875,1613180,1613662,	5901	TLCD2	TLC domain containing 2	169	4.91	0.83	222	7.76	1.31	182	7.75	1.31		1.57831	1.57831
3572	NM_001134473,NM_014615	chr16	+	85645028	85709812	85646997	85706145	17	85645028,85646923,85667519,85682157,85687883,85688399,85689331,85689948,85690882,85694751,85696586,85696949,85698620,85699581,85701745,85704600,85706010,	85645137,85647004,85667738,85682357,85688056,85688597,85689523,85690271,85691210,85695371,85696699,85697220,85698734,85699953,85702030,85704704,85709812,	7504	KIAA0182	KIAA0182	796	23.13	3.08	1044	36.53	4.86	1000	42.62	5.67		1.57792	1.84091
2023	NM_024582	chr4	+	126237566	126414087	126237566	126412923	17	126237566,126319938,126328034,126329598,126336038,126337602,126355399,126367453,126369615,126384717,126389666,126397325,126398309,126400895,126402675,126408499,126411055,	126242741,126320070,126328296,126329949,126336961,126337777,126355580,126367698,126373965,126384822,126389974,126397411,126398489,126401020,126402893,126408761,126414087,	16110	FAT4	FAT tumor suppressor homolog 4 (Drosophila)	1800	52.32	3.24	2353	82.34	5.11	2091	89.13	5.53		1.57716	1.70679
2772	NM_001198595,NM_006873	chr2	+	48757307	48825654	48807772	48822441	5	48757307,48757851,48807725,48818791,48822366,	48757355,48757968,48809702,48818994,48825654,	5633	STON1	stonin 1	205	5.95	1.05	267	9.34	1.65	265	11.29	2		1.57143	1.90476
4063	NM_003851	chr1	-	167510250	167523056	167511534	167522978	4	167510250,167515337,167517238,167522624,	167511538,167515522,167517358,167523056,	2025	CREG1	cellular repressor of E1A-stimulated genes 1	113	3.28	1.61	147	5.14	2.53	144	6.13	3.02		1.57143	1.87578
11875	NM_001873	chr4	+	166300096	166419482	166300373	166418762	9	166300096,166385541,166388839,166403393,166405573,166408589,166414322,166416710,166418663,	166300680,166385738,166389007,166403511,166405756,166408729,166414422,166416829,166419482,	2428	CPE	carboxypeptidase E	1121	32.58	13.41	1458	51.02	21.01	1209	51.53	21.22		1.56674	1.5824
15039	NM_014226	chr14	-	102695177	102771531	102695625	102771305	12	102695177,102695793,102698043,102698871,102700024,102717148,102718092,102718253,102729882,102732159,102749814,102771298,	102695703,102695994,102698158,102699045,102700126,102717327,102718141,102718332,102729953,102732249,102749929,102771531,	1934	MOK	MOK protein kinase	947	27.52	14.22	1231	43.07	22.26	1093	46.59	24.08		1.5654	1.69339
9044	NM_000574,NM_001114752	chr1	+	207494816	207534311	207495110	207533014	11	207494816,207495726,207497903,207498966,207500096,207504452,207510037,207510673,207512741,207513735,207532890,	207495210,207495912,207498095,207499066,207500182,207504641,207510163,207510754,207512762,207513853,207534311,	2914	CD55	CD55 molecule, decay accelerating factor for complement (Cromer blood group)	1560	45.34	15.55	2027	70.93	24.34	1763	75.14	25.78		1.56527	1.65788
5330	NM_001039569	chr2	-	224620046	224702319	224623431	224702167	5	224620046,224629929,224640617,224642407,224702164,	224623467,224630067,224640726,224642586,224702319,	4002	AP1S3	adaptor-related protein complex 1, sigma 3 subunit	741	21.54	5.38	964	33.73	8.42	789	33.63	8.4		1.56506	1.56134
13588	NM_003071,NM_139048	chr3	-	148747903	148804341	148750006	148804123	25	148747903,148752704,148756835,148757367,148757817,148759276,148759952,148763866,148765814,148766649,148768018,148773089,148777504,148778429,148778565,148781217,148782577,148786026,148789038,148789369,148791011,148792001,148793667,148802468,148804103,	148750159,148752785,148757016,148757480,148757943,148759455,148760077,148764046,148765950,148766788,148768162,148773187,148777594,148778474,148778645,148781311,148782653,148786122,148789230,148789444,148791109,148792135,148793834,148802676,148804341,	5351	HLTF	helicase-like transcription factor	2397	69.67	13.01	3114	108.97	20.36	2544	108.44	20.26		1.56495	1.55726
8605	NM_018946	chr9	+	100818958	100845365	100819090	100845337	6	100818958,100823063,100839199,100840474,100843097,100845127,	100819222,100823279,100839299,100840629,100843364,100845365,	1240	NANS	N-acetylneuraminic acid synthase	3733	108.51	87.5	4849	169.69	136.84	3775	160.91	129.76		1.56389	1.48297
18573	NM_001242412,NM_020731	chr5	+	304290	438405	304334	434949	12	304290,344007,353844,376724,413458,422843,423955,427751,427921,432577,432920,433967,	304336,344079,354026,376831,413548,422973,424092,427805,428121,432639,433062,438405,	5660	AHRR	aryl-hydrocarbon receptor repressor	873	25.37	4.48	1132	39.61	6.99	970	41.34	7.3		1.56027	1.62946
9961	NM_016422	chr11	-	10533224	10562774	10536462	10555705	6	10533224,10540580,10546738,10552189,10555562,10562668,	10536613,10540688,10546920,10552298,10555752,10562774,	4084	RNF141	ring finger protein 141	1186	34.47	8.44	1536	53.75	13.16	1399	59.63	14.6		1.55924	1.72986
7591	NM_004827	chr4	-	89011415	89080011	89013385	89061147	16	89011415,89015728,89016671,89018604,89020475,89022381,89028335,89034454,89036108,89039260,89042786,89052212,89052954,89053727,89060944,89079537,	89013533,89015811,89016761,89018759,89020600,89022471,89028418,89034705,89036210,89039412,89042944,89052365,89053069,89053787,89061166,89080011,	4431	ABCG2	ATP-binding cassette, sub-family G (WHITE), member 2	119	3.45	0.77	153	5.35	1.2	142	6.05	1.36		1.55844	1.76623
4176	NM_001165979,NM_016341	chr10	+	95753745	96088148	95790803	96084837	34	95753745,95790439,95848829,95891930,95930936,95987062,95993810,95995671,96005702,96012072,96013946,96014649,96018556,96018770,96022250,96025403,96025549,96028685,96030242,96033318,96039538,96043546,96044604,96053264,96058135,96064238,96066183,96068337,96073010,96076303,96081657,96084105,96084648,96087724,	95754015,95792009,95849133,95892216,95931253,95987208,95994069,95995877,96006378,96012255,96014064,96014806,96018679,96018907,96022489,96025465,96025715,96028793,96030359,96033477,96039668,96043668,96044722,96053396,96058426,96064402,96066445,96068456,96073139,96076513,96081816,96084324,96084861,96088148,	8295	PLCE1	phospholipase C, epsilon 1	2543	73.92	8.91	3292	115.2	13.88	2612	111.33	13.42		1.5578	1.50617
8344	NM_006291	chr14	+	103592663	103603776	103592794	103601697	11	103592663,103593341,103596076,103596338,103596651,103597388,103597975,103599086,103599698,103600018,103601555,	103593029,103593966,103596191,103596461,103596752,103597487,103598099,103599209,103599854,103600140,103603776,	4175	TNFAIP2	tumor necrosis factor, alpha-induced protein 2	326	9.47	2.26	421	14.73	3.52	339	14.45	3.46		1.55752	1.53097
8764	NM_001032281,NM_006287	chr2	-	188328957	188419219	188331662	188368495	9	188328957,188332479,188343304,188348850,188349537,188353063,188361607,188368374,188418926,	188331769,188332659,188343530,188348943,188349714,188353102,188361805,188368497,188419219,	4141	TFPI	tissue factor pathway inhibitor (lipoprotein-associated coagulation inhibitor)	5677	165.02	39.85	7310	255.81	61.77	5877	250.51	60.49		1.55006	1.51794
6200	NM_000112	chr5	+	149340299	149366963	149357215	149361376	3	149340299,149357190,149359855,	149340542,149357914,149366963,	8075	SLC26A2	solute carrier family 26 (sulfate transporter), member 2	3117	90.6	11.21	4010	140.33	17.37	3384	144.24	17.86		1.54951	1.59322
7595	NM_013309	chr15	-	45774679	45815002	45777360	45814552	8	45774679,45778808,45779724,45781038,45782925,45803335,45814161,45814804,	45777515,45778943,45779830,45781240,45783079,45803482,45814666,45815002,	4283	SLC30A4	solute carrier family 30 (zinc transporter), member 4	216	6.27	1.46	278	9.72	2.26	232	9.88	2.3		1.54795	1.57534
5745	NM_000833,NM_001134407,NM_001134408	chr16	-	9847264	10276611	9857005	10274268	14	9847264,9862707,9892133,9916120,9923279,9927961,9934503,9934792,9943612,9984842,10031815,10273854,10275733,10276510,	9858805,9862946,9892321,9916281,9923509,9928087,9934657,9934961,9943818,9984957,10032408,10274286,10276263,10276611,	14785	GRIN2A	glutamate receptor, ionotropic, N-methyl D-aspartate 2A	383	11.13	0.75	493	17.25	1.16	458	19.52	1.32		1.54667	1.76
1694	NM_000313	chr3	-	93591880	93692934	93593088	93692593	15	93591880,93595809,93598006,93603571,93605179,93611776,93615419,93617291,93619647,93624627,93624864,93629462,93643083,93646093,93692517,	93593249,93596035,93598158,93603740,93605347,93611966,93615535,93617413,93619773,93624759,93624987,93629549,93643108,93646251,93692934,	3580	PROS1	protein S (alpha)	987	28.69	8.01	1267	44.33	12.38	990	42.19	11.78		1.54557	1.47066
10034	NM_178834	chr11	+	111411232	111431788	111411568	111431183	7	111411232,111414647,111420342,111425285,111425931,111428265,111430819,	111411653,111414945,111420500,111425318,111426015,111428368,111431788,	2066	LAYN	layilin	978	28.42	13.75	1255	43.91	21.25	1023	43.6	21.1		1.54545	1.53455
816	NM_001042355,NM_001042412,NM_015247	chr16	+	50775960	50835846	50783609	50830419	20	50775960,50776672,50778640,50783486,50785514,50788229,50788371,50810085,50811735,50813575,50815156,50816235,50818239,50820765,50821696,50825468,50826507,50827456,50828122,50830234,	50776127,50776752,50778777,50784113,50785817,50788335,50788376,50810188,50811852,50813955,50815322,50816377,50818362,50820857,50821763,50825601,50826616,50827575,50828339,50835846,	8805	CYLD	cylindromatosis (turban tumor syndrome)	2864	83.25	9.45	3672	128.5	14.59	2908	123.95	14.07		1.54392	1.48889
18273	NM_002318	chr8	-	23154409	23261722	23155555	23225864	14	23154409,23156348,23159539,23160794,23167180,23174461,23177397,23179642,23185894,23190913,23198504,23217602,23225509,23261466,	23155635,23156460,23159676,23160910,23167424,23174627,23177565,23179794,23186078,23191136,23198716,23217778,23225947,23261722,	3810	LOXL2	lysyl oxidase-like 2	13280	386.03	101.32	16999	594.88	156.13	15460	659	172.96		1.54096	1.70707
2426	NM_006819	chr11	+	63953586	63972020	63953733	63971598	14	63953586,63960549,63961660,63961950,63963116,63964742,63964964,63965325,63967411,63967640,63970347,63970596,63970921,63971525,	63953742,63960759,63961802,63962092,63963285,63964869,63965067,63965446,63967508,63967765,63970384,63970700,63971094,63972020,	2201	STIP1	stress-induced-phosphoprotein 1	8685	252.46	114.7	11105	388.62	176.56	8740	372.55	169.26		1.53932	1.47568
10398	NM_001102426	chr2	-	101623689	101767846	101624282	101767715	20	101623689,101627390,101627912,101638142,101638742,101643844,101644509,101644764,101645952,101648729,101650005,101652479,101653993,101654922,101656639,101666862,101670569,101675882,101706715,101767588,	101624735,101627488,101628002,101638208,101638983,101643913,101644608,101644894,101646238,101648847,101650220,101652630,101654170,101655117,101656847,101667103,101670798,101676001,101706826,101767846,	4147	TBC1D8	TBC1 domain family, member 8 (with GRAM domain)	133	3.86	0.93	170	5.94	1.43	169	7.2	1.73		1.53763	1.86022
2177	NM_020343	chr20	-	20370271	20693266	20377373	20693123	40	20370271,20377338,20392670,20453472,20475760,20483994,20486054,20491897,20493156,20501560,20505049,20505473,20506895,20512330,20516388,20517299,20527347,20552101,20552491,20553518,20563693,20565508,20569911,20571820,20582325,20585818,20591958,20596686,20599920,20601106,20610006,20616061,20618006,20620428,20621344,20624149,20634173,20656879,20661334,20693017,	20373897,20377378,20392792,20453600,20475919,20484150,20486178,20491969,20493928,20501744,20505187,20505542,20507006,20512439,20516447,20517428,20527476,20552257,20552590,20553712,20563870,20565599,20570009,20571958,20582490,20586056,20592070,20596835,20600058,20601274,20610234,20616261,20618145,20620544,20621522,20624193,20634231,20656932,20661445,20693266,	9426	RALGAPA2	Ral GTPase activating protein, alpha subunit 2 (catalytic)	273	7.93	0.84	348	12.17	1.29	352	15	1.59		1.53571	1.89286
4291	NM_002167	chr1	-	23884420	23886285	23885450	23885917	3	23884420,23885425,23885617,	23884906,23885510,23886285,	1239	ID3	inhibitor of DNA binding 3, dominant negative helix-loop-helix protein	373	10.84	8.74	475	16.62	13.41	898	38.27	30.88		1.53432	3.53318
10157	NM_004163	chr18	+	52495707	52562747	52544816	52556644	6	52495707,52544797,52546599,52551563,52555225,52556454,	52495931,52544969,52546685,52551667,52555349,52562747,	7003	RAB27B	RAB27B, member RAS oncogene family	894	25.98	3.7	1135	39.71	5.67	934	39.81	5.68		1.53243	1.53514
10771	NM_001145128,NM_145025	chr6	-	109814058	110012415	109814571	109996948	41	109814058,109815183,109816540,109818667,109818998,109820246,109827529,109827856,109830381,109835426,109837059,109837632,109850213,109854453,109863249,109867069,109871292,109884799,109885282,109885958,109894644,109900752,109906325,109907118,109931567,109933212,109935385,109935587,109940294,109952899,109954386,109962720,109965816,109977958,109980430,109983753,109993121,109993317,109995400,109996831…	109814774,109815298,109816643,109818766,109819168,109820443,109827750,109828003,109830583,109835640,109837278,109837845,109850276,109854673,109863374,109867330,109871505,109884915,109885483,109886048,109894797,109900829,109906440,109907275,109931716,109933296,109935499,109935683,109940439,109954306,109954526,109962819,109965891,109978087,109980616,109983866,109993218,109993370,109995464,109996959…	7552	AKD1	adenylate kinase domain containing 1	174	5.05	0.66	220	7.69	1.01	171	7.28	0.96		1.5303	1.45455
6579	NM_003749	chr13	-	110406183	110438914	110408650	110438400	2	110406183,110434388,	110408655,110438914,	6998	IRS2	insulin receptor substrate 2	1206	35.05	5	1530	53.54	7.65	1574	67.09	9.58		1.53	1.916
2989	NM_015566	chr5	-	74073398	74162615	74077284	74137501	13	74073398,74078755,74091854,74096704,74097414,74100317,74100980,74109664,74130250,74134789,74135898,74137369,74162575,	74077833,74078959,74092011,74096855,74097454,74100430,74101109,74109844,74130422,74134875,74135998,74137504,74162615,	5942	FAM169A	family with sequence similarity 169, member A	144	4.18	0.7	183	6.4	1.07	158	6.73	1.13		1.52857	1.61429
11791	NM_000956	chr14	+	52781015	52795322	52781266	52794172	2	52781015,52793938,	52782109,52795322,	2478	PTGER2	prostaglandin E receptor 2 (subtype EP2), 53kDa	172	4.99	2.01	218	7.62	3.07	216	9.2	3.71		1.52736	1.84577
12009	NM_001201546,NM_001201547,NM_001201548,NM_001201549,NM_004696	chr1	-	110905472	110933704	110906387	110931945	9	110905472,110918079,110919571,110921474,110923603,110924273,110925455,110931858,110933486,	110906535,110918173,110919783,110921978,110923765,110924417,110925588,110931977,110933704,	2649	SLC16A4	solute carrier family 16, member 4 (monocarboxylic acid transporter 5)	353	10.26	3.87	448	15.67	5.91	492	20.97	7.91		1.52713	2.04393
24442	NR_024360	chr8	-	77523113	77595510	77595510	77595510	4	77523113,77528556,77585061,77595286,	77524262,77528686,77585268,77595510,	1710	LOC100192378	uncharacterized LOC100192378	184	5.34	3.12	233	8.15	4.76	198	8.43	4.92		1.52564	1.57692
24222	NR_038266	chr3	+	123304402	123349666	123349666	123349666	3	123304402,123348340,123349342,	123304648,123348528,123349666,	758	MYLK-AS1	MYLK antisense RNA 1 (non-protein coding)	389	11.3	14.9	490	17.14	22.61	453	19.3	25.46		1.51745	1.70872
15351	NM_004594	chr16	+	67282854	67306094	67282917	67305113	16	67282854,67286444,67288923,67289295,67289655,67290371,67290813,67291247,67291433,67292220,67293475,67293722,67298254,67298942,67299990,67304640,	67283104,67286747,67289087,67289374,67289833,67290592,67291016,67291337,67291504,67292350,67293564,67293849,67298425,67299009,67300128,67306094,	3735	SLC9A5	solute carrier family 9 (sodium/hydrogen exchanger), member 5	112	3.25	0.87	142	4.96	1.32	149	6.35	1.7		1.51724	1.95402
8682	NM_001135953,NM_025211	chr9	-	86354335	86432752	86354611	86421432	13	86354335,86356866,86357444,86363223,86368172,86383732,86395296,86399629,86403515,86414099,86421216,86431910,86432431,	86354659,86356944,86357515,86363287,86368274,86383885,86395319,86399753,86403593,86414243,86421475,86432042,86432752,	1873	GKAP1	G kinase anchoring protein 1	167	4.85	2.58	210	7.34	3.91	184	7.84	4.18		1.5155	1.62016
17100	NM_006000	chr2	-	220115000	220118638	220115073	220118580	4	220115000,220116286,220116729,220118577,	220116045,220116435,220116952,220118638,	1478	TUBA4A	tubulin, alpha 4a	844	24.53	16.59	1062	37.16	25.14	1064	45.35	30.68		1.51537	1.84931
16865	NM_014786	chr11	+	73019662	73080425	73019683	73078825	21	73019662,73057927,73063874,73066577,73066905,73067219,73067753,73068069,73068286,73070878,73071364,73072132,73073084,73073477,73074250,73074791,73075216,73075496,73076434,73076722,73078628,	73022875,73058005,73064057,73066694,73066998,73067396,73067804,73068179,73068372,73070997,73071578,73072206,73073284,73073779,73074500,73074878,73075284,73075645,73076609,73076992,73080425,	7813	ARHGEF17	Rho guanine nucleotide exchange factor (GEF) 17	1091	31.71	4.05	1366	47.8	6.11	1223	52.13	6.67		1.50864	1.64691
14326	NM_000480,NM_001025389,NM_001025390,NM_001172430,NM_001172431	chr11	+	10471867	10529126	10472568	10527431	19	10471867,10472223,10476665,10477480,10482677,10483061,10500072,10503609,10506366,10508781,10514895,10516445,10517116,10518358,10521632,10523016,10524267,10526095,10527254,	10472062,10472590,10476995,10477949,10482971,10483287,10500277,10503772,10506586,10508911,10515090,10516577,10517280,10518485,10521796,10523137,10524441,10526206,10529126,	5659	AMPD3	adenosine monophosphate deaminase 3	393	11.42	2.01	491	17.18	3.03	437	18.62	3.29		1.50746	1.63682
14940	NM_003335	chr3	-	49842637	49851391	49842740	49851220	24	49842637,49843329,49843505,49845168,49845452,49845818,49846408,49846822,49846974,49847247,49847410,49847695,49847949,49848184,49848416,49848705,49849302,49849541,49849840,49850080,49850494,49850681,49850911,49851164,	49842870,49843430,49843598,49845360,49845545,49845901,49846592,49846897,49847158,49847312,49847616,49847861,49848105,49848265,49848524,49848888,49849449,49849639,49849976,49850171,49850601,49850816,49851080,49851391,	3313	UBA7	ubiquitin-like modifier activating enzyme 7	318	9.24	2.78	397	13.89	4.19	346	14.74	4.44		1.50719	1.59712
14264	NM_001145853,NM_006005	chr4	+	6271576	6304992	6279182	6304195	8	6271576,6279177,6288819,6290713,6292923,6293643,6296767,6302383,	6271741,6279414,6288902,6290858,6293094,6293724,6296916,6304992,	3640	WFS1	Wolfram syndrome 1 (wolframin)	1378	40.05	11	1723	60.29	16.56	1495	63.72	17.5		1.50545	1.59091
4245	NM_001130020,NM_001130021,NM_005177	chr17	+	40610861	40674597	40612912	40673138	22	40610861,40612865,40618446,40620027,40622107,40629656,40630480,40632684,40635055,40639172,40642504,40646351,40647051,40647643,40650941,40652724,40653214,40659537,40660589,40665878,40666306,40673044,	40610981,40613029,40618525,40620125,40622236,40629760,40630607,40632767,40635149,40639385,40642655,40646491,40647206,40647734,40651060,40652941,40653322,40659645,40660607,40665996,40666478,40674597,	4161	ATP6V0A1	ATPase, H+ transporting, lysosomal V0 subunit a1	1922	55.87	13.42	2403	84.09	20.2	1987	84.69	20.35		1.50522	1.51639
16135	NM_000055	chr3	-	165490691	165555253	165491169	165548821	4	165490691,165503932,165547304,165555101,	165491294,165504099,165548829,165555253,	2447	BCHE	butyrylcholinesterase	412	11.97	4.89	515	18.02	7.36	417	17.77	7.26		1.50511	1.48466
1347	NM_001941,NM_024423	chr18	-	28570051	28622781	28574140	28622626	17	28570051,28574419,28576756,28581583,28584107,28586872,28587981,28588234,28598036,28598631,28602301,28604314,28605725,28609474,28610938,28612157,28622557,	28574338,28574462,28577014,28581705,28584332,28587097,28588124,28588491,28598222,28598766,28602468,28604459,28605881,28609594,28611138,28612242,28622781,	6978	DSC3	desmocollin 3	1484	43.13	6.18	1856	64.95	9.3	1566	66.75	9.56		1.50485	1.54693
11614	NM_022117	chrX	+	53111541	53117728	53111680	53117121	7	53111541,53113726,53113936,53114135,53114408,53114812,53116957,	53112487,53113804,53114048,53114281,53114503,53115492,53117728,	2828	TSPYL2	TSPY-like 2	377	10.95	3.87	471	16.48	5.82	502	21.39	7.56		1.50388	1.95349
3600	NM_020992	chr10	-	96997329	97050781	96997681	97050672	7	96997329,96998324,97006971,97023620,97028534,97031389,97050576,	96997868,96998442,97007123,97023820,97028619,97031541,97050781,	1451	PDLIM1	PDZ and LIM domain 1	1971	57.29	39.48	2462	86.15	59.37	2002	85.33	58.8		1.5038	1.48936
7821	NM_001083885,NM_001173425,NM_015404	chr9	-	117164359	117267736	117165033	117267081	13	117164359,117165496,117166175,117168634,117170226,117185593,117186613,117187267,117188490,117228546,117240832,117265386,117266463,	117165216,117165619,117166357,117169172,117170298,117185803,117186826,117187304,117188693,117228672,117241051,117265495,117267736,	4162	DFNB31	deafness, autosomal recessive 31	232	6.74	1.61	289	10.11	2.42	291	12.4	2.97		1.50311	1.84472
1343	NM_014751	chr8	-	125563027	125740730	125565232	125740196	14	125563027,125567982,125568472,125569921,125575022,125577902,125579311,125580619,125597327,125601860,125603391,125711766,125716370,125740124,	125565933,125568145,125568646,125570116,125575233,125578000,125579419,125580777,125597402,125601952,125603476,125711840,125716432,125740730,	5007	MTSS1	metastasis suppressor 1	149	4.33	0.86	186	6.5	1.29	174	7.41	1.47		1.5	1.7093
6018	NM_001109754,NM_001206971,NM_001206972,NM_002837	chr12	-	70910631	71031220	70915268	71031175	35	70910631,70918250,70925814,70928267,70928612,70929804,70931934,70932703,70933404,70933606,70933718,70934637,70938336,70946556,70948939,70949649,70953122,70954450,70956623,70960214,70963454,70964805,70965603,70970161,70974815,70980786,70983743,70986061,70988246,70989828,71002848,71003540,71016169,71029450,71031120,	70915291,70918371,70925950,70928431,70928735,70929939,70932011,70932794,70933486,70933624,70933802,70934737,70938443,70946800,70949089,70949928,70953404,70954714,70956887,70960484,70963718,70965069,70965867,70970425,70975082,70981047,70984013,70986325,70988504,70990107,71003119,71003624,71016426,71029846,71031220,	11414	PTPRB	protein tyrosine phosphatase, receptor type, B	105	3.05	0.26	128	4.47	0.39	108	4.6	0.4		1.5	1.53846
12317	NM_001165881,NM_001165882,NM_001165883,NM_001165884,NM_001165885,NM_001165886,NM_001165887,NM_003415,NM_152943	chr12	+	133757994	133783697	133758583	133781116	7	133757994,133758531,133764450,133768074,133768493,133770013,133778729,	133758272,133758616,133764658,133768201,133768589,133770119,133783697,	5868	ZNF268	zinc finger protein 268	168	4.88	0.83	209	7.31	1.24	200	8.52	1.45		1.49398	1.74699
876	NM_003474,NM_021641	chr10	-	127702901	128077127	127705847	128076714	24	127702901,127708263,127724714,127726809,127727862,127729912,127731608,127734623,127737821,127738129,127753374,127755285,127760045,127782553,127786984,127789640,127797161,127798343,127806606,127824152,127843786,127967483,128018980,128076626,	127705908,127708394,127724894,127726918,127727998,127730804,127731717,127734701,127738020,127738238,127753570,127755375,127760223,127782702,127787069,127789810,127797233,127798409,127806793,127824229,127843874,127967557,128019078,128077127,	6981	ADAM12	ADAM metallopeptidase domain 12	3109	90.37	12.94	3856	134.94	19.32	3337	142.24	20.37		1.49304	1.57419
824	NM_145279,NM_201403	chr1	-	47073386	47082563	47075326	47080748	5	47073386,47075673,47078575,47080642,47082382,	47075356,47075876,47079043,47080805,47082563,	2985	MOB3C	MOB kinase activator 3C	209	6.07	2.03	259	9.06	3.03	217	9.24	3.09		1.49261	1.52217
10145	NM_005345	chr6	+	31783290	31785719	31783533	31785459	1	31783290,	31785719,	2429	HSPA1A	heat shock 70kDa protein 1A	258	7.49	3.08	319	11.16	4.59	336	14.32	5.89		1.49026	1.91234
16826	NM_152550	chr5	+	145316125	145442879	145317491	145442264	10	145316125,145317385,145379620,145383620,145393309,145427334,145428637,145435543,145439428,145441988,	145316257,145317869,145379890,145383716,145393624,145427426,145428808,145435776,145439787,145442879,	3043	SH3RF2	SH3 domain containing ring finger 2	1048	30.46	10	1295	45.31	14.88	1148	48.93	16.07		1.488	1.607
85	NM_001253891,NM_032564	chr11	+	75479777	75512581	75480036	75511553	8	75479777,75495662,75501232,75501705,75507372,75508202,75509271,75511398,	75480157,75495791,75501340,75501776,75507577,75508377,75509474,75512581,	2454	DGAT2	diacylglycerol O-acyltransferase 2	183	5.31	2.16	225	7.87	3.2	215	9.16	3.73		1.48148	1.72685
6744	NM_002053	chr1	-	89517986	89531043	89519037	89528917	11	89517986,89520364,89520795,89521698,89522536,89523674,89524523,89524999,89525879,89528727,89530842,	89519151,89520558,89520898,89521911,89522817,89523917,89524726,89525109,89526007,89528936,89531043,	3050	GBP1	guanylate binding protein 1, interferon-inducible	901	26.19	8.58	1108	38.77	12.71	1016	43.3	14.19		1.48135	1.65385
11687	NM_003954	chr17	-	43340487	43394414	43342002	43368111	16	43340487,43342529,43343903,43344458,43344772,43347779,43348424,43350869,43351489,43351830,43362178,43363797,43364519,43366601,43367855,43394325,	43342167,43342630,43344048,43344565,43345126,43347930,43348588,43350974,43351621,43351960,43362316,43364411,43364730,43366671,43368131,43394414,	4467	MAP3K14	mitogen-activated protein kinase kinase kinase 14	617	17.93	4.01	759	26.56	5.94	739	31.5	7.05		1.4813	1.7581
56425	AK126832	chr2	-	45147331	45149606	45147331	45149606	1	45147331,	45149606,	2275	LOC100130502	uncharacterized LOC100130502	264	7.67	3.37	325	11.37	4.99	348	14.83	6.51		1.48071	1.93175
960	NM_001111125,NM_001243197,NM_015075	chrX	-	53262057	53350522	53263400	53350321	18	53262057,53264964,53265503,53267326,53268376,53270965,53272513,53276150,53277295,53277902,53279460,53283711,53284981,53295505,53308745,53310677,53321076,53349614,	53264366,53265014,53265677,53267488,53268476,53271091,53272653,53276317,53277418,53278064,53280356,53284113,53285243,53296246,53308841,53310796,53321106,53350522,	6967	IQSEC2	IQ motif and Sec7 domain 2	241	7	1	295	10.32	1.48	253	10.78	1.54		1.48	1.54
15570	NM_019600	chr15	-	52873517	52970820	52874350	52970218	13	52873517,52876941,52879347,52885774,52892323,52893282,52897329,52900764,52903326,52903771,52905869,52970202,52970768,	52874504,52877141,52879416,52885933,52892432,52893362,52897443,52902580,52903452,52903974,52906054,52970319,52970820,	4217	FAM214A	family with sequence similarity 214, member A	619	17.99	4.26	760	26.59	6.3	656	27.96	6.63		1.47887	1.55634
4020	NM_001009909,NM_001252008,NM_001252010	chr11	+	24518515	25104186	24518789	25100204	12	24518515,24750714,24753663,24759766,24784791,24927536,24936021,24998136,25004671,25071583,25098874,25100099,	24518851,24750832,24753734,24759848,24784854,24927599,24936084,24998211,25004839,25071676,25098952,25104186,	5297	LUZP2	leucine zipper protein 2	531	15.43	2.91	651	22.78	4.3	595	25.36	4.78		1.47766	1.64261
10320	NM_001199898,NM_001199899,NM_001199900,NM_002611	chr17	+	48172100	48188733	48172799	48187461	14	48172100,48172638,48173058,48173495,48174786,48182734,48183248,48184157,48184439,48185519,48185682,48185975,48186650,48187320,	48172262,48172917,48173174,48173650,48174928,48182806,48183735,48184247,48184517,48185596,48185781,48186083,48186764,48188733,	3392	PDK2	pyruvate dehydrogenase kinase, isozyme 2	584	16.97	5	715	25.02	7.37	602	25.66	7.56		1.474	1.512
755	NM_139055	chr11	+	130318868	130346539	130318868	130343716	8	130318868,130331383,130331981,130332391,130339156,130340814,130341102,130342941,	130319825,130331516,130332149,130332675,130339334,130340996,130341278,130346539,	5676	ADAMTS15	ADAM metallopeptidase with thrombospondin type 1 motif, 15	788	22.9	4.03	962	33.66	5.93	940	40.06	7.05		1.47146	1.74938
11297	NM_033254	chr3	+	112931374	113006305	112968649	113005709	20	112931374,112935033,112968568,112969401,112987145,112989647,112991256,112991915,112993221,112996944,112997519,112998095,112998670,112999404,112999877,113002257,113003181,113003628,113004218,113005521,	112931540,112935125,112968746,112969680,112987292,112989791,112991550,112992188,112993529,112997104,112997630,112998302,112998852,112999510,113000000,113002479,113003414,113003705,113004412,113006305,	4280	BOC	Boc homolog (mouse)	474	13.77	3.21	577	20.19	4.71	480	20.46	4.78		1.46729	1.4891
10233	NM_001013647	chr22	-	38974124	39052634	38982129	39046173	17	38974124,38987439,38993208,38995768,39001258,39003393,39016216,39019176,39022184,39024242,39024838,39032455,39034750,39035659,39041567,39046031,39052124,	38982204,38987545,38993361,38995926,39001353,39003481,39016296,39019284,39022308,39024347,39024940,39032602,39034827,39035729,39041650,39046267,39052634,	10322	LOC646851	putative uncharacterized protein LOC388900	147	4.27	0.41	178	6.22	0.6	160	6.82	0.66		1.46341	1.60976
5047	NM_014992	chr14	+	59655398	59836471	59730195	59835577	26	59655398,59730158,59757934,59781997,59787207,59789609,59790845,59791068,59792381,59792677,59793227,59793650,59797218,59797926,59798530,59805102,59806791,59814256,59819243,59820593,59821882,59826114,59827519,59830368,59834146,59835367,	59655486,59730378,59758024,59782069,59787302,59789943,59790956,59791172,59792448,59792795,59793366,59793709,59797406,59798226,59798638,59805132,59806898,59814341,59819350,59820682,59822051,59826222,59827580,59830500,59834317,59836471,	4256	DAAM1	dishevelled associated activator of morphogenesis 1	530	15.4	3.61	643	22.5	5.28	571	24.33	5.71		1.4626	1.58172
13619	NM_015916	chr10	-	105206542	105212162	105206908	105209698	4	105206542,105209143,105210839,105211912,	105207325,105209856,105211042,105212162,	1949	CALHM2	calcium homeostasis modulator 2	378	10.98	5.63	458	16.02	8.21	427	18.2	9.33		1.45826	1.65719
6829	NM_001127183,NM_001127184,NM_001202515,NM_001202516,NM_001202517,NM_001202518,NM_001202519,NM_003879	chr2	+	201980876	202037411	201994588	202028696	12	201980876,201983268,201994451,201997687,202000694,202004997,202006096,202010100,202013725,202014476,202025154,202027718,	201981204,201983624,201994869,201997857,202000830,202005162,202006323,202010155,202013775,202014558,202025665,202037411,	12191	CFLAR	CASP8 and FADD-like apoptosis regulator	737	21.42	1.75	889	31.11	2.55	744	31.71	2.6		1.45714	1.48571
2419	NM_025149	chr17	+	48503518	48552200	48503622	48551913	16	48503518,48538037,48538602,48538993,48539544,48539780,48540516,48540755,48541178,48541578,48548388,48549788,48551025,48551254,48551559,48551862,	48503750,48538233,48538731,48539047,48539663,48539946,48540612,48540913,48541270,48541655,48548496,48549940,48551167,48551365,48551628,48552200,	2239	ACSF2	acyl-CoA synthetase family member 2	409	11.88	5.3	494	17.28	7.71	407	17.34	7.74		1.45472	1.46038
11767	NM_017563	chr3	-	57124009	57199403	57130420	57199314	13	57124009,57131623,57135206,57136506,57137118,57138369,57139884,57140137,57143564,57144220,57148719,57154283,57199188,	57130533,57132566,57135391,57136617,57137173,57138435,57140036,57140182,57143685,57144339,57148845,57154341,57199403,	8720	IL17RD	interleukin 17 receptor D	1311	38.1	4.36	1581	55.32	6.34	1349	57.5	6.59		1.45413	1.51147
2375	NM_001142885,NM_014548	chr15	+	52043757	52108558	52058638	52100651	10	52043757,52058569,52060458,52065908,52069128,52073240,52074917,52090393,52098573,52100616,	52043909,52058764,52060615,52066031,52069215,52073371,52075025,52090537,52098718,52108558,	9184	TMOD2	tropomodulin 2 (neuronal)	597	17.35	1.88	717	25.09	2.73	628	26.76	2.91		1.45213	1.54787
18257	NM_004281	chr10	+	121410881	121437329	121411187	121436794	4	121410881,121429362,121431766,121435975,	121411367,121429689,121432168,121437329,	2569	BAG3	BCL2-associated athanogene 3	7463	216.94	84.44	8991	314.64	122.47	7631	325.28	126.61		1.45038	1.49941
508	NM_001083,NM_033430,NM_033437	chr4	-	120415549	120549981	120419755	120549826	23	120415549,120422324,120423735,120425690,120427009,120428758,120432201,120440199,120442089,120446703,120460114,120463613,120473704,120474792,120481450,120483987,120486475,120488227,120517677,120527863,120548304,120549149,120549674,	120419893,120422408,120423810,120425754,120427087,120428859,120432289,120440294,120442215,120446850,120460174,120463789,120473792,120474901,120481518,120484125,120486565,120488299,120517767,120528452,120548442,120549239,120549981,	7217	PDE5A	phosphodiesterase 5A, cGMP-specific	1199	34.85	4.82	1443	50.49	6.99	1225	52.21	7.23		1.45021	1.5

## Sheet: RPE1 FC < 0.7
Downregulated genes under nonstressed conditions in the Hikeshi-KO hTERT-RPE1 cells, compared with WT cells (fold change < 0.7)
hg19														1_hTERT_RPE1_non_HS 181022_Hiseq2B_l6_025_Dr_Imamoto			2_Hikeshi-KO#3_non_HS 181022_Hiseq2B_l6_026_Dr_Imamoto			3_Hikeshi-KO#4_non_HS 181022_Hiseq2B_l6_027_Dr_Imamoto 181106_Hiseq2A_l8_027_Dr_Imamoto				non-HS Hikeshi-KO#3/WT	non-HS Hikeshi-KO#4/WT
inhouse ID	Acc#	chomosome	strand	utr start	utr end	cds start	cds end	exon num	exon starts	exon ends	mRNA length	symbol	definition	tag	ppm	rpkm	tag	ppm	rpkm	tag	ppm	rpkm		rpkm ratio	rpkm ratio
463	NM_005450	chr17	+	54671059	54672951	54671584	54672283	1	54671059,	54672951,	1892	NOG	noggin	1743	50.66	26.77	216	7.55	3.99	109	4.64	2.45		0.149047	0.0915204
2340	NM_022842,NM_178181	chr3	-	45123768	45187914	45127129	45187779	9	45123768,45130545,45132664,45134768,45136838,45151730,45153574,45159903,45187697,	45127559,45130633,45133030,45135149,45137060,45152333,45153937,45160113,45187914,	6241	CDCP1	CUB domain containing protein 1	2459	71.48	11.45	389	13.61	2.18	598	25.49	4.08		0.190393	0.356332
5525	NM_001200	chr20	+	6748744	6760910	6750773	6759736	3	6748744,6750766,6758891,	6749522,6751119,6760910,	3150	BMP2	bone morphogenetic protein 2	824	23.95	7.6	132	4.61	1.46	104	4.43	1.4		0.192105	0.184211
8430	NM_002852	chr3	+	157154579	157161417	157154722	157160768	3	157154579,157155301,157160154,	157154852,157155703,157161417,	1938	PTX3	pentraxin 3, long	13708	398.47	205.6	2516	88.04	45.42	1699	72.42	37.36		0.220914	0.181712
8392	NM_018957	chr22	+	38035683	38052050	38035794	38051691	18	38035683,38037132,38037380,38038545,38038901,38039104,38039650,38040643,38040876,38041371,38042824,38043273,38043447,38044325,38046158,38046548,38049785,38051278,	38035853,38037175,38037485,38038622,38039013,38039181,38039795,38040712,38040967,38041517,38042936,38043355,38043528,38044442,38046256,38046732,38049880,38052050,	2576	SH3BP1	SH3-domain binding protein 1	451	13.11	5.08	92	3.21	1.24	182	7.75	3		0.244094	0.590551
13864	NM_001143679,NM_001143680,NM_001143681,NM_015917	chr7	+	142960521	142966222	142960606	142965930	7	142960521,142961178,142961640,142962084,142964709,142965183,142965880,	142960678,142961260,142961769,142962389,142964826,142965277,142966222,	1226	GSTK1	glutathione S-transferase kappa 1	807	23.45	19.12	178	6.22	5.07	183	7.8	6.36		0.265167	0.332636
6171	NM_005524	chr3	+	193853930	193856401	193854169	193856022	4	193853930,193854405,193854749,193855471,	193854277,193854501,193854837,193856401,	1461	HES1	hairy and enhancer of split 1, (Drosophila)	444	12.9	8.82	98	3.42	2.34	154	6.56	4.49		0.265306	0.50907
5532	NM_001171093,NM_144635	chr3	+	184053716	184064063	184055418	184062758	8	184053716,184055098,184055275,184056174,184059511,184059853,184060531,184062282,	184053911,184055159,184055506,184056317,184059605,184060036,184060648,184064063,	2805	FAM131A	family with sequence similarity 131, member A	383	11.13	3.96	102	3.56	1.26	95	4.04	1.44		0.318182	0.363636
13576	NM_001079906,NM_001079907,NM_001253798,NM_001253799,NM_001253800,NM_001253801,NM_018555	chr19	+	54024176	54083523	54072630	54081206	12	54024176,54025870,54041332,54042041,54042469,54057898,54058560,54059098,54067016,54072557,54074857,54079950,	54025338,54025938,54041745,54042206,54042536,54057947,54058835,54059162,54067046,54072639,54074984,54083523,	6075	ZNF331	zinc finger protein 331	376	10.92	1.79	100	3.49	0.57	109	4.64	0.76		0.318436	0.424581
10317	NM_032047	chr3	+	182971031	182991179	182987586	182988723	2	182971031,182987285,	182971260,182991179,	4123	B3GNT5	UDP-GlcNAc:betaGal beta-1,3-N-acetylglucosaminyltransferase 5	595	17.29	4.19	160	5.59	1.35	200	8.52	2.06		0.322196	0.491647
7809	NM_001099409	chr11	+	65343508	65360116	65343773	65359773	19	65343508,65346548,65346811,65347406,65347551,65347807,65348528,65348681,65349009,65351711,65351956,65352429,65357221,65357406,65357557,65357963,65359270,65359446,65359673,	65343877,65346606,65346907,65347460,65347730,65347950,65348597,65348844,65351236,65351869,65352005,65353062,65357291,65357462,65357681,65358063,65359344,65359561,65360116,	5180	EHBP1L1	EH domain binding protein 1-like 1	2330	67.73	13.07	633	22.15	4.27	830	35.37	6.82		0.326702	0.521806
17919	NM_020747	chr5	-	123972609	124080805	123973592	124080682	9	123972609,123974825,123976944,123979203,123979936,123982371,123985302,124036706,124079776,	123973599,123974907,123977098,123979376,123980354,123984826,123985390,124036962,124080805,	5645	ZNF608	zinc finger protein 608	599	17.41	3.08	164	5.73	1.01	128	5.45	0.96		0.327922	0.311688
22107	NR_003491,NR_033319,NR_033320,NR_033321	chr22	+	27053445	27072440	27072440	27072440	5	27053445,27059279,27061420,27063147,27064120,	27053618,27059362,27062900,27063273,27072440,	10182	MIAT	myocardial infarction associated transcript (non-protein coding)	1185	34.44	3.38	342	11.96	1.17	203	8.65	0.84		0.346154	0.248521
4480	NM_005401	chr1	-	214522038	214725024	214531264	214638146	19	214522038,214537854,214542799,214546053,214549561,214551301,214556653,214560186,214564330,214567037,214568241,214571255,214575027,214576225,214585026,214587971,214625147,214637972,214724525,	214531393,214538018,214543034,214546182,214549780,214551445,214558131,214560265,214564388,214567120,214568329,214571344,214575115,214576296,214585094,214588069,214625317,214638300,214725024,	13443	PTPN14	protein tyrosine phosphatase, non-receptor type 14	10764	312.89	23.27	3175	111.1	8.26	2453	104.56	7.77		0.354963	0.333906
8760	NM_006528	chr7	-	93515744	93520065	93516131	93519990	5	93515744,93516572,93518346,93519448,93519902,	93516208,93516743,93518535,93519631,93520065,	1170	TFPI2	tissue factor pathway inhibitor 2	2903	84.38	72.11	857	29.99	25.63	941	40.11	34.28		0.355429	0.475385
8007	NM_025015	chr10	-	118430702	118502085	118434291	118501980	12	118430702,118435909,118439013,118440662,118441301,118443301,118451861,118458145,118460453,118464661,118466710,118501940,	118434929,118436013,118439272,118440767,118441388,118443473,118451978,118458250,118460640,118464789,118466796,118502085,	5722	HSPA12A	heat shock 70kDa protein 12A	1370	39.82	6.95	406	14.2	2.48	240	10.23	1.78		0.356835	0.256115
11030	NM_001204458,NM_001204459,NM_018647,NM_148957	chr13	+	24144508	24250244	24164322	24247519	11	24144508,24153498,24164288,24167483,24190005,24200845,24233188,24234503,24242118,24242830,24247510,	24144987,24153668,24164391,24167594,24190184,24200931,24233353,24234629,24242221,24243412,24250244,	4838	TNFRSF19	tumor necrosis factor receptor superfamily, member 19	690	20.05	4.14	211	7.38	1.52	92	3.92	0.81		0.36715	0.195652
12937	NM_001142351,NM_001142352,NM_032528	chr2	-	107418055	107503563	107423133	107460433	8	107418055,107429531,107446521,107449020,107450504,107459490,107502548,107503431,	107423405,107429680,107446696,107449122,107450602,107460490,107502610,107503563,	7068	ST6GAL2	ST6 beta-galactosamide alpha-2,6-sialyltranferase 2	7465	217	30.7	2296	80.34	11.36	1682	71.69	10.14		0.370033	0.330293
13082	NM_024734	chr14	-	95648275	95786245	95657900	95786129	13	95648275,95660185,95660872,95662834,95669174,95675731,95677022,95679555,95681977,95688027,95690096,95696408,95786047,	95658069,95660256,95660933,95663031,95670800,95675814,95677216,95679746,95682070,95688111,95690192,95696470,95786245,	12750	CLMN	calmin (calponin-like, transmembrane)	323	9.38	0.73	103	3.6	0.28	117	4.98	0.39		0.383562	0.534247
8914	NM_001256371,NM_001256372,NM_024680	chr11	-	19245609	19263202	19246204	19261668	14	19245609,19246767,19247278,19251000,19251787,19252177,19253780,19255906,19256290,19258860,19259400,19261653,19262094,19262953,	19246387,19247162,19247411,19251535,19251875,19252381,19253918,19256068,19256605,19259017,19259679,19261777,19262507,19263202,	3970	E2F8	E2F transcription factor 8	403	11.71	2.94	130	4.54	1.14	98	4.17	1.05		0.387755	0.357143
16052	NM_000022	chr20	-	43248162	43280376	43248474	43280248	12	43248162,43248939,43249658,43251228,43251469,43251647,43252842,43254209,43255096,43257687,43264867,43280215,	43248488,43249042,43249788,43251293,43251571,43251719,43252970,43254325,43255240,43257810,43264929,43280376,	1532	ADA	adenosine deaminase	256	7.44	4.85	86	3	1.95	115	4.9	3.19		0.402062	0.657732
2182	NM_001134387,NM_001134388,NM_001134389,NM_018106	chr7	+	6617064	6628610	6620192	6628541	8	6617064,6618131,6620185,6621237,6621703,6622936,6624646,6628247,	6617351,6618351,6620309,6621311,6621882,6623062,6624891,6628610,	1618	ZDHHC4	zinc finger, DHHC-type containing 4	417	12.12	7.49	144	5.03	3.1	149	6.35	3.92		0.413885	0.523364
15991	NM_001733	chr12	-	7187514	7245043	7187835	7244984	9	7187514,7189335,7241204,7241434,7241888,7242182,7242651,7244047,7244982,	7188605,7189412,7241327,7241582,7242085,7242329,7242844,7244276,7245043,	2266	C1R	complement component 1, r subcomponent	392	11.39	5.02	135	4.72	2.08	186	7.92	3.49		0.414343	0.695219
7765	NM_020186	chr7	+	96745904	96811075	96747035	96810527	2	96745904,96810323,	96747209,96811075,	2057	ACN9	ACN9 homolog (S. cerevisiae)	250	7.26	3.52	90	3.14	1.52	86	3.66	1.77		0.431818	0.502841
18368	NM_002741,NM_213560	chr19	+	14544165	14582679	14544333	14582596	23	14544165,14551085,14551954,14554281,14557237,14561129,14561707,14562640,14568842,14569043,14574478,14574639,14574871,14578376,14578529,14578687,14580152,14580563,14580723,14580974,14581386,14581582,14582392,	14544354,14551141,14552255,14554433,14557373,14561275,14561921,14562835,14568952,14569187,14574554,14574781,14574965,14578453,14578605,14578779,14580329,14580626,14580800,14581117,14581494,14581663,14582679,	3136	PKN1	protein kinase N1	4416	128.36	40.93	1585	55.46	17.68	1544	65.81	20.98		0.431957	0.512582
11597	NM_001242920,NM_001242921,NM_006227,NM_182676	chr20	-	44527258	44541003	44527579	44540091	17	44527258,44528100,44528260,44528474,44530905,44531078,44533438,44533580,44534906,44536330,44536479,44538154,44538580,44539509,44539790,44539991,44540717,	44527702,44528177,44528324,44528517,44530973,44531243,44533498,44533757,44534998,44536394,44536543,44538310,44538709,44539633,44539890,44540102,44541003,	2224	PLTP	phospholipid transfer protein	846	24.59	11.05	306	10.7	4.81	330	14.06	6.32		0.435294	0.571946
5933	NM_000335,NM_001099404,NM_001099405,NM_001160160,NM_001160161,NM_198056	chr3	-	38589552	38691164	38591811	38674798	29	38589552,38595769,38597146,38597931,38598721,38601637,38603905,38607899,38616787,38618151,38620824,38622421,38627181,38628890,38639219,38640408,38645202,38646219,38647441,38648159,38649641,38651224,38655233,38655465,38662333,38663890,38671801,38674525,38691021,	38593049,38596040,38597251,38598069,38598775,38601919,38604028,38608073,38616942,38618272,38620986,38622862,38627532,38629064,38639458,38640541,38645574,38646399,38647639,38648301,38649705,38651455,38655325,38655557,38662462,38663980,38671920,38674850,38691164,	8597	SCN5A	sodium channel, voltage-gated, type V, alpha subunit	5863	170.43	19.82	2135	74.71	8.69	1095	46.67	5.42		0.438446	0.273461
16869	NM_014705	chr7	-	111366163	111846462	111368329	111846193	52	111366163,111372281,111375109,111376972,111379189,111379451,111381149,111381595,111382068,111386389,111387322,111395570,111398679,111400236,111405173,111407087,111409584,111418331,111422919,111423912,111428717,111430512,111448876,111449356,111451929,111462417,111474643,111484818,111487054,111503427,111508039,111509629,111512045,111512324,111512522,111517085,111535667,111540429,111541732,111555833…	111368776,111372343,111375223,111377045,111379299,111379533,111381270,111381717,111382188,111386473,111387499,111395657,111398846,111400378,111405278,111407174,111409733,111418425,111422980,111424008,111428803,111430661,111448935,111449457,111452005,111462512,111474742,111484953,111487182,111503620,111508210,111509711,111512146,111512408,111512620,111517242,111535774,111540592,111541857,111555959…	8336	DOCK4	dedicator of cytokinesis 4	3593	104.44	12.52	1322	46.26	5.54	895	38.15	4.57		0.442492	0.365016
13059	NM_133489	chr12	+	58013692	58019934	58014003	58019528	14	58013692,58014717,58015045,58015472,58016341,58016569,58016806,58017618,58017785,58018648,58018905,58019018,58019192,58019364,	58014235,58014875,58015210,58015625,58016424,58016717,58016920,58017696,58017881,58018765,58018939,58019113,58019247,58019934,	2409	SLC26A10	solute carrier family 26, member 10	458	13.31	5.52	174	6.08	2.52	175	7.45	3.09		0.456522	0.559783
208	NM_001478	chr12	-	58019550	58026985	58020526	58025915	11	58019550,58021400,58021904,58022495,58022830,58023934,58024260,58024762,58024982,58025697,58026554,	58020744,58021641,58022045,58022686,58022929,58024115,58024301,58024869,58025147,58025916,58026985,	3010	B4GALNT1	beta-1,4-N-acetyl-galactosaminyl transferase 1	1478	42.96	14.27	565	19.77	6.56	551	23.48	7.8		0.459706	0.546601
3952	NM_002876,NM_058216	chr17	+	56769962	56811692	56770004	56811583	9	56769962,56772291,56774053,56780556,56787219,56798106,56801400,56809844,56811478,	56770149,56772695,56774220,56780690,56787351,56798173,56801461,56809905,56811692,	1427	RAD51C	RAD51 homolog C (S. cerevisiae)	660	19.18	13.44	254	8.88	6.22	113	4.81	3.37		0.462798	0.250744
10757	NM_001079675,NM_001986	chr17	-	41605210	41623762	41605886	41622985	14	41605210,41606502,41606871,41607251,41607474,41610041,41610554,41611226,41613793,41622342,41622641,41622925,41623228,41623552,	41606111,41606604,41607044,41607320,41607549,41610307,41610716,41611353,41613847,41622390,41622735,41623036,41623305,41623762,	2469	ETV4	ets variant 4	1149	33.4	13.52	454	15.88	6.43	406	17.3	7		0.475592	0.517751
13076	NM_016401	chr11	+	86013252	86056985	86013490	86056680	5	86013252,86017286,86048420,86055644,86056625,	86013520,86017524,86048572,86055763,86056985,	1137	C11orf73	chromosome 11 open reading frame 73	579	16.83	14.8	230	8.04	7.07	178	7.58	6.66		0.477703	0.45
3363	NM_001168319,NM_001955	chr6	+	12290528	12297427	12290862	12296300	5	12290528,12292573,12294173,12294493,12296194,	12290926,12292742,12294329,12294637,12297427,	2100	EDN1	endothelin 1	697	20.26	9.64	279	9.76	4.64	214	9.12	4.34		0.481328	0.450207
16095	NM_001256171,NM_001256172,NM_001256173,NM_003429	chr19	+	21106058	21133503	21106206	21133108	6	21106058,21116829,21117754,21125606,21129105,21131549,	21106209,21116956,21117853,21126783,21129195,21133503,	3598	ZNF85	zinc finger protein 85	247	7.18	1.99	101	3.53	0.98	86	3.66	1.01		0.492462	0.507538
1858	NM_001011666,NM_004904,NM_182898,NM_182899	chr7	+	28338939	28865511	28452533	28858896	14	28338939,28452143,28475233,28527792,28534523,28547233,28609982,28725720,28758369,28763838,28843815,28848803,28857687,28858732,	28339060,28452536,28475307,28527864,28534617,28547355,28610155,28725814,28758496,28763949,28844139,28849031,28857796,28865511,	8821	CREB5	cAMP responsive element binding protein 5	481	13.98	1.58	197	6.89	0.78	181	7.71	0.87		0.493671	0.550633
7193	NM_014863,NM_015892	chr10	-	125767181	125851930	125769664	125805728	8	125767181,125771848,125779168,125798030,125801816,125804095,125805182,125851839,	125769855,125771996,125780928,125798187,125801963,125804435,125806240,125851930,	6375	CHST15	carbohydrate (N-acetylgalactosamine 4-sulfate 6-O) sulfotransferase 15	978	28.42	4.45	403	14.1	2.21	343	14.62	2.29		0.496629	0.514607
11034	NM_002238,NM_172362	chr1	-	210851656	211307457	210856622	211307287	11	210851656,210948689,210970849,210977308,211092981,211192124,211256121,211263903,211276837,211280595,211307208,	210857480,210948886,210971102,210977508,211093411,211192598,211256240,211264032,211276944,211280719,211307457,	8106	KCNH1	potassium voltage-gated channel, subfamily H (eag-related), member 1	630	18.31	2.25	261	9.13	1.12	165	7.03	0.86		0.497778	0.382222
5339	NM_022475	chr4	+	145567147	145659881	145567827	145659109	13	145567147,145573756,145579941,145580788,145627682,145628238,145629319,145633101,145635376,145636451,145640026,145655892,145658915,	145568106,145573949,145580098,145580990,145627834,145628412,145629463,145633223,145635500,145636582,145640108,145656041,145659881,	3555	HHIP	hedgehog interacting protein	10369	301.41	84.78	4303	150.58	42.35	3983	169.78	47.75		0.499528	0.563222
5818	NM_020927	chr16	+	77822482	78014001	77822579	78011592	9	77822482,77850817,77859142,77896644,77910266,77913065,77918504,78005746,78011493,	77822812,77850947,77859358,77896787,77910370,77913121,77918699,78005830,78014001,	3766	VAT1L	vesicle amine transport protein 1 homolog (T. californica)-like	730	21.22	5.63	308	10.77	2.85	252	10.74	2.85		0.506217	0.506217
17596	NM_001143836,NM_001143837,NM_016931	chr11	-	89057521	89322779	89059923	89224414	22	89057521,89069012,89070614,89073230,89075241,89088129,89106599,89133184,89133382,89135493,89155069,89165951,89173855,89177302,89182607,89184952,89223625,89224357,89225288,89231164,89279804,89322607,	89060044,89069113,89070683,89073339,89075361,89088211,89106660,89133247,89133547,89135710,89155150,89166024,89173883,89177400,89182692,89185063,89223721,89224653,89225387,89231355,89279863,89322779,	4899	NOX4	NADPH oxidase 4	247	7.18	1.46	104	3.63	0.74	102	4.34	0.88		0.506849	0.60274
21860	NR_002147	chr7	+	98870923	98895594	98895594	98895594	16	98870923,98875161,98877132,98878498,98881187,98881495,98882467,98883004,98885514,98886909,98888945,98889934,98891640,98894323,98895282,98895514,	98871046,98875335,98877360,98878603,98881274,98881641,98882558,98883061,98885760,98887027,98889073,98890131,98891773,98894540,98895419,98895594,	2267	MYH16	myosin, heavy chain 16 pseudogene	551	16.01	7.06	236	8.25	3.63	125	5.32	2.34		0.514164	0.331445
9951	NM_001199563,NM_007073,NM_147147	chr6	-	105544698	105585049	105548963	105581452	10	105544698,105563560,105564575,105572421,105573265,105577253,105581226,105584075,105584467,105584843,	105549088,105563702,105564743,105572530,105573453,105577378,105581463,105584221,105584543,105585049,	5787	BVES	blood vessel epicardial substance	541	15.72	2.71	233	8.15	1.4	193	8.22	1.42		0.516605	0.523985
7709	NM_019605	chr1	+	210406194	210416440	210411305	210415682	4	210406194,210411288,210412837,210414902,	210406356,210411480,210412953,210416440,	2008	SERTAD4	SERTA domain containing 4	2091	60.78	30.26	900	31.49	15.68	642	27.36	13.62		0.518176	0.450099
5658	NM_001170464,NM_002595	chr12	-	96672038	96794366	96674019	96728614	16	96672038,96676286,96677380,96679820,96680441,96682944,96688776,96691047,96691404,96692646,96694081,96704829,96707098,96717725,96728496,96793763,	96674663,96676377,96677423,96679926,96680539,96683065,96688900,96691110,96691499,96692761,96694138,96704955,96707232,96717890,96728643,96794366,	4713	CDK17	cyclin-dependent kinase 17	6417	186.53	39.57	2773	97.04	20.58	2113	90.06	19.1		0.520091	0.482689
3161	NM_001145661,NM_001145662,NM_032638	chr3	-	128198264	128212030	128199861	128205874	8	128198264,128200661,128202702,128204569,128205645,128206553,128207194,128211741,	128200161,128200787,128202848,128205211,128205919,128206764,128207373,128212030,	3764	GATA2	GATA binding protein 2	668	19.41	5.15	289	10.11	2.68	320	13.64	3.62		0.520388	0.702913
12324	NM_001142393,NM_006403,NM_182966	chr6	-	11183530	11382581	11185394	11306236	10	11183530,11188450,11190196,11192577,11193823,11200605,11213513,11232736,11306224,11382371,	11185904,11188540,11191438,11192679,11193925,11201279,11213960,11232915,11306388,11382581,	5584	NEDD9	neural precursor cell expressed, developmentally down-regulated 9	271	7.87	1.4	118	4.12	0.73	87	3.7	0.66		0.521429	0.471429
9360	NM_001193307,NM_017654	chr7	-	92728825	92747336	92730640	92735410	3	92728825,92744107,92747175,	92735418,92744208,92747336,	6855	SAMD9	sterile alpha motif domain containing 9	570	16.56	2.41	247	8.64	1.26	109	4.64	0.67		0.522822	0.278008
1692	NM_001145971,NM_138412	chr19	-	55555691	55580914	55556441	55574400	9	55555691,55558754,55559696,55560026,55568020,55570524,55574335,55575663,55580689,	55556677,55558856,55559909,55560131,55568176,55570643,55574585,55575780,55580914,	2273	RDH13	retinol dehydrogenase 13 (all-trans/9-cis)	232	6.74	2.96	101	3.53	1.55	88	3.75	1.64		0.523649	0.554054
5313	NM_032346	chr19	+	34895302	34917072	34895335	34917025	7	34895302,34895553,34895834,34900065,34904641,34912423,34916894,	34895443,34895720,34895895,34900415,34904752,34912572,34917072,	1157	PDCD2L	programmed cell death 2-like	263	7.64	6.6	115	4.02	3.47	119	5.07	4.38		0.525758	0.663636
4616	NM_144600	chr16	-	15959576	15982447	15961296	15982442	5	15959576,15967347,15973660,15977864,15982414,	15961373,15967484,15973745,15978062,15982447,	2250	FOPNL	FGFR1OP N-terminal like	1992	57.9	25.73	878	30.72	13.65	719	30.64	13.61		0.530509	0.528955
2172	NM_012419	chr6	-	153332031	153452389	153332708	153365153	5	153332031,153345396,153347588,153365034,153452258,	153332897,153345631,153347678,153365178,153452389,	1466	RGS17	regulator of G-protein signaling 17	197	5.72	3.9	87	3.04	2.07	76	3.23	2.2		0.530769	0.564103
1387	NM_001098623,NM_052843	chr1	+	228395860	228566575	228399484	228566496	107	228395860,228399466,228401141,228401874,228402490,228403263,228404121,228404713,228412159,228430883,228431996,228433113,228434228,228437665,228444351,228451816,228456230,228461470,228461878,228462272,228463460,228464150,228464630,228464860,228465454,228466389,228466875,228467521,228467879,228468230,228469633,228470718,228471203,228473778,228474473,228475394,228475761,228476325,228479598,228480223…	228395886,228400472,228401411,228402135,228402799,228403530,228404403,228404989,228412435,228431159,228432272,228433389,228434504,228437941,228444627,228452092,228456506,228461749,228462145,228462542,228463727,228464417,228464743,228465014,228465559,228466656,228467145,228467788,228468146,228468497,228469906,228470985,228471470,228474051,228474740,228475661,228476025,228476589,228479862,228480487…	25727	OBSCN	obscurin, cytoskeletal calmodulin and titin-interacting RhoGEF	289	8.4	0.32	126	4.4	0.17	121	5.15	0.2		0.53125	0.625
17160	NM_003877	chr12	+	93963597	93969978	93966673	93968955	3	93963597,93966460,93968497,	93963974,93966812,93969978,	2210	SOCS2	suppressor of cytokine signaling 2	386	11.22	5.07	171	5.98	2.7	82	3.49	1.57		0.532544	0.309665
16352	NM_001098202,NM_006497	chr17	+	1958392	1962981	1959603	1962129	3	1958392,1959603,1959964,	1958532,1959640,1962981,	3194	HIC1	hypermethylated in cancer 1	631	18.34	5.74	282	9.86	3.08	245	10.44	3.26		0.536585	0.567944
17370	NM_001136472,NM_001136473,NM_004862	chr16	-	11641577	11680806	11643492	11650586	6	11641577,11645562,11647388,11650366,11680001,11680741,	11643601,11645660,11647545,11650591,11680229,11680806,	2797	LITAF	lipopolysaccharide-induced TNF factor	858	24.94	8.91	383	13.4	4.79	332	14.15	5.05		0.537598	0.566779
18182	NM_001122834,NM_001170564,NM_001170580,NM_001170587,NM_001170588,NM_018194	chr1	+	210501595	210849638	210502354	210847721	14	210501595,210502249,210502639,210522276,210536195,210560811,210573811,210577807,210591497,210637848,210686496,210761241,210796869,210847629,	210501728,210502448,210502827,210522410,210536263,210560925,210574006,210578023,210591669,210637999,210686532,210761443,210797014,210849638,	3962	HHAT	hedgehog acyltransferase	682	19.82	5	306	10.7	2.7	211	8.99	2.26		0.54	0.452
14316	NM_001202,NM_130850,NM_130851	chr14	-	54416454	54423554	54416749	54418940	5	54416454,54418570,54419993,54421138,54423267,	54417606,54418947,54420118,54421270,54423554,	2073	BMP4	bone morphogenetic protein 4	2337	67.93	32.76	1056	36.95	17.82	1009	43	20.74		0.543956	0.633089
24863	NR_003239	chr20	+	37075296	37079564	37079564	37079564	5	37075296,37076108,37077304,37078978,37079175,	37075655,37076266,37077373,37079090,37079564,	1087	SNHG11	small nucleolar RNA host gene 11 (non-protein coding)	203	5.9	5.42	92	3.21	2.95	80	3.41	3.13		0.54428	0.577491
18151	NM_014290	chr9	+	100174301	100258405	100190747	100258165	17	100174301,100190741,100193214,100194306,100201526,100203939,100222459,100227123,100232839,100234574,100235773,100237664,100240720,100243109,100245130,100249453,100257944,	100174520,100190954,100193356,100194520,100201600,100204157,100223046,100227310,100232951,100234777,100235908,100237751,100240855,100243220,100245633,100249614,100258405,	3762	TDRD7	tudor domain containing 7	601	17.47	4.64	273	9.55	2.53	219	9.33	2.48		0.545259	0.534483
10162	NM_016456	chr1	-	201103899	201123632	201104790	201123051	6	201103899,201112947,201115867,201120888,201122985,201123572,	201104943,201113079,201115976,201120980,201123087,201123632,	1539	TMEM9	transmembrane protein 9	1143	33.22	21.58	518	18.12	11.77	477	20.33	13.2		0.545412	0.611677
2413	NM_001256295,NM_005239	chr21	+	40177230	40196878	40177270	40194813	11	40177230,40177754,40181958,40184926,40186196,40186704,40188931,40190348,40191426,40193509,40194597,	40177540,40178044,40182030,40185038,40186316,40186905,40189015,40190570,40191690,40193628,40196878,	4075	ETS2	v-ets erythroblastosis virus E26 oncogene homolog 2 (avian)	4353	126.53	31.05	1992	69.71	17.1	1474	62.83	15.41		0.550725	0.496296
2757	NM_001031692,NM_005824	chr7	+	102553343	102585556	102574360	102585054	5	102553343,102574220,102579876,102582736,102584656,	102553592,102575132,102580032,102582789,102585556,	2270	LRRC17	leucine rich repeat containing 17	2265	65.84	29	1041	36.42	16.04	900	38.36	16.89		0.553103	0.582414
6338	NM_003174,NM_021738	chr10	-	29746276	30024730	29747175	29843987	41	29746276,29747362,29751205,29752420,29754523,29756670,29759204,29760066,29762766,29769465,29770512,29773584,29775013,29775338,29776091,29777529,29779775,29782142,29783842,29784020,29788044,29801663,29811338,29812379,29813400,29815889,29818633,29819535,29820182,29820930,29821457,29824917,29839525,29843711,29843979,29852129,29858183,29923348,29946897,29975481,30024679,	29747262,29747518,29751330,29752564,29754679,29756804,29759412,29760172,29762918,29769742,29770657,29773760,29775159,29775486,29776228,29777685,29779948,29782320,29783929,29784110,29788192,29801790,29811564,29812956,29813644,29815985,29818773,29819597,29820217,29821101,29822387,29824998,29840192,29843863,29844037,29852221,29858241,29923901,29946997,29975580,30024730,	8547	SVIL	supervillin	9309	270.6	31.66	4312	150.89	17.65	3616	154.13	18.03		0.557486	0.569488
8965	NM_052899	chr5	-	176022802	176037131	176023808	176026835	2	176022802,176036999,	176026878,176037131,	4208	GPRIN1	G protein regulated inducer of neurite outgrowth 1	1004	29.18	6.93	466	16.3	3.87	385	16.41	3.89		0.558442	0.561328
10521	NM_173582	chr11	-	74041360	74109502	74047696	74109206	14	74041360,74049512,74053505,74053929,74054367,74056513,74057776,74058192,74062427,74079536,74081946,74082755,74085459,74109095,	74047799,74049646,74053695,74054059,74054461,74056694,74057874,74058382,74062621,74079620,74082031,74082862,74085627,74109502,	8501	PGM2L1	phosphoglucomutase 2-like 1	1104	32.09	3.77	513	17.95	2.11	396	16.87	1.98		0.559682	0.525199
17270	NM_005619,NM_206900,NM_206901	chr19	-	45988549	46000313	45988965	46000083	11	45988549,45989312,45991728,45991894,45992105,45992603,45996417,45997423,45997783,45998352,46000049,	45989047,45989371,45991775,45991964,45992244,45992811,45996636,45997678,45998263,45998397,46000313,	2284	RTN2	reticulon 2	792	23.02	10.07	370	12.94	5.66	335	14.27	6.24		0.562066	0.619662
2131	NM_031307	chr11	-	125763379	125773116	125763679	125766179	4	125763379,125765118,125765801,125773064,	125764181,125765684,125766225,125773116,	1844	PUS3	pseudouridylate synthase 3	302	8.77	4.75	142	4.96	2.68	135	5.75	3.11		0.564211	0.654737
2654	NM_001037335,NM_033405	chr20	-	62189438	62205592	62190598	62203738	20	62189438,62191280,62191523,62191831,62192147,62192434,62192702,62192953,62193175,62193424,62193640,62193872,62197730,62198196,62199710,62200500,62201856,62202037,62203460,62205536,	62190723,62191448,62191680,62192050,62192282,62192627,62192819,62193098,62193337,62193556,62193735,62197584,62197806,62199107,62200352,62201018,62201964,62202221,62204574,62205592,	10129	PRIC285	peroxisomal proliferator-activated receptor A interacting complex 285	1147	33.34	3.29	539	18.86	1.86	522	22.25	2.19		0.56535	0.665653
13178	NM_020651	chr2	-	64319785	64371605	64321835	64335444	7	64319785,64323258,64323546,64327531,64331834,64335373,64371214,	64322402,64323447,64323744,64327633,64331964,64335513,64371605,	3767	PELI1	pellino E3 ubiquitin protein ligase 1	258	7.49	1.98	121	4.23	1.12	83	3.53	0.93		0.565657	0.469697
12373	NM_032140	chr16	-	67696849	67700628	67697063	67700345	7	67696849,67697322,67697559,67697839,67698898,67699973,67700260,	67697224,67697459,67697723,67697965,67699071,67700168,67700628,	1538	C16orf48	chromosome 16 open reading frame 48	431	12.52	8.14	203	7.1	4.61	190	8.09	5.26		0.566339	0.646192
5846	NM_001199570,NM_015526	chr19	-	36505561	36523797	36507059	36523259	14	36505561,36507808,36508287,36508556,36508749,36509799,36510072,36515297,36517048,36517487,36517853,36518033,36523093,36523625,	36507114,36507881,36508352,36508680,36508893,36509928,36510208,36515534,36517167,36517649,36517947,36518173,36523573,36523797,	3628	CLIP3	CAP-GLY domain containing linker protein 3	696	20.23	5.57	328	11.47	3.16	277	11.8	3.25		0.567325	0.583483
13844	NM_018294	chr10	-	101992054	102027437	101992983	102027350	14	101992054,101995423,101996606,101997778,102003454,102005555,102006551,102010004,102013177,102016018,102019974,102020722,102021735,102027327,	101993128,101995521,101996726,101997988,102003534,102005670,102006692,102010089,102013296,102016233,102020076,102020801,102021820,102027437,	2633	CWF19L1	CWF19-like 1, cell cycle control (S. pombe)	1629	47.35	17.98	772	27.01	10.25	594	25.31	9.61		0.570078	0.534483
16307	NM_018365	chr15	-	56720928	56757335	56721298	56757170	10	56720928,56723570,56726335,56735627,56735835,56736641,56739038,56748591,56756223,56757167,	56721391,56723696,56726593,56735735,56736052,56736871,56739141,56748719,56756445,56757335,	2023	MNS1	meiosis-specific nuclear structural 1	782	22.73	11.23	372	13.01	6.43	316	13.46	6.65		0.572573	0.592164
12116	NM_000228,NM_001017402,NM_001127641	chr1	-	209788217	209825820	209788615	209824289	24	209788217,209789815,209790754,209791251,209791796,209795880,209796326,209796849,209797184,209798992,209800211,209800727,209801379,209803081,209803959,209805927,209806414,209807791,209811252,209811878,209823308,209824261,209825593,209825713,	209788752,209789969,209790931,209791393,209792004,209796025,209796524,209797070,209797345,209799371,209800323,209800924,209801535,209803270,209804080,209806121,209806478,209807983,209811326,209811993,209823463,209824679,209825674,209825820,	4495	LAMB3	laminin, beta 3	2886	83.89	18.66	1374	48.08	10.69	554	23.61	5.25		0.572883	0.28135
3766	NM_014631	chr10	-	105353783	105615164	105361572	105615024	14	105353783,105365554,105371337,105372609,105376953,105386845,105420740,105428365,105452785,105484027,105495489,105526851,105561039,105614952,	105363546,105365674,105371387,105372947,105377071,105386959,105420872,105428410,105452814,105484119,105495566,105526927,105561120,105615164,	11247	SH3PXD2A	SH3 and PX domains 2A	2756	80.11	7.12	1313	45.94	4.08	1201	51.19	4.55		0.573034	0.639045
18332	NM_001196,NM_001244567,NM_001244569,NM_001244570,NM_001244572,NM_197966,NM_197967	chr22	-	18216905	18257431	18218345	18256455	8	18216905,18220782,18222114,18226568,18232870,18256375,18257146,18257405,	18218357,18220995,18222254,18226779,18232940,18256808,18257261,18257431,	2660	BID	BH3 interacting domain death agonist	689	20.02	7.52	329	11.51	4.32	292	12.44	4.67		0.574468	0.621011
12374	NM_001145794,NM_058172	chr4	-	80822770	80994477	80828582	80993714	17	80822770,80898661,80899160,80905031,80905972,80929674,80940051,80952776,80954625,80957125,80975425,80976303,80976513,80977085,80990589,80992736,80993562,	80828621,80898855,80899328,80905124,80906017,80929770,80940130,80952846,80954724,80957186,80975506,80976372,80976621,80977167,80990661,80992808,80994477,	8155	ANTXR2	anthrax toxin receptor 2	12221	355.25	43.56	5843	204.47	25.07	5114	217.99	26.73		0.575528	0.613636
10689	NM_001238	chr19	+	30302900	30315215	30303462	30314684	12	30302900,30303438,30303595,30303875,30308043,30308312,30311608,30312628,30312902,30313146,30313352,30314561,	30303059,30303485,30303683,30303944,30308189,30308448,30311755,30312724,30313037,30313258,30313510,30315215,	1947	CCNE1	cyclin E1	282	8.19	4.2	136	4.75	2.43	125	5.32	2.73		0.578571	0.65
13349	NM_014331	chr4	-	139085247	139163503	139093109	139163223	12	139085247,139100372,139101794,139103450,139104355,139106274,139135738,139140419,139144352,139153420,139157478,139162946,	139093173,139100548,139101944,139103547,139104459,139106398,139135783,139140519,139144478,139153536,139157605,139163503,	9648	SLC7A11	solute carrier family 7 (anionic amino acid transporter light chain, xc- system), member 11	4739	137.75	14.27	2280	79.78	8.26	2103	89.64	9.29		0.578837	0.651016
16343	NM_012208	chr5	+	140071017	140078890	140071233	140078137	13	140071017,140073175,140073519,140073769,140075092,140075322,140075687,140076105,140076527,140076748,140077153,140077516,140078077,	140071341,140073250,140073639,140073865,140075218,140075430,140075786,140076199,140076655,140076991,140077270,140077663,140078890,	2490	HARS2	histidyl-tRNA synthetase 2, mitochondrial (putative)	1031	29.97	12.03	497	17.39	6.98	405	17.26	6.93		0.580216	0.57606
3398	NM_004445	chr7	+	142552791	142568847	142560985	142568657	20	142552791,142558809,142559774,142560513,142560884,142561388,142561723,142563229,142563714,142564235,142564660,142565362,142565751,142565995,142566246,142566726,142567569,142567966,142568282,142568548,	142553147,142558944,142559891,142560591,142561085,142561453,142562504,142563385,142564071,142564360,142564823,142565477,142565804,142566115,142566494,142566900,142567719,142568160,142568438,142568847,	4043	EPHB6	EPH receptor B6	1274	37.03	9.15	616	21.55	5.33	530	22.59	5.58		0.582514	0.609836
6100	NM_016622,NM_145644	chr2	+	86426555	86440477	86426613	86439549	4	86426555,86433228,86434305,86437602,	86426656,86433418,86434450,86440477,	3311	MRPL35	mitochondrial ribosomal protein L35	862	25.05	7.56	418	14.62	4.41	302	12.87	3.88		0.583333	0.513228
18187	NM_001649	chrX	+	9754495	9917481	9754585	9914977	10	9754495,9841691,9859016,9862397,9866229,9900214,9905173,9907234,9912680,9914710,	9754750,9841843,9859148,9864738,9866330,9900910,9905725,9907406,9912953,9917481,	7445	SHROOM2	shroom family member 2	1731	50.31	6.75	842	29.46	3.95	587	25.02	3.36		0.585185	0.497778
6765	NM_001018073,NM_004563	chr14	+	24563482	24573339	24563614	24573173	10	24563482,24566100,24567411,24567683,24568257,24568766,24569203,24571961,24572368,24572718,	24563643,24566346,24567596,24567887,24568445,24568929,24569770,24572099,24572464,24573339,	2569	PCK2	phosphoenolpyruvate carboxykinase 2 (mitochondrial)	1275	37.06	14.42	626	21.9	8.52	564	24.04	9.35		0.590846	0.648405
13630	NM_001256532,NM_001256533,NM_018116	chr1	+	155579960	155584758	155580039	155584064	14	155579960,155580215,155580829,155581006,155581339,155581479,155581773,155581972,155582208,155582634,155582839,155583252,155583447,155583849,	155580123,155580351,155580899,155581082,155581394,155581618,155581891,155582107,155582361,155582766,155583024,155583357,155583557,155584758,	2486	MSTO1	misato homolog 1 (Drosophila)	238	6.91	2.77	117	4.09	1.64	108	4.6	1.85		0.592058	0.66787
5138	NM_001178075,NM_001178076,NM_001178077,NM_001673,NM_133436,NM_183356	chr7	-	97481428	97501854	97481570	97498468	14	97481428,97482371,97482616,97483891,97484664,97486001,97487589,97488165,97488524,97493570,97498219,97499089,97501030,97501662,	97481780,97482527,97482698,97483992,97484771,97486128,97487717,97488267,97488710,97493808,97498491,97499125,97501477,97501854,	2526	ASNS	asparagine synthetase (glutamine-hydrolyzing)	2630	76.45	30.26	1294	45.28	17.92	1119	47.69	18.87		0.592201	0.623596
18601	NM_018050	chr12	-	12482217	12503169	12482960	12496248	4	12482217,12491353,12496025,12503011,	12483892,12491494,12496348,12503169,	2297	MANSC1	MANSC domain containing 1	616	17.9	7.79	304	10.63	4.62	258	10.99	4.78		0.593068	0.613607
19340	ENST00000392061,ENST00000397064,ENST00000397226,ENST00000402297,ENST00000406711,ENST00000470216	chr2	+	37423630	37440868	37426847	37428867	8	37423630,37423665,37424396,37425636,37426846,37428190,37429005,37440579,	37423663,37423812,37424493,37425815,37426962,37428869,37431884,37440868,	4419	LOC100505876	uncharacterized LOC100505876	1467	42.64	9.64	727	25.44	5.75	603	25.7	5.81		0.596473	0.602697
1070	NM_003107	chr6	+	21593971	21598849	21594765	21596190	1	21593971,	21598849,	4878	SOX4	SRY (sex determining region Y)-box 4	2020	58.71	12.03	1006	35.2	7.21	856	36.48	7.47		0.599335	0.620948
12629	NM_003355	chr11	-	73685715	73693889	73686051	73689423	8	73685715,73686535,73687685,73687867,73688930,73689297,73692520,73693765,	73686166,73686716,73687787,73688062,73689141,73689522,73692677,73693889,	1646	UCP2	uncoupling protein 2 (mitochondrial, proton carrier)	801	23.28	14.14	400	13.99	8.49	351	14.96	9.08		0.600424	0.64215
5831	NM_001013649	chr2	-	85832375	85839179	85836067	85839107	4	85832375,85836557,85838790,85839000,	85836190,85836709,85838909,85839179,	4265	C2orf68	chromosome 2 open reading frame 68	541	15.72	3.68	270	9.44	2.21	260	11.08	2.59		0.600543	0.703804
11127	NM_021154,NM_058179	chr9	+	80912058	80945009	80912126	80944002	9	80912058,80915517,80916869,80919650,80921229,80923329,80932591,80942966,80943896,	80912186,80915578,80916939,80919856,80921402,80923499,80932720,80943104,80945009,	2188	PSAT1	phosphoserine aminotransferase 1	5917	172	78.61	2955	103.41	47.26	2518	107.33	49.05		0.601196	0.623966
2977	NM_001190880,NM_001243526,NM_031207	chr1	-	43916673	43919660	43916908	43919464	9	43916673,43917080,43917318,43917468,43917605,43917875,43918573,43919056,43919265,	43916982,43917215,43917388,43917518,43917684,43917990,43918675,43919168,43919660,	1367	HYI	hydroxypyruvate isomerase (putative)	3288	95.57	69.91	1643	57.49	42.05	1461	62.27	45.55		0.601488	0.651552
11157	NM_001126132,NM_001126133,NM_003283	chr19	-	55644160	55660606	55644282	55658525	14	55644160,55645254,55645433,55648470,55649328,55652250,55652553,55653224,55656911,55657801,55658048,55658375,55658493,55660528,	55644328,55645295,55645572,55648580,55649442,55652328,55652670,55653288,55656933,55657834,55658075,55658389,55658536,55660606,	1048	TNNT1	troponin T type 1 (skeletal, slow)	1344	39.06	37.27	674	23.58	22.5	371	15.81	15.08		0.603703	0.404615
12176	NM_015541	chr3	-	66429220	66550845	66430686	66550831	19	66429220,66431000,66431902,66432696,66433405,66434414,66436404,66444463,66448535,66449393,66455621,66457771,66460552,66463294,66465343,66467552,66501982,66512861,66550613,	66430913,66431285,66432055,66432822,66433825,66434696,66436725,66444627,66448607,66449465,66455702,66457915,66460696,66463438,66465487,66467690,66502057,66512933,66550845,	4762	LRIG1	leucine-rich repeats and immunoglobulin-like domains 1	7693	223.62	46.95	3868	135.36	28.42	2695	114.87	24.12		0.605325	0.513738
651	NM_001168320,NM_006675	chr12	+	3186520	3395730	3310359	3392282	9	3186520,3192818,3310342,3387586,3388157,3389547,3390363,3390899,3392210,	3186619,3192885,3310422,3387778,3388232,3389649,3390495,3390983,3395730,	4351	TSPAN9	tetraspanin 9	2396	69.64	16	1206	42.2	9.69	1085	46.24	10.62		0.605625	0.66375
4605	NM_001124758	chr17	+	4402128	4443228	4402342	4440237	13	4402128,4416541,4428351,4433926,4434347,4435836,4436271,4436537,4437082,4439370,4439557,4440194,4440747,	4402712,4416607,4428488,4434078,4434414,4435979,4436424,4436727,4437148,4439469,4439721,4440241,4443228,	4349	SPNS2	spinster homolog 2 (Drosophila)	1641	47.7	10.96	826	28.9	6.64	638	27.19	6.25		0.605839	0.570255
713	NM_001168278,NM_001168280,NM_015472	chr3	-	149235021	149421060	149238591	149375093	9	149235021,149243799,149245622,149260121,149290650,149374662,149375551,149387574,149420910,	149238776,149243912,149245756,149260324,149290787,149375096,149375888,149387678,149421060,	5367	WWTR1	WW domain containing transcription regulator 1	10155	295.19	55	5113	178.93	33.33	4706	200.59	37.37		0.606	0.679455
12379	NM_021922	chr6	+	35420137	35434881	35420322	35434122	10	35420137,35423523,35425332,35425692,35426073,35427107,35427458,35428328,35430565,35434020,	35420570,35424130,35425377,35425761,35426217,35427231,35427537,35428395,35430691,35434881,	2555	FANCE	Fanconi anemia, complementation group E	626	18.19	7.11	316	11.05	4.32	259	11.04	4.32		0.607595	0.607595
7343	NM_006997,NM_206860,NM_206861,NM_206862	chr10	+	123748688	124014057	123781496	124013571	24	123748688,123781451,123809952,123842161,123847992,123892123,123903086,123923104,123954554,123969911,123974905,123976141,123984240,123985880,123987351,123988860,123989865,123996909,123997475,124001472,124008157,124008564,124009058,124013505,	123749003,123781529,123810065,123847474,123848106,123892249,123903221,123923507,123954691,123971223,123974966,123976343,123984302,123985996,123987523,123989001,123989955,123997053,123997552,124001516,124008318,124008671,124009179,124014057,	10096	TACC2	transforming, acidic coiled-coil containing protein 2	3354	97.49	9.65	1695	59.31	5.87	1233	52.55	5.2		0.60829	0.53886
4379	NM_001136493,NM_032793	chr1	+	40420783	40435628	40420964	40435240	14	40420783,40422758,40424333,40430882,40431142,40431528,40432272,40432482,40432757,40433299,40433475,40434005,40434240,40435176,	40421057,40422893,40424497,40431006,40431221,40431686,40432363,40432604,40432841,40433383,40433588,40434149,40434417,40435628,	2201	MFSD2A	major facilitator superfamily domain containing 2A	400	11.62	5.27	203	7.1	3.22	182	7.75	3.52		0.611006	0.667932
10261	NM_001197294,NM_001387	chr5	-	146770370	146889619	146773597	146889421	15	146770370,146775121,146777228,146778644,146780254,146781102,146785172,146788290,146792170,146793158,146795271,146798009,146804437,146833111,146889040,	146773686,146775284,146777408,146778815,146780396,146781259,146785293,146788359,146792251,146793220,146795436,146798194,146804526,146833260,146889619,	5629	DPYSL3	dihydropyrimidinase-like 3	15637	454.55	80.75	7952	278.28	49.43	7355	313.51	55.69		0.612136	0.689659
3667	NM_002430	chr22	-	28144264	28197486	28146902	28196531	2	28144264,28192750,	28147084,28197486,	7556	MN1	meningioma (disrupted in balanced translocation) 1	3802	110.52	14.62	1940	67.89	8.98	1627	69.35	9.17		0.614227	0.627223
95	NM_144723	chr5	+	140080031	140086239	140080045	140085341	6	140080031,140080403,140081590,140083502,140084010,140085197,	140080063,140080497,140081714,140083576,140084156,140086239,	1512	ZMAT2	zinc finger, matrin-type 2	2005	58.28	38.54	1025	35.86	23.71	857	36.53	24.16		0.615205	0.626881
14337	NM_002539	chr2	-	10580507	10588453	10580849	10585158	12	10580507,10581634,10581942,10582137,10583355,10583615,10583827,10584220,10584599,10585056,10585280,10588246,	10580994,10581849,10582055,10582300,10583439,10583697,10583962,10584393,10584773,10585175,10585390,10588453,	2062	ODC1	ornithine decarboxylase 1	21419	622.62	301.94	10968	383.82	186.13	8661	369.18	179.03		0.616447	0.592932
1948	NM_003805	chr12	+	94071150	94244531	94072550	94244047	3	94071150,94072544,94243745,	94071248,94072848,94244531,	1188	CRADD	CASP2 and RIPK1 domain containing adaptor with death domain	198	5.75	4.84	102	3.56	2.99	89	3.79	3.19		0.617769	0.659091
12528	NM_001136051,NM_153377	chr12	-	59265936	59314262	59266353	59314016	20	59265936,59267836,59268211,59270226,59271181,59272605,59274362,59276650,59277301,59279612,59280591,59281570,59282110,59282600,59283777,59284446,59307762,59308045,59313207,59313780,	59266598,59268112,59268355,59270385,59271634,59272887,59274683,59276814,59277373,59279684,59280672,59281714,59282254,59282744,59283921,59284578,59307837,59308117,59313327,59314262,	4143	LRIG3	leucine-rich repeats and immunoglobulin-like domains 3	711	20.66	4.98	365	12.77	3.08	304	12.95	3.12		0.618474	0.626506
4836	NM_003265	chr4	+	186990308	187006252	186997773	187006027	5	186990308,186997766,186999993,187003473,187005798,	186990402,186998214,187000185,187005326,187006252,	3041	TLR3	toll-like receptor 3	306	8.89	2.92	158	5.52	1.81	142	6.05	1.98		0.619863	0.678082
15150	NM_020698	chr12	-	94960899	95044324	94965210	95044206	4	94960899,94972169,94975397,95044128,	94965513,94972305,94976314,95044324,	5863	TMCC3	transmembrane and coiled-coil domain family 3	1698	49.35	8.41	876	30.65	5.22	719	30.64	5.22		0.62069	0.62069
16579	NM_014951,NM_199450,NM_199451,NM_199452	chr10	+	64133915	64431771	64135952	64430061	15	64133915,64135939,64148154,64158498,64159286,64219499,64239634,64280206,64382862,64403501,64414602,64415126,64416155,64425888,64429966,	64134217,64136695,64148335,64158536,64162217,64219556,64240048,64280356,64383010,64403723,64414690,64415391,64416246,64425962,64431771,	7522	ZNF365	zinc finger protein 365	792	23.02	3.06	409	14.31	1.9	340	14.49	1.92		0.620915	0.627451
1528	NM_001100398,NM_015085	chr17	+	2699731	2941035	2699821	2935713	25	2699731,2703808,2808577,2861052,2865963,2866723,2867149,2868833,2883580,2884488,2888276,2894590,2898630,2901514,2908662,2909248,2911304,2921354,2923770,2929301,2929643,2930237,2934215,2935704,2936685,	2699865,2703844,2808662,2861088,2866008,2866756,2867362,2868937,2883659,2884542,2888360,2894691,2898760,2901670,2908734,2909335,2911439,2921492,2923889,2929415,2929758,2930364,2934292,2935743,2941035,	6663	RAP1GAP2	RAP1 GTPase activating protein 2	2006	58.31	8.75	1037	36.28	5.44	913	38.91	5.83		0.621714	0.666286
1981	NM_052913	chr6	+	130758261	130764210	130761567	130763043	2	130758261,130761551,	130760623,130764210,	5021	TMEM200A	transmembrane protein 200A	1431	41.59	8.28	743	26	5.17	612	26.08	5.19		0.624396	0.626812
760	NM_001042546,NM_001243728,NM_001256418,NM_022745	chr1	-	47100710	47134099	47101447	47134063	11	47100710,47108865,47110832,47118252,47119488,47123798,47124358,47129504,47130927,47131318,47133728,	47101642,47108973,47110928,47118300,47119539,47123861,47124409,47129595,47131036,47131550,47134099,	2152	ATPAF1	ATP synthase mitochondrial F1 complex assembly factor 1	843	24.5	11.38	438	15.32	7.11	369	15.72	7.3		0.62478	0.641476
4248	NM_014252	chr13	+	41363546	41386596	41367362	41383803	7	41363546,41367293,41373192,41379253,41381429,41382573,41383678,	41363799,41367417,41373451,41379391,41381599,41382732,41386596,	4021	SLC25A15	solute carrier family 25 (mitochondrial carrier; ornithine transporter) member 15	726	21.1	5.24	378	13.22	3.28	347	14.79	3.67		0.625954	0.700382
13238	NM_000214	chr20	-	10618331	10654694	10620145	10654178	26	10618331,10621430,10621760,10622107,10622430,10623135,10624425,10625004,10625510,10625790,10626003,10626618,10627586,10628607,10629196,10629708,10630169,10630894,10632228,10632778,10633115,10637045,10639115,10644610,10653348,10654097,	10620603,10621581,10621892,10622341,10622540,10623249,10624511,10625032,10625627,10625904,10626117,10626732,10627751,10628758,10629370,10629755,10630283,10631008,10632342,10632898,10633246,10637106,10639370,10644662,10653654,10654694,	5987	JAG1	jagged 1	1656	48.13	8.03	863	30.2	5.04	756	32.22	5.38		0.627646	0.669988
3504	NM_015995	chr15	+	31619082	31670102	31619415	31664502	2	31619082,31664212,	31619992,31670102,	6800	KLF13	Kruppel-like factor 13	686	19.94	2.93	359	12.56	1.84	267	11.38	1.67		0.627986	0.569966
23230	NR_038393	chr7	+	22602955	22613617	22613617	22613617	4	22602955,22604584,22611393,22611703,	22603049,22604771,22611632,22613617,	2434	LOC100506178	uncharacterized LOC100506178	203	5.9	2.42	107	3.74	1.53	87	3.7	1.52		0.632231	0.628099
8102	NM_001193509,NM_017735	chr2	+	32853086	33046118	32853359	33046005	20	32853086,32855589,32858942,32865336,32875197,32889369,32891701,32897338,32903922,32927873,32958894,32961760,32983358,33002948,33007692,33012050,33036090,33037570,33042523,33045882,	32853447,32855767,32859072,32865477,32875300,32889534,32891835,32897451,32903989,32927987,32958990,32961883,32983586,33003047,33007745,33012216,33036288,33037682,33042624,33046118,	2918	TTC27	tetratricopeptide repeat domain 27	680	19.76	6.77	358	12.52	4.29	296	12.61	4.32		0.633678	0.638109
21838	NR_003038	chr6	-	86386724	86388451	86388451	86388451	6	86386724,86387141,86387512,86387671,86387853,86388411,	86386909,86387210,86387593,86387750,86387906,86388451,	507	SNHG5	small nucleolar RNA host gene 5 (non-protein coding)	252	7.32	14.43	133	4.65	9.17	121	5.15	10.15		0.635482	0.703396
2812	NM_001136160,NM_001136161,NM_173518	chr8	+	67782983	67834283	67786375	67831404	16	67782983,67783736,67786287,67786560,67786761,67789583,67790808,67791049,67793083,67795991,67803099,67808404,67809014,67813440,67817460,67831237,	67783066,67783784,67786469,67786691,67786821,67789779,67790931,67791154,67793209,67796229,67803305,67808571,67809194,67814014,67817599,67834283,	5604	C8orf45	chromosome 8 open reading frame 45	263	7.64	1.36	141	4.93	0.87	123	5.24	0.93		0.639706	0.683824
12343	NM_001083926,NM_025080	chr11	+	62104773	62160887	62105449	62159756	7	62104773,62105361,62123796,62124458,62156604,62158993,62159550,	62105046,62105639,62123939,62124616,62156723,62159104,62160887,	2419	ASRGL1	asparaginase like 1	289	8.4	3.47	154	5.38	2.22	112	4.77	1.97		0.639769	0.567723
821	NM_001206426,NM_001206427,NM_032747	chr10	-	105148808	105156270	105151950	105152214	6	105148808,105151947,105152127,105153955,105155502,105156165,	105148923,105152040,105152223,105154151,105155789,105156270,	892	USMG5	up-regulated during skeletal muscle growth 5 homolog (mouse)	2966	86.21	96.64	1577	55.18	61.86	1400	59.67	66.89		0.640108	0.692156
7888	NM_001122955,NM_001130702,NM_032667	chr11	-	62457733	62475179	62457838	62474667	12	62457733,62458083,62458258,62458546,62458751,62459847,62460134,62462039,62469939,62472772,62473674,62474580,	62457993,62458164,62458339,62458613,62458893,62459945,62460269,62462183,62470021,62473089,62473787,62475179,	2119	BSCL2	Berardinelli-Seip congenital lipodystrophy 2 (seipin)	1232	35.81	16.89	656	22.95	10.83	592	25.23	11.9		0.641208	0.704559
4363	NM_001143668,NM_181847	chr12	-	47469489	47473734	47471216	47472785	3	47469489,47472929,47473244,	47472848,47473031,47473734,	3951	AMIGO2	adhesion molecule with Ig-like domain 2	12470	362.49	91.74	6644	232.5	58.84	5627	239.85	60.7		0.641378	0.661652
18446	NM_017712	chr19	+	18451407	18480763	18451491	18474393	5	18451407,18453668,18466704,18468192,18474200,	18451525,18453721,18466821,18468425,18480763,	7084	PGPEP1	pyroglutamyl-peptidase I	1660	48.25	6.81	886	31	4.37	777	33.12	4.67		0.641703	0.685756
56322	AK092172	chr8	-	141536767	141539600	141536767	141539600	2	141536767,141537594,	141537594,141539600,	2833	LOC286109	uncharacterized LOC286109	826	24.01	8.47	442	15.46	5.45	375	15.98	5.64		0.643447	0.66588
23509	NR_033932	chr5	-	98105321	98108788	98108788	98108788	2	98105321,98108325,	98106888,98108788,	2030	FLJ35946	uncharacterized protein FLJ35946	314	9.12	4.49	168	5.87	2.89	114	4.85	2.38		0.643653	0.530067
1050	NM_021946	chrX	+	129139163	129192058	129139207	129190111	12	129139163,129146553,129146925,129154959,129156871,129158964,129162609,129171341,129173111,129184691,129185834,129189828,	129139293,129146644,129150189,129155125,129156952,129159354,129162836,129171508,129173257,129184769,129185991,129192058,	7127	BCORL1	BCL6 corepressor-like 1	628	18.25	2.56	337	11.79	1.65	280	11.93	1.67		0.644531	0.652344
6	NM_025106	chr1	+	9352940	9429590	9415950	9427634	3	9352940,9415801,9427506,	9353130,9416644,9429590,	3117	SPSB1	splA/ryanodine receptor domain and SOCS box containing 1	2241	65.14	20.89	1200	41.99	13.47	1031	43.94	14.09		0.644806	0.674485
5599	NM_004490	chr2	-	165349322	165478360	165349545	165477819	14	165349322,165350940,165353517,165353720,165353883,165358764,165364964,165365251,165378489,165381513,165383523,165404169,165476196,165477628,	165349692,165351034,165353605,165353793,165354000,165358845,165365060,165365362,165378627,165381588,165383645,165404326,165476329,165478360,	2387	GRB14	growth factor receptor-bound protein 14	173	5.02	2.1	93	3.25	1.36	82	3.49	1.46		0.647619	0.695238
11279	NM_000429	chr10	-	82031575	82049434	82033536	82049179	9	82031575,82034275,82034772,82036131,82039928,82040435,82043671,82045267,82049088,	82033639,82034409,82034955,82036350,82040072,82040548,82043794,82045345,82049434,	3404	MAT1A	methionine adenosyltransferase I, alpha	759	22.06	6.48	409	14.31	4.2	341	14.53	4.26		0.648148	0.657407
1218	NM_004964	chr1	+	32757707	32799224	32757770	32798645	14	32757707,32768221,32782265,32790079,32792539,32793136,32794668,32796178,32796368,32797074,32797276,32797690,32798301,32798617,	32757819,32768334,32782383,32790154,32792678,32793278,32794761,32796287,32796509,32797183,32797407,32797843,32798350,32799224,	2091	HDAC1	histone deacetylase 1	1961	57	27.25	1059	37.05	17.71	939	40.02	19.13		0.649908	0.702018
23796	NR_033947	chr3	-	45719656	45730374	45730374	45730374	3	45719656,45720537,45729867,	45720423,45721563,45730374,	2300	LOC644714	uncharacterized LOC644714	884	25.69	11.16	478	16.72	7.26	386	16.45	7.15		0.650538	0.640681
17084	NM_001002010,NM_001166118,NM_016489	chr7	-	33053741	33102409	33054341	33102332	12	33053741,33055281,33057050,33059246,33060883,33061664,33063650,33066428,33069240,33075545,33080483,33102179,	33054443,33055482,33057213,33059336,33060969,33061711,33063720,33066527,33069326,33075600,33080522,33102409,	1868	NT5C3	5'-nucleotidase, cytosolic III	358	10.4	5.56	194	6.78	3.62	155	6.6	3.53		0.651079	0.634892
1290	NM_001243076,NM_001949	chr6	+	20402136	20493945	20402463	20490661	8	20402136,20404033,20480076,20481436,20482992,20486919,20488343,20490398,	20402856,20404063,20480188,20481656,20483151,20487034,20488479,20493945,	5039	E2F3	E2F transcription factor 3	1915	55.66	11.04	1037	36.28	7.19	828	35.29	7		0.651268	0.634058
2534	NM_001079802,NM_001198963,NM_006731	chr9	+	108320410	108403399	108337313	108402404	11	108320410,108335935,108337225,108358878,108363425,108366495,108370099,108377558,108380239,108382214,108397331,	108320446,108336027,108337418,108358938,108363629,108366773,108370232,108377688,108380373,108382342,108403399,	7456	FKTN	fukutin	1178	34.24	4.59	640	22.39	3	546	23.27	3.12		0.653595	0.679739
14002	NM_030647	chr7	-	139784545	139876741	139790893	139876737	20	139784545,139791603,139793855,139796354,139796698,139797344,139798678,139799698,139801750,139810894,139813290,139818912,139820241,139824420,139826436,139827241,139829292,139833338,139838904,139876543,	139790988,139791877,139793938,139796563,139796847,139797442,139798833,139799823,139801960,139810984,139813382,139819019,139820329,139824583,139826623,139827383,139829453,139833456,139838990,139876741,	9178	JHDM1D	jumonji C domain containing histone demethylase 1 homolog D (S. cerevisiae)	166	4.82	0.52	91	3.18	0.34	72	3.06	0.33		0.653846	0.634615
17210	NM_001080849	chr9	-	139256351	139258241	139256463	139258166	3	139256351,139257440,139257938,	139256632,139257580,139258241,	724	DNLZ	DNL-type zinc finger	305	8.86	12.23	166	5.8	8.01	141	6.01	8.3		0.654947	0.678659
5217	NM_031942,NM_145810	chr2	+	174219560	174233718	174219691	174232392	10	174219560,174223439,174223982,174227953,174228545,174229522,174230179,174231010,174231877,174232361,	174219712,174223565,174224219,174228190,174228623,174229717,174230320,174231160,174232014,174233718,	2810	CDCA7	cell division cycle associated 7	939	27.29	9.71	511	17.88	6.36	424	18.07	6.43		0.654995	0.662204
2431	NM_001145134,NM_001145135,NM_001145136,NM_001145137,NM_004377,NM_152245,NM_152246	chr22	-	51007289	51017096	51007766	51016344	20	51007289,51008004,51008721,51009319,51009586,51009803,51010434,51010631,51011303,51011948,51012763,51012921,51014463,51014626,51014964,51015285,51015752,51016203,51016814,51016977,	51007850,51008097,51008835,51009472,51009721,51009968,51010551,51010737,51011489,51012144,51012848,51013029,51014541,51014764,51015066,51015463,51015892,51016506,51016894,51017096,	3157	CPT1B	carnitine palmitoyltransferase 1B (muscle)	250	7.26	2.29	136	4.75	1.5	113	4.81	1.52		0.655022	0.663755
3907	NM_006636	chr2	+	74425689	74442424	74425768	74441369	8	74425689,74432831,74434830,74435695,74437068,74438325,74438867,74441205,	74425869,74433016,74434953,74435848,74437176,74438418,74438993,74442424,	2187	MTHFD2	methylenetetrahydrofolate dehydrogenase (NADP+ dependent) 2, methenyltetrahydrofolate cyclohydrolase	3897	113.28	51.79	2125	74.36	34	1780	75.87	34.69		0.656497	0.66982
9239	NM_001198696,NM_032797	chr10	-	71872022	71892690	71873933	71883840	9	71872022,71874675,71876377,71877567,71880262,71880847,71883160,71883662,71892489,	71874085,71874876,71876530,71877676,71880355,71880967,71883276,71883856,71892690,	3250	AIFM2	apoptosis-inducing factor, mitochondrion-associated, 2	2296	66.74	20.53	1252	43.81	13.48	1062	45.26	13.92		0.6566	0.678032
3148	NM_001161572,NM_001161573,NM_001161574,NM_012323	chr22	+	38597938	38612517	38609860	38610885	4	38597938,38599026,38609829,38610426,	38598245,38599091,38609896,38612517,	2530	MAFF	v-maf musculoaponeurotic fibrosarcoma oncogene homolog F (avian)	865	25.14	9.93	473	16.55	6.54	324	13.81	5.45		0.65861	0.548842
17079	NM_002820,NM_198964,NM_198965,NM_198966	chr12	-	28111016	28124916	28111491	28122427	6	28111016,28115253,28122326,28122613,28122957,28124859,	28111501,28116703,28122449,28122894,28123200,28124916,	2639	PTHLH	parathyroid hormone-like hormone	182	5.29	2	100	3.49	1.32	73	3.11	1.17		0.66	0.585
5485	NM_020812	chr19	-	11309968	11373168	11310172	11373116	48	11309968,11310983,11311391,11311584,11312564,11313069,11313259,11314756,11314875,11319361,11319586,11322451,11322668,11323851,11324950,11325228,11326062,11326476,11327589,11327906,11332526,11332784,11333410,11333668,11338012,11339615,11343878,11346273,11347021,11347468,11348131,11348316,11348720,11348862,11352720,11353734,11353933,11354232,11354477,11356238,11356487,11358741,11361549,11362794,113…	11310215,11311145,11311498,11311728,11312801,11313159,11313385,11314771,11315007,11319505,11319779,11322552,11322827,11324004,11325085,11325325,11326147,11326603,11327772,11328067,11332696,11332924,11333581,11333782,11338153,11339711,11344042,11346435,11347253,11347555,11348233,11348455,11348791,11348980,11352883,11353828,11354061,11354386,11354558,11356388,11356554,11358827,11361762,11362924,113…	6400	DOCK6	dedicator of cytokinesis 6	358	10.4	1.62	196	6.85	1.07	133	5.66	0.88		0.660494	0.54321
15825	NM_014654	chr1	-	31342312	31381480	31346057	31381433	5	31342312,31347143,31349398,31351469,31381295,	31346224,31347435,31350012,31351587,31381480,	5121	SDC3	syndecan 3	225	6.54	1.27	124	4.33	0.84	81	3.45	0.67		0.661417	0.527559
9759	NM_002106	chr4	-	100869243	100871512	100869618	100871327	5	100869243,100869967,100870429,100870819,100871324,	100869680,100870097,100870543,100870897,100871512,	947	H2AFZ	H2A histone family, member Z	6422	186.68	197.12	3539	123.84	130.77	2865	122.12	128.95		0.663403	0.65417
11119	NM_018270	chr20	+	61427804	61431945	61427875	61430995	5	61427804,61428461,61429938,61430326,61430807,	61428023,61428583,61430020,61430401,61431945,	1636	C20orf20	chromosome 20 open reading frame 20	987	28.69	17.53	544	19.03	11.63	455	19.39	11.85		0.663434	0.675984
16862	NM_000544,NM_018833	chr6	-	32789609	32806547	32790065	32806010	13	32789609,32793186,32797176,32797706,32798043,32798394,32800109,32800403,32802930,32803419,32805313,32805517,32806429,	32790095,32796811,32797313,32797866,32798217,32798583,32800238,32800601,32803136,32803550,32805428,32806014,32806547,	6165	TAP2	transporter 2, ATP-binding cassette, sub-family B (MDR/TAP)	3690	107.26	17.39	2035	71.21	11.55	1625	69.26	11.23		0.664175	0.645773
22403	NR_003141,NR_036536	chr5	+	138609440	138618873	138615317	138618873	5	138609440,138611809,138614015,138614739,138618427,	138609850,138611839,138614097,138615317,138618873,	1546	SNHG4	small nucleolar RNA host gene 4 (non-protein coding)	411	11.94	7.72	227	7.94	5.13	179	7.63	4.93		0.664508	0.638601
16423	NM_001038493,NM_178120	chr2	+	172950207	172954401	172950405	172952985	3	172950207,172951381,172952730,	172950718,172951581,172954401,	2382	DLX1	distal-less homeobox 1	487	14.15	5.94	269	9.41	3.95	232	9.88	4.14		0.664983	0.69697
18505	NM_032862	chr8	+	144680073	144682485	144680073	144682002	1	144680073,	144682485,	2412	TIGD5	tigger transposable element derived 5	468	13.6	5.63	259	9.06	3.75	216	9.2	3.81		0.666075	0.676732
15196	NM_014788,NM_033219,NM_033220	chr9	-	100831568	100881488	100849751	100881470	7	100831568,100846636,100854190,100857148,100862212,100872170,100881263,	100831969,100850287,100854283,100857311,100862446,100872266,100881488,	4863	TRIM14	tripartite motif containing 14	1821	52.93	10.88	1008	35.27	7.25	805	34.31	7.05		0.66636	0.647978
13732	NM_006290	chr6	+	138188580	138204449	138192364	138202456	9	138188580,138192349,138195981,138196824,138197132,138198212,138199568,138201207,138202171,	138188631,138192659,138196172,138196972,138197303,138198393,138200488,138201389,138204449,	4432	TNFAIP3	tumor necrosis factor, alpha-induced protein 3	239	6.94	1.56	132	4.61	1.04	108	4.6	1.03		0.666667	0.660256
345	NM_024097	chr1	+	43232915	43241413	43232982	43241065	5	43232915,43233179,43239233,43240407,43240879,	43233061,43233295,43239320,43240539,43241413,	1015	C1orf50	chromosome 1 open reading frame 50	198	5.75	5.66	110	3.84	3.78	87	3.7	3.64		0.667845	0.64311
2866	NM_012449	chr7	+	89783688	89794141	89789102	89794048	5	89783688,89789071,89790118,89791227,89793790,	89783857,89789186,89790631,89791392,89794141,	1313	STEAP1	six transmembrane epithelial antigen of the prostate 1	620	18.02	13.72	345	12.07	9.19	254	10.82	8.24		0.669825	0.600583
5513	NM_017955,NM_145701	chr14	-	105475909	105487425	105477540	105478266	2	105475909,105487335,	105478272,105487425,	2453	CDCA4	cell division cycle associated 4	1962	57.03	23.24	1093	38.24	15.58	901	38.4	15.65		0.670396	0.673408
17745	NM_018205,NM_018239,NM_207119	chr10	-	72058728	72142382	72061109	72136289	6	72058728,72083618,72100308,72136207,72141255,72142304,	72061264,72083786,72100458,72136352,72141414,72142382,	3236	LRRC20	leucine rich repeat containing 20	1980	57.55	17.78	1103	38.59	11.92	782	33.33	10.29		0.670416	0.57874
4430	NM_016275	chr3	+	150321065	150348234	150321149	150344921	6	150321065,150340171,150340829,150342598,150344796,150345445,	150321286,150340282,150340956,150342686,150344950,150348234,	3490	SELT	selenoprotein T	1562	45.4	13	870	30.44	8.72	731	31.15	8.92		0.670769	0.686154
12094	NM_194291	chr8	-	125323158	125384940	125326200	125384398	7	125323158,125332326,125334345,125335561,125339594,125342988,125384094,	125326302,125332432,125334388,125335616,125339662,125343033,125384940,	4307	TMEM65	transmembrane protein 65	1096	31.85	7.39	611	21.38	4.96	499	21.27	4.93		0.671177	0.667118
17866	NM_003966	chr5	-	9035137	9546233	9043008	9380058	23	9035137,9044484,9050521,9051984,9054198,9062998,9066532,9108251,9119109,9122767,9136615,9154599,9190378,9197279,9202066,9224785,9226980,9237939,9318483,9337824,9379934,9437867,9545695,	9043128,9044696,9050569,9052140,9054369,9063217,9066758,9108399,9119253,9122949,9136733,9154807,9190583,9197415,9202352,9224999,9227079,9238002,9318529,9337924,9380135,9437964,9546233,	11808	SEMA5A	sema domain, seven thrombospondin repeats (type 1 and type 1-like), transmembrane domain (TM) and short cytoplasmic domain, (semaphorin) 5A	4936	143.48	12.15	2760	96.58	8.17	1889	80.52	6.81		0.672428	0.560494
6929	NM_001098414,NM_198484	chr3	+	40566375	40581043	40567331	40574581	5	40566375,40567269,40570809,40571699,40573520,	40566765,40567355,40570936,40571807,40581043,	8234	ZNF621	zinc finger protein 621	1300	37.78	4.58	726	25.4	3.08	554	23.61	2.86		0.672489	0.624454
10949	NM_001099403,NM_020226	chr4	+	81106423	81125482	81121234	81124686	10	81106423,81112625,81115266,81117166,81117505,81118116,81118656,81121232,81122443,81123067,	81106672,81112723,81115393,81117278,81117755,81118370,81118917,81121453,81122675,81125482,	4219	PRDM8	PR domain containing 8	2061	59.91	14.2	1155	40.41	9.57	982	41.85	9.91		0.673944	0.697887
12295	NM_032270	chr1	+	90098643	90185094	90152032	90180541	3	90098643,90152028,90178267,	90098881,90152170,90185094,	7207	LRRC8C	leucine rich repeat containing 8 family, member C	1799	52.29	7.25	1011	35.38	4.9	852	36.31	5.03		0.675862	0.693793
18732	NM_152754	chr7	-	84624871	84751247	84628755	84751207	17	84624871,84636117,84642097,84644374,84647567,84649548,84651706,84666204,84669988,84671486,84685032,84694739,84697506,84702277,84710832,84727120,84751056,	84629181,84636257,84642162,84644532,84647609,84649637,84651929,84666349,84670058,84671601,84685175,84694868,84697600,84702397,84710895,84727281,84751247,	6258	SEMA3D	sema domain, immunoglobulin domain (Ig), short basic domain, secreted, (semaphorin) 3D	1088	31.62	5.05	613	21.45	3.42	473	20.16	3.22		0.677228	0.637624
5342	NM_001172105,NM_017577	chr3	+	113557680	113666021	113557756	113664325	19	113557680,113563349,113588353,113594330,113595011,113601598,113616317,113619877,113622986,113627804,113634547,113649560,113652357,113653278,113655112,113656932,113658732,113659086,113664244,	113557783,113563496,113588438,113594434,113595107,113601679,113616660,113619993,113623119,113627967,113634685,113649679,113652500,113653382,113655289,113656990,113658843,113659192,113666021,	4104	GRAMD1C	GRAM domain containing 1C	171	4.97	1.21	97	3.39	0.82	73	3.11	0.75		0.677686	0.619835
1285	NM_032565	chr13	-	50234809	50265623	50235103	50265560	4	50234809,50237192,50243912,50265389,	50235344,50237331,50243982,50265623,	978	EBPL	emopamil binding protein-like	272	7.9	8.07	153	5.35	5.47	124	5.28	5.39		0.677819	0.667906
16011	NM_000379	chr2	-	31557187	31637611	31558823	31637532	36	31557187,31560506,31562354,31564194,31565048,31567549,31569634,31570387,31571133,31571764,31572551,31572897,31587023,31588322,31588841,31589735,31590826,31591406,31593220,31595093,31596738,31598245,31599918,31602732,31604498,31605866,31606620,31609279,31610676,31611092,31620533,31621438,31624085,31625913,31628772,31637490,	31558874,31560683,31562543,31564260,31565163,31567602,31569709,31570516,31571229,31571846,31572697,31573089,31587110,31588410,31588975,31589860,31590923,31591526,31593344,31595263,31596822,31598420,31600103,31602842,31604592,31606018,31606713,31609421,31610763,31611161,31620595,31621565,31624194,31626010,31628830,31637611,	5717	XDH	xanthine dehydrogenase	203	5.9	1.03	115	4.02	0.7	92	3.92	0.68		0.679612	0.660194
5351	NM_018000	chr2	-	216807313	216878346	216809585	216878050	5	216807313,216810293,216811745,216861028,216877955,	216809720,216810457,216811836,216861188,216878346,	3213	MREG	melanoregulin	167	4.85	1.5	94	3.28	1.02	76	3.23	1		0.68	0.666667
15105	NM_001278	chr10	-	101948123	101989344	101949354	101989289	21	101948123,101950625,101953054,101953740,101954181,101959727,101960427,101961844,101964262,101964832,101966986,101969351,101977751,101978474,101978764,101979026,101980344,101981868,101982622,101985679,101989184,	101949384,101950725,101953188,101953888,101954278,101959777,101960537,101961906,101964414,101964956,101967089,101969546,101977887,101978582,101978889,101979116,101980433,101981938,101982737,101985774,101989344,	3524	CHUK	conserved helix-loop-helix ubiquitous kinase	1951	56.71	16.09	1104	38.63	10.96	880	37.51	10.64		0.681168	0.66128
15519	NM_024121	chr2	-	120975046	120980984	120979499	120980552	1	120975046,	120980984,	5938	TMEM185B	transmembrane protein 185B	3487	101.36	17.06	1979	69.25	11.66	1554	66.24	11.15		0.68347	0.653576
13210	NM_001012761	chr5	+	98104998	98132198	98106372	98129457	5	98104998,98106301,98109656,98115283,98128788,	98105329,98106377,98109910,98115792,98132198,	4580	RGMB	RGM domain family, member B	6753	196.3	42.86	3842	134.45	29.35	2667	113.68	24.82		0.684788	0.579095
24478	NR_037408	chr17	-	54968630	54968716	54968716	54968716	1	54968630,	54968716,	86	MIR3614	microRNA 3614	244	7.09	82.44	139	4.86	56.51	105	4.47	51.97		0.685468	0.630398
1766	NM_001130140,NM_022350	chr5	+	96211643	96255406	96215389	96253309	19	96211643,96215267,96219495,96222358,96224888,96228002,96230949,96232076,96232435,96235824,96237209,96237977,96239080,96244664,96245283,96248340,96249020,96251391,96253165,	96212231,96215964,96219634,96222493,96225009,96228157,96231063,96232208,96232567,96235893,96237385,96238057,96239264,96244821,96245468,96248502,96249161,96251473,96255406,	5690	ERAP2	endoplasmic reticulum aminopeptidase 2	351	10.2	1.79	201	7.03	1.23	143	6.09	1.07		0.687151	0.597765
322	NM_001128628,NM_001128629,NM_020168	chr15	+	40509628	40569688	40556986	40568295	12	40509628,40532034,40532799,40545378,40556981,40558042,40564424,40565066,40565546,40565751,40566342,40568127,	40509868,40532296,40532882,40545490,40557190,40558696,40564922,40565200,40565673,40565877,40566477,40569688,	4141	PAK6	p21 protein (Cdc42/Rac)-activated kinase 6	185	5.37	1.29	106	3.7	0.89	84	3.58	0.86		0.689922	0.666667
5955	NM_013339	chr1	+	63833260	63904233	63836648	63902691	15	63833260,63836441,63862183,63867924,63870123,63871987,63872732,63876816,63877596,63879731,63881543,63885040,63894403,63894598,63902493,	63833358,63836730,63862268,63868014,63870212,63872070,63872797,63877002,63877732,63879817,63881628,63885111,63894472,63894797,63904233,	3371	ALG6	asparagine-linked glycosylation 6, alpha-1,3-glucosyltransferase homolog (S. cerevisiae)	343	9.97	2.95	197	6.89	2.04	150	6.39	1.89		0.691525	0.640678
12303	NM_001167928,NM_001167929,NM_001167930,NM_001167931,NM_002182,NM_134470	chr3	+	190231839	190374986	190282078	190374396	14	190231839,190268130,190273918,190282077,190321916,190326783,190338063,190341132,190345111,190347138,190362036,190363487,190366126,190373677,	190232008,190268294,190274005,190282142,190322202,190326970,190338229,190341204,190345238,190348073,190362186,190363631,190369308,190374986,	7043	IL1RAP	interleukin 1 receptor accessory protein	917	26.65	3.78	530	18.54	2.63	390	16.62	2.35		0.695767	0.621693
23791	NR_002824	chr15	-	23282264	23378259	23378259	23378259	35	23282264,23285704,23293372,23295540,23295763,23299022,23299680,23299914,23303804,23306733,23308563,23310008,23311306,23311641,23312160,23313125,23316003,23316891,23318523,23325023,23326006,23326275,23326495,23327195,23329957,23330245,23330480,23330886,23333848,23334999,23335487,23338852,23356105,23377423,23378140,	23283153,23285752,23293512,23295666,23295937,23299121,23299817,23300167,23303947,23306791,23308707,23310147,23311537,23311838,23312308,23313307,23316186,23317084,23318711,23325215,23326158,23326418,23326666,23327329,23330153,23330373,23330613,23331101,23333999,23335103,23335658,23339028,23356220,23377526,23378259,	6075	HERC2P2	hect domain and RLD 2 pseudogene 2	256	7.44	1.22	149	5.21	0.85	120	5.11	0.84		0.696721	0.688525
11122	NM_018948	chr1	-	8071778	8086393	8073269	8075679	4	8071778,8075367,8075554,8086217,	8074456,8075444,8075752,8086393,	3129	ERRFI1	ERBB receptor feedback inhibitor 1	7532	218.94	69.97	4364	152.71	48.8	3322	141.6	45.25		0.697442	0.646706
7356	NM_000958	chr5	+	40680031	40693837	40681095	40692480	3	40680031,40681052,40691880,	40680580,40681962,40693837,	3416	PTGER4	prostaglandin E receptor 4 (subtype EP4)	514	14.94	4.37	298	10.42	3.05	229	9.76	2.85		0.697941	0.652174
23639	NR_039891	chr17	-	62496883	62496967	62496967	62496967	1	62496883,	62496967,	84	MIR3064	microRNA 3064	219	6.36	75.71	127	4.44	52.85	97	4.13	49.16		0.698058	0.64932
964	NM_002198	chr5	-	131817300	131826465	131819642	131825170	10	131817300,131820053,131821358,131821942,131822248,131822486,131822645,131823617,131825083,131826236,	131819767,131820189,131821408,131822065,131822378,131822536,131822822,131823717,131825175,131826465,	3554	IRF1	interferon regulatory factor 1	1816	52.78	14.85	1056	36.95	10.39	844	35.97	10.12		0.699663	0.681481
14306	NM_017823	chr1	+	159750758	159752333	159750890	159752128	3	159750758,159750888,159751942,	159750783,159751157,159752333,	685	DUSP23	dual specificity phosphatase 23	206	5.98	8.72	120	4.19	6.11	88	3.75	5.47		0.700688	0.627294
12940	NM_198066	chr14	-	53241910	53258386	53245028	53251368	6	53241910,53247396,53248501,53250140,53251214,53258145,	53245176,53247458,53248629,53250203,53251382,53258386,	3928	GNPNAT1	glucosamine-phosphate N-acetyltransferase 1	3189	92.7	23.59	1857	64.98	16.54	1528	65.13	16.58		0.701145	0.70284
